# Supplementary material for: Lack of GABARAP-Type Proteins Is Accompanied by Altered Golgi Morphology and Surfaceome Composition
Source: Int J Mol Sci. 2020 Dec 23;22(1):85. doi: 10.3390/ijms22010085 (PMC7795684; doi:10.3390/ijms22010085)
Supplement: Supplementary file 1 [file ijms-22-00085-s001.zip › TableS1 Mass-spectrometry data set.xlsx]

## Sheet: Table S1 Normalised Processed P
			Log2 normalised median subtracted values (N/A values imputed)																																						CSPA annotation (1=high confidence;2=putative;3=unspecific)
TKO-1	TKO-2	TKO-3	TKO-4	TKO-5	biotin ctrl.	WT-1	WT-2	WT-3	WT-4	C: GOMF name	C: GOBP slim name	C: GOCC slim name	C: KEGG name	C: SMART name	N: Peptides	N: Razor + unique peptides	N: Unique peptides	N: Sequence coverage [%]	N: Unique + razor sequence coverage [%]	N: Unique sequence coverage [%]	N: Mol. weight [kDa]	N: Q-value	N: Score	N: Intensity	N: MS/MS count	N: MS/MS count JD-10	N: MS/MS count JD-11	N: MS/MS count JD-12	N: MS/MS count JD-13	N: MS/MS count JD-14	N: MS/MS count JD-4	N: MS/MS count JD-5	N: MS/MS count JD-6	N: MS/MS count JD-7	N: MS/MS count JD-8	N: MS/MS count JD-9	T: Protein IDs	T: Majority protein IDs	T: Protein names	T: Gene names	T: group	M: Sequence lengths
0	0.418879	0.671179	0.286631	0.265766	0.212463	-0.632725	-0.865456	-0.609156	-0.494186	aminopeptidase activity;binding;catalytic activity;cation binding;exopeptidase activity;hydrolase activity;ion binding;metal ion binding;metallopeptidase activity;peptidase activity;peptidase activity, acting on L-amino acid peptides;transition metal ion binding;zinc ion binding	cellular metabolic process;cellular process;metabolic process;peptide metabolic process	cell part;cytoplasm;intracellular membrane-bounded organelle;intracellular organelle;nucleoplasm;nucleus;organelle			10	10	10	48.5	48.5	48.5	44.992	0	28.482	439320000	25	4	4	5	1	1	1	1	1	1	2	4	E7EMB6;A0A024R442;E7ETB3;Q9ULA0;C9JBE1;B9ZVU2;F8WAN0;C9JRG3;C9J1E2;E7EPX3	E7EMB6;A0A024R442;E7ETB3;Q9ULA0;C9JBE1	Aspartyl aminopeptidase	DNPEP		410;471;493;475;331;270;273;117;137;224
0.0791836	0	0.587549	0.431973	0.479095	1.08993	-0.0618916	-0.32865	-0.692305	-0.484835	binding;lipid binding;nucleic acid binding;RNA binding	alcohol metabolic process;establishment of localization;lipid metabolic process;lipid transport;metabolic process;primary metabolic process;small molecule metabolic process;transport	cell part;cytoplasm;intracellular membrane-bounded organelle;intracellular organelle;macromolecular complex;membrane;nucleus;organelle;plasma membrane		KH	20	20	20	24.6	24.6	24.6	141.44	0	75.396	885770000	64	7	12	12	12	3	2	1	1	1	4	9	A0A024R4E5;Q00341;H0Y394;H7C0A4;C9J5E5;C9JIZ1;C9JT62;C9JHS7;C9JK79;C9JHZ8;C9JES8;C9JZI8;C9JBS3;C9JEJ8;C9JHN6;H7C2D1;C9JQ82;H7BZC3;C9JHS9;C9J739;C9JMQ6	A0A024R4E5;Q00341;H0Y394	Vigilin	HDLBP		1268;1268;973;332;221;224;96;126;128;141;147;164;69;79;81;308;53;267;17;19;46
-0.551155	-0.175173	-0.0654602	0.217304	0.574526	0	-0.0608425	0.289785	0.416237	0.140232	binding;nucleic acid binding;RNA binding;rRNA binding;structural constituent of ribosome;structural molecule activity;translation regulator activity	biological regulation;biosynthetic process;catabolic process;cellular component disassembly;cellular component organization;cellular metabolic process;cellular nitrogen compound metabolic process;cellular process;establishment of localization;macromolecule metabolic process;metabolic process;mRNA metabolic process;nitrogen compound metabolic process;nucleobase-containing compound metabolic proces…	cell part;cytoplasm;cytosol;extracellular organelle;intracellular membrane-bounded organelle;intracellular non-membrane-bounded organelle;intracellular organelle;macromolecular complex;membrane;nucleolus;nucleus;organelle;ribonucleoprotein complex;ribosome;small ribosomal subunit;vesicle	Ribosome	S4	17	17	13	42.8	42.8	33	22.591	0	102.84	11238000000	130	9	13	14	16	10	12	13	12	13	10	8	A0A024R4M0;P46781;B5MCT8;C9JM19;A8MXK4	A0A024R4M0;P46781;B5MCT8;C9JM19	40S ribosomal protein S9	RPS9		194;194;139;156;79
0.201271	0.386385	-0.0584526	-0.478912	-0.0895824	-2.04375	0.27623	-0.701446	-0.476233	0	adenyl nucleotide binding;adenyl ribonucleotide binding;ATP binding;binding;calcium ion binding;catalytic activity;cation binding;enzyme binding;GTP binding;GTPase binding;guanyl nucleotide binding;guanyl ribonucleotide binding;hydrolase activity;ion binding;metal ion binding;nucleic acid binding;nucleotide binding;protein binding;purine nucleotide binding;purine ribonucleoside triphosphate bindi…	biological regulation;cellular component assembly;cellular component organization;cellular localization;cellular membrane organization;cellular process;coagulation;cytoskeleton organization;endocytosis;endosome transport;establishment of localization;homeostatic process;localization;macromolecular complex assembly;membrane invagination;membrane organization;multicellular organismal process;organe…	cell part;cytoplasm;cytoplasmic membrane-bounded vesicle;endosome;extracellular organelle;intracellular membrane-bounded organelle;intracellular organelle;lipid particle;membrane;nucleus;organelle;plasma membrane;vesicle	Endocytosis	EH	5	5	5	18.7	18.7	18.7	42.737	0	11.535	111540000	11	1	1	2	0	0	2	0	0	1	2	2	C9JC03;A0A024R571;Q9H4M9;C9JDQ8;C9J2Z4;Q9NZN3;C9JIJ3;C9IZH1;Q9NZN4	C9JC03;A0A024R571;Q9H4M9;C9JDQ8;C9J2Z4;Q9NZN3	EH domain-containing protein 1;EH domain-containing protein 3	EHD1;EHD3		374;548;534;162;306;535;145;148;543
-0.220513	-0.167996	0.188752	0.167996	0.73364	-2.28295	-0.569101	-0.775729	-0.827958	-0.613527						6	3	1	16.7	12	6.9	58.311	0	7.2636	96344000	7	1	0	2	3	0	0	0	0	0	1	0	A0A024R7W5;A0A087X0Q1;A0A087WY31;Q7Z739	A0A024R7W5;A0A087X0Q1;A0A087WY31;Q7Z739	YTH domain-containing family protein 3	YTHDF3		534;583;588;585
-0.320835	0.146992	0.426058	0.59412	0.721756	0	-0.683638	-0.851929	-0.27212	-0.111362	catalytic activity;endopeptidase activity;hydrolase activity;peptidase activity;peptidase activity, acting on L-amino acid peptides;threonine-type endopeptidase activity;threonine-type peptidase activity	biological regulation;catabolic process;cell cycle;cell death;cellular metabolic process;cellular nitrogen compound metabolic process;cellular process;death;immune system process;macromolecule metabolic process;macromolecule modification;metabolic process;mitotic cell cycle;multi-organism process;nitrogen compound metabolic process;primary metabolic process;protein metabolic process;protein modif…	cell part;cytoplasm;cytosol;extracellular organelle;intracellular membrane-bounded organelle;intracellular non-membrane-bounded organelle;intracellular organelle;macromolecular complex;nucleoplasm;nucleus;organelle;proteasome complex;protein complex;ribonucleoprotein complex;vesicle	Proteasome	Proteasome_A_N	12	12	12	67.1	67.1	67.1	25.898	0	86.185	2464200000	83	9	9	10	12	5	6	4	4	8	9	7	A0A024RA52;P25787;C9JCK5;H3BT36;H7C402	A0A024RA52;P25787;C9JCK5	Proteasome subunit alpha type;Proteasome subunit alpha type-2	PSMA2		234;234;164;48;36
0.0307922	0.371569	-0.465761	-0.553082	-0.802691	-2.60843	-0.0307922	0.460777	0.74341	0.376062		biological regulation;cell death;cellular process;death	cell part;cytosol;intracellular membrane-bounded organelle;intracellular organelle;macromolecular complex;mitochondrion;organelle;protein complex;receptor complex			8	8	8	51.2	51.2	51.2	18.919	0	187.5	1555700000	57	6	4	6	6	0	5	7	6	5	7	5	A0A024RBT2;Q9NR28;H7BZQ7;H7BZK7;A0A2U3TZH2	A0A024RBT2;Q9NR28	Diablo homolog, mitochondrial	DIABLO		166;239;127;191;209
0	-0.204874	0.127481	0.0541153	0.21073	0.99589	-0.211887	-0.127935	-0.103848	-0.052496	binding;enzyme binding;polyubiquitin binding;proteasome binding;protein binding;protein complex binding;ribonucleoprotein binding;ribosome binding;small conjugating protein binding;ubiquitin binding;ubiquitin protein ligase binding	anatomical structure development;biological regulation;catabolic process;cell death;cell differentiation;cellular component assembly;cellular component organization;cellular localization;cellular metabolic process;cellular process;chromatin modification;chromatin organization;chromosome organization;death;developmental process;embryo development;establishment of localization;immune system process…	cell part;cytoplasm;cytosol;intracellular membrane-bounded organelle;intracellular organelle;macromolecular complex;nucleoplasm;nucleus;organelle;protein complex		UBQ	14	14	14	18.5	18.5	18.5	118.7	0	79.543	914290000	55	4	4	8	4	7	5	4	4	3	6	6	A0A024RCR6;A0A0G2JK23;P46379;A0A0G2JL47;F6S6P2;X6REW1;A0A0G2JJM1;H0Y4L1;F6UR09;F6U1F2;F6XTU0;H0Y710;A0A0G2JJR8;A0A1B0GX79;F6WML8;F6VEM6;F6X9W3;F6U341;F6TC96	A0A024RCR6;A0A0G2JK23;P46379;A0A0G2JL47;F6S6P2;X6REW1;A0A0G2JJM1	Large proline-rich protein BAG6	BAT3;BAG6		1126;1132;1132;1077;515;742;742;136;197;206;215;226;232;243;244;258;259;262;158
0.244449	-0.157054	0.264667	0.277177	0.519191	-1.77515	-0.159518	0.00887775	-0.092948	-0.013833	adenyl nucleotide binding;adenyl ribonucleotide binding;ATP binding;ATPase activity;ATPase activity, coupled;ATPase activity, coupled to movement of substances;binding;catalytic activity;cation binding;hydrolase activity;hydrolase activity, acting on acid anhydrides;hydrolase activity, acting on acid anhydrides, in phosphorus-containing anhydrides;ion binding;lipid transporter activity;magnesium …	biological regulation;cell activation;cell differentiation;cellular component organization;cellular membrane organization;cellular process;developmental process;establishment of localization;immune system process;ion transport;lipid transport;membrane organization;transmembrane transport;transport	cell part;endoplasmic reticulum;endosome;intracellular membrane-bounded organelle;intracellular organelle;membrane;organelle;plasma membrane			12	12	12	13.2	13.2	13.2	127.68	0	33.649	545320000	47	4	6	7	7	0	4	1	3	4	4	7	A0A067XG54;Q8NB49;H7C0E8	A0A067XG54;Q8NB49	Phospholipid-transporting ATPase;Phospholipid-transporting ATPase IG	ATP11C		1113;1132;202
0.0252867	-0.0897989	0.850112	-0.0252867	0.90203	-2.17017	0.0457964	0.169471	-0.615495	-0.306727			cell part;cytoplasm;cytoskeleton;intracellular non-membrane-bounded organelle;intracellular organelle;organelle		PLEC	19	19	18	27.9	27.9	27.2	553.12	0	102	313710000	51	8	12	6	8	0	5	1	0	3	3	5	A0A075B730;P58107	A0A075B730;P58107	Epiplakin	EPPK1		5063;5088
0.780661	-0.441642	0.158926	0	-0.374655	-2.19338	-0.612788	-0.784949	-0.946203	-0.395616					LisH	4	4	4	5.8	5.8	5.8	112.71	0	9.8889	40288000	5	0	2	1	0	0	0	0	0	0	0	2	A0A075B785;A0A2R8Y566;Q9P260;A0A075B768	A0A075B785;A0A2R8Y566;Q9P260	LisH domain and HEAT repeat-containing protein KIAA1468	KIAA1468		1017;1216;1216;255
-0.728098	0	-0.674193	-0.522388	-0.477278	-1.35271	0.05336	-0.0844746	0.19972	0.158318	binding;calcium ion binding;calcium-dependent cysteine-type endopeptidase activity;catalytic activity;cation binding;cysteine-type endopeptidase activity;cysteine-type peptidase activity;endopeptidase activity;hydrolase activity;ion binding;metal ion binding;peptidase activity;peptidase activity, acting on L-amino acid peptides	biological regulation;cellular component disassembly;cellular component organization;cellular process;extracellular matrix organization;extracellular structure organization;macromolecule metabolic process;metabolic process;primary metabolic process;protein metabolic process;proteolysis	cell part;cytoplasm;cytosol;extracellular organelle;membrane;organelle;plasma membrane;vesicle		EFh	4	4	4	31.9	31.9	31.9	15.958	0	38.349	126090000	19	1	1	3	1	0	2	3	2	2	3	1	K7EM73;K7EIV0;A0A075B7C0;K7ELJ7;A0A0C4DGQ5;P04632;U3KQE2;U3KPR7;K7EKD8	K7EM73;K7EIV0;A0A075B7C0;K7ELJ7;A0A0C4DGQ5;P04632;U3KQE2	Calpain small subunit 1	CAPNS1	1	163;196;197;278;322;268;161;100;238
0	0.0985374	0.465946	0.152544	0.419107	-2.11714	-1.50883	-1.54854	-1.60367	-1.44825	binding;cation binding;DNA binding;ion binding;metal ion binding;nucleic acid binding;nucleotide binding;transition metal ion binding;zinc ion binding	biological regulation	cell part;cytoplasm;intracellular membrane-bounded organelle;intracellular organelle;nucleoplasm;nucleus;organelle	Basal transcription factors	RRM;ZnF_RBZ	6	4	4	21.8	18.7	18.7	48.839	0	34.277	658010000	27	4	3	4	3	0	1	1	2	0	5	4	A0A075B7D9;Q92804;A0A075B7F4	A0A075B7D9;Q92804	TATA-binding protein-associated factor 2N	TAF15		449;592;214
-0.0704288	0.18924	0	-0.825106	-1.01518	-2.20274	0.400784	0.414251	0.378593	-0.154091	binding;calcium ion binding;cation binding;DNA binding;ion binding;metal ion binding;nucleic acid binding		cell part;cytosol;endoplasmic reticulum;extracellular organelle;extracellular space;Golgi apparatus;intracellular membrane-bounded organelle;intracellular organelle;membrane;nuclear envelope;organelle;plasma membrane;vesicle		EFh	5	5	5	20.4	20.4	20.4	40.368	0	18.212	195430000	19	4	2	3	0	0	2	1	2	1	2	2	E9PKG6;A0A087WSV8;P80303;Q2L696;E9PM22;E9PLR0;E9PLE9;A0A2R8Y6G7;E9PJP3;H0YD18;H0YEG8	E9PKG6;A0A087WSV8;P80303;Q2L696;E9PM22;E9PLR0;E9PLE9;A0A2R8Y6G7	Nucleobindin-2;Nesfatin-1	NUCB2;Nucb2		338;420;420;390;90;195;198;231;69;73;198
-0.437831	0.0670424	0.354344	-0.868659	-1.17713	0.393859	0.00265217	-0.00265217	-0.210799	0.335437	adenyl nucleotide binding;adenyl ribonucleotide binding;ATP binding;binding;catalytic activity;DNA binding;helicase activity;hydrolase activity;hydrolase activity, acting on acid anhydrides;hydrolase activity, acting on acid anhydrides, in phosphorus-containing anhydrides;nucleic acid binding;nucleoside-triphosphatase activity;nucleotide binding;purine nucleotide binding;purine ribonucleoside tri…	biological regulation;biosynthetic process;cell activation;cell division;cell proliferation;cellular component assembly;cellular component organization;cellular metabolic process;cellular nitrogen compound metabolic process;cellular process;chromatin modification;chromatin organization;chromosome organization;developmental process;DNA metabolic process;gene silencing;immune system process;macromo…	cell part;intracellular membrane-bounded organelle;intracellular organelle;nucleus;organelle		DEXDc;HELICc	2	2	2	2.9	2.9	2.9	81.035	0	4.0566	59058000	7	1	2	1	1	0	0	0	0	2	0	0	A0A087WSW7;F6XU50;A0A0B4J1V9;Q9NRZ9;B1ALG6	A0A087WSW7;F6XU50;A0A0B4J1V9;Q9NRZ9;B1ALG6	Lymphoid-specific helicase	HELLS		700;714;884;838;192
0.238169	0.112007	-0.549377	-0.292263	-0.112007	-2.42208	-0.456627	-0.756854	-0.718812	-0.597014	antioxidant activity;binding;catalytic activity;coenzyme binding;cofactor binding;disulfide oxidoreductase activity;electron carrier activity;flavin adenine dinucleotide binding;oxidoreductase activity;oxidoreductase activity, acting on a sulfur group of donors;oxidoreductase activity, acting on a sulfur group of donors, NAD or NADP as acceptor;oxidoreductase activity, acting on NADH or NADPH;pro…	anatomical structure formation involved in morphogenesis;biological regulation;biosynthetic process;cell proliferation;cellular homeostasis;cellular lipid metabolic process;cellular metabolic process;cellular nitrogen compound metabolic process;cellular process;developmental process;homeostatic process;lipid metabolic process;macromolecule metabolic process;metabolic process;nitrogen compound met…	cell part;cytosol;extracellular organelle;intracellular membrane-bounded organelle;intracellular non-membrane-bounded organelle;intracellular organelle;mitochondrion;nucleolus;nucleoplasm;organelle;vesicle	Pyrimidine metabolism;Selenocompound metabolism		7	7	7	27.8	27.8	27.8	53.166	0	40.174	128030000	14	2	2	3	2	0	0	1	0	1	0	3	E9PIR7;F8W809;A0A087WSW9;A0A182DWI3;A0A087WSY9;Q16881;E2QRB9;E9PKD3;E9PQI3;E9PLT3;E9PKI4;A0A0B4J225;E9PIZ5	E9PIR7;F8W809;A0A087WSW9;A0A182DWI3;A0A087WSY9;Q16881;E2QRB9	Thioredoxin reductase 1, cytoplasmic	TXNRD1		482;498;548;568;648;649;460;175;53;70;72;103;139
0.063117	0.270802	-0.112124	0.049489	-0.00666523	-0.189504	-0.66307	0.274514	-0.140515	-0.179774	amine binding;amino acid binding;antioxidant activity;binding;carboxylic acid binding;catalytic activity;glutathione binding;glutathione peroxidase activity;modified amino acid binding;oxidoreductase activity;oxidoreductase activity, acting on paired donors, with incorporation or reduction of molecular oxygen;oxidoreductase activity, acting on peroxide as acceptor;peptide binding;peroxidase activ…	aging;amine metabolic process;biological regulation;catabolic process;cellular amino acid metabolic process;cellular ketone metabolic process;cellular lipid metabolic process;cellular metabolic process;cellular nitrogen compound metabolic process;cellular process;developmental process;lipid metabolic process;metabolic process;multicellular organismal development;multicellular organismal process;n…	cell part;cytosol;extracellular organelle;intracellular membrane-bounded organelle;intracellular organelle;mitochondrion;nucleus;organelle;vesicle	Glutathione metabolism		6	6	6	39.3	39.3	39.3	22.024	0	24.089	494710000	27	3	2	3	3	0	1	2	3	1	5	4	A0A087X2I2;A0A087WT12;P36969;K7ERP4;K7EJ20;A0A0A0MTT1;K7EKX7;R4GNE4;K7ENB4;A0A087X247	A0A087X2I2;A0A087WT12;P36969;K7ERP4;K7EJ20;A0A0A0MTT1;K7EKX7;R4GNE4;K7ENB4	Glutathione peroxidase;Phospholipid hydroperoxide glutathione peroxidase, mitochondrial	GPX4		196;233;197;155;242;166;175;179;180;134
-0.214001	0	-0.941706	-0.717235	-0.905383	-2.15436	-0.589934	0.407566	0.371943	-0.552991	binding;catalytic activity;cation binding;intramolecular transferase activity;intramolecular transferase activity, phosphotransferases;ion binding;isomerase activity;magnesium ion binding;metal ion binding;phosphoacetylglucosamine mutase activity;phosphoglucomutase activity	alcohol metabolic process;anatomical structure development;biosynthetic process;carbohydrate metabolic process;cellular metabolic process;cellular nitrogen compound metabolic process;cellular process;developmental process;macromolecule metabolic process;macromolecule modification;metabolic process;multicellular organismal process;nitrogen compound metabolic process;nucleobase-containing compound …	cell part;cytosol	Amino sugar and nucleotide sugar metabolism		4	4	4	13.4	13.4	13.4	49.094	0	42.478	116200000	9	1	2	1	0	0	0	1	1	0	1	2	A0A087WT27;J3KN95;O95394;H0Y8I3;H0Y987	A0A087WT27;J3KN95;O95394;H0Y8I3;H0Y987	Phosphoacetylglucosamine mutase	PGM3		441;461;542;113;197
-0.662406	-0.565877	-0.488682	-0.599758	-1.00887	-2.71346	0.889355	0.395775	0	-0.331422	acyl-CoA hydrolase activity;acyl-CoA thioesterase activity;binding;carboxylic ester hydrolase activity;catalytic activity;CoA hydrolase activity;hydrolase activity;hydrolase activity, acting on ester bonds;palmitoyl-CoA hydrolase activity;protein binding;receptor binding;thiolester hydrolase activity	cellular ketone metabolic process;cellular lipid metabolic process;cellular metabolic process;cellular process;cofactor metabolic process;lipid metabolic process;metabolic process;organic acid metabolic process;primary metabolic process;small molecule metabolic process	cell part;cytosol;extracellular organelle;intracellular membrane-bounded organelle;intracellular organelle;mitochondrion;organelle;vesicle	Biosynthesis of unsaturated fatty acids		2	2	2	5.2	5.2	5.2	46.292	0.0005898	3.5419	41768000	3	0	0	0	0	0	2	1	0	0	0	0	A0A087X0W7;A0A087WT95;Q86TX2;P49753;G3V4F2;A0A2R8Y7H3	A0A087X0W7;A0A087WT95;Q86TX2;P49753;G3V4F2;A0A2R8Y7H3	Acyl-coenzyme A thioesterase 1;Acyl-coenzyme A thioesterase 2, mitochondrial	ACOT2;ACOT1		421;463;421;483;395;421
-0.373455	-0.295715	-0.198763	-0.0806561	0.12962	0.207726	0.0364666	0.307859	0.36554	0	binding;nucleic acid binding;protein binding;RNA binding;translation factor activity, nucleic acid binding;translation initiation factor activity;translation initiation factor binding	anatomical structure development;biological regulation;biosynthetic process;cell development;cellular metabolic process;cellular process;developmental process;macromolecule metabolic process;metabolic process;primary metabolic process;protein metabolic process;regulation of translation;response to abiotic stimulus;response to chemical stimulus;response to endogenous stimulus;response to heat;resp…	cell part;cytoplasm;cytosol;macromolecular complex;protein complex	RNA transport		14	14	14	37.9	37.9	37.9	57.495	0	46.686	683590000	66	6	7	8	8	4	6	5	3	6	6	7	A0A087WTA5;Q9UI10;E7ERK9;A0A087WW69;F8W8L6;H7C2L8;F8WEV6	A0A087WTA5;Q9UI10;E7ERK9	Translation initiation factor eIF-2B subunit delta	EIF2B4		520;523;544;228;235;194;12
-0.460732	-0.57765	-0.0752544	-0.101124	1.03849	-2.69809	0.244198	-0.794223	-0.61826	0		biological adhesion;cell adhesion;cellular process	cell part;extracellular organelle;organelle;vesicle		FN3;IG;IGc2	8	8	8	6.2	6.2	6.2	240	0	28.919	87422000	12	0	1	2	3	0	1	0	0	1	3	1	F8W6X9;A0A087WTQ6;Q7Z5N4;H7C255	F8W6X9;A0A087WTQ6;Q7Z5N4	Protein sidekick-1	SDK1	1	2193;2213;2213;107
-0.19272	-0.114479	0.344734	0.462673	0.557644	0.718784	-0.174362	0	0.14007	-0.234852	binding;mRNA binding;nucleic acid binding;nucleotide binding;poly(A) RNA binding;poly(U) RNA binding;poly-purine tract binding;poly-pyrimidine tract binding;protein binding;protein C-terminus binding;RNA binding;single-stranded RNA binding;translation activator activity;translation regulator activity;translation regulator activity, nucleic acid binding	biological regulation;biosynthetic process;catabolic process;cell maturation;cellular metabolic process;cellular nitrogen compound metabolic process;cellular process;developmental maturation;developmental process;gene silencing;macromolecule metabolic process;metabolic process;mRNA metabolic process;mRNA processing;nitrogen compound metabolic process;nucleobase-containing compound metabolic proce…	cell part;cytoplasm;cytosol;extracellular organelle;intracellular membrane-bounded organelle;intracellular non-membrane-bounded organelle;intracellular organelle;macromolecular complex;membrane;nucleus;organelle;ribonucleoprotein complex;spliceosomal complex;vesicle	mRNA surveillance pathway;RNA degradation;RNA transport	PolyA;RRM;RRM_1	32	32	17	56.3	56.3	32.2	58.535	0	323.31	9460100000	215	21	25	27	20	19	17	13	14	16	16	27	A0A087WTT1;P11940;E7EQV3;E7ERJ7;H0YAR2;Q9H361;E5RGH3;E5RJB9;H0YAP2;H0YBN4;E5RH24;H0YB86;Q4VXU2;H0YAS6;H0YB75;H0YAS7;H0YC10;E5RHG7;E5RGC4;E5RFD8;H0YAW6	A0A087WTT1;P11940;E7EQV3;E7ERJ7	Polyadenylate-binding protein;Polyadenylate-binding protein 1	PABPC1		522;636;591;604;284;631;108;129;131;174;118;165;614;169;183;136;42;75;43;61;187
-0.819664	-0.412258	-0.652046	-0.335571	-0.164156	0.636829	0.661705	0.455177	0.459078	0.34981	catalytic activity;oxidoreductase activity;oxidoreductase activity, acting on the CH-NH group of donors;oxidoreductase activity, acting on the CH-NH group of donors, NAD or NADP as acceptor;pyrroline-5-carboxylate reductase activity	amine metabolic process;biosynthetic process;cellular amino acid metabolic process;cellular ketone metabolic process;cellular metabolic process;cellular nitrogen compound metabolic process;cellular process;heterocycle metabolic process;metabolic process;nitrogen compound metabolic process;organic acid metabolic process;primary metabolic process;small molecule metabolic process	cell part;cytoplasm	Arginine and proline metabolism		7	7	3	33.3	33.3	10.2	25.868	0	92.483	746660000	55	1	4	5	6	4	6	7	5	6	5	6	A0A087WTV6;Q96C36;A0A087WZR9	A0A087WTV6;Q96C36;A0A087WZR9	Pyrroline-5-carboxylate reductase 2;Pyrroline-5-carboxylate reductase	PYCR2		246;320;319
0.181446	-0.521232	-0.755661	0.585989	0	-2.73992	-0.668741	-0.835177	-0.531691	-0.0948353		cellular process;establishment of localization;transport;vesicle-mediated transport	cell part;cytoplasm;Golgi apparatus;intracellular membrane-bounded organelle;intracellular non-membrane-bounded organelle;intracellular organelle;membrane;nucleolus;nucleus;organelle			2	2	2	14.8	14.8	14.8	23.241	0	9.9185	78863000	7	0	0	2	1	0	1	0	1	1	0	1	H0YI50;A0A087WU02;Q96RQ1;H0YHJ8;H0YI58;F8W0R1;F8VPA6	H0YI50;A0A087WU02;Q96RQ1;H0YHJ8;H0YI58;F8W0R1;F8VPA6	Endoplasmic reticulum-Golgi intermediate compartment protein 2	ERGIC2	3	209;386;377;57;163;172;220
0	0.0149307	0.419998	-0.0386925	-0.120871	0.244122	-0.106197	0.495409	-0.197861	-0.186777	3'-5' exonuclease activity;4 iron, 4 sulfur cluster binding;binding;catalytic activity;cation binding;chromatin binding;DNA binding;DNA polymerase activity;DNA-directed DNA polymerase activity;enzyme binding;exonuclease activity;hydrolase activity;hydrolase activity, acting on ester bonds;ion binding;iron-sulfur cluster binding;kinase binding;metal cluster binding;metal ion binding;nuclease activ…	biological regulation;biosynthetic process;cell cycle;cell proliferation;cellular component organization;cellular metabolic process;cellular nitrogen compound metabolic process;cellular process;chromosome organization;DNA metabolic process;DNA recombination;DNA repair;DNA replication;homeostatic process;macromolecule metabolic process;metabolic process;mitotic cell cycle;nitrogen compound metabol…	cell part;cytoplasm;intracellular membrane-bounded organelle;intracellular non-membrane-bounded organelle;intracellular organelle;macromolecular complex;nuclear envelope;nucleolus;nucleoplasm;nucleus;organelle;protein complex	DNA replication;Purine metabolism;Pyrimidine metabolism	POLBc	12	12	12	13.3	13.3	13.3	165.77	0	30.623	286270000	28	3	6	4	6	1	2	1	1	0	1	3	A0A087WU64;A6NMQ1;P09884	A0A087WU64;A6NMQ1;P09884	DNA polymerase;DNA polymerase alpha catalytic subunit	POLA1		1461;1468;1462
-0.00842667	-0.0389347	-0.108557	0	-0.0095005	-0.810198	0.215326	0.199615	0.0713043	0.0332279		biological regulation;cellular process;coagulation;establishment of localization;membrane docking;multicellular organismal process;protein transport;regulation of body fluid levels;transport	cell part;Golgi apparatus;intracellular membrane-bounded organelle;intracellular organelle;membrane;organelle	Endocytosis		11	11	11	32.2	32.2	32.2	50.736	0	47.727	552270000	59	7	5	7	9	1	5	5	3	2	7	8	A0A087WU65;A0A2R8YE10;Q9NRW7;A0A2R8YD95;A0A2R8YF01;A0A1B0GXI6;B7Z7G7;A0A2R8YEX8	A0A087WU65;A0A2R8YE10;Q9NRW7;A0A2R8YD95;A0A2R8YF01;A0A1B0GXI6	Vacuolar protein sorting-associated protein 45	VPS45		447;534;570;643;434;467;198;158
-0.009058	0.009058	-0.036068	0.281301	0.121719	-1.95407	-0.618767	-0.634155	0.054285	-0.450798	binding;enzyme binding;protein binding	biological regulation;cell death;cellular metabolic process;cellular nitrogen compound metabolic process;cellular process;death;immune system process;macromolecule metabolic process;metabolic process;mRNA metabolic process;mRNA processing;nitrogen compound metabolic process;nucleobase-containing compound metabolic process;primary metabolic process;RNA metabolic process;RNA processing;RNA splicing	cell part;cytoplasm;intracellular membrane-bounded organelle;intracellular organelle;macromolecular complex;membrane;nucleoplasm;nucleus;organelle;protein complex;ribonucleoprotein complex;spliceosomal complex	Spliceosome		9	9	9	15.8	15.8	15.8	65.702	0	40.038	445300000	46	5	5	10	5	1	2	0	2	3	7	6	A0A087WUB9;Q8WYA6;A2A2P1	A0A087WUB9;Q8WYA6	Beta-catenin-like protein 1	CTNNBL1		568;563;166
0	0.165136	0.430767	0.411234	0.350885	-0.305145	-0.767416	-0.10397	-0.490011	-0.107559	binding;DNA binding;double-stranded DNA binding;mRNA binding;nucleic acid binding;nucleotide binding;poly(A) RNA binding;poly(G) RNA binding;poly-purine tract binding;RNA binding;single-stranded DNA binding;single-stranded RNA binding;structure-specific DNA binding	biological regulation;biosynthetic process;cellular metabolic process;cellular nitrogen compound metabolic process;cellular process;macromolecule metabolic process;metabolic process;nitrogen compound metabolic process;nucleobase-containing compound metabolic process;primary metabolic process;RNA metabolic process;RNA processing	cell part;cytoplasm;extracellular organelle;intracellular membrane-bounded organelle;intracellular organelle;macromolecular complex;nucleoplasm;nucleus;organelle;ribonucleoprotein complex;spliceosomal complex;vesicle		RRM	15	13	13	39.1	38.6	38.6	40.04	0	126.07	5539500000	115	9	14	12	15	7	8	8	7	7	15	13	A0A087WUK2;O14979	A0A087WUK2;O14979	Heterogeneous nuclear ribonucleoprotein D-like	HNRNPDL		363;420
-0.235014	-0.0535927	0.344517	0.260569	0	-2.23177	-0.640818	-0.478293	-0.276976	-0.683195	binding;cation binding;DNA binding;ion binding;metal ion binding;nucleic acid binding;transition metal ion binding;zinc ion binding	anatomical structure development;biological regulation;cell death;cell differentiation;cellular process;death;developmental process	cell part;cytoplasm;intracellular membrane-bounded organelle;intracellular organelle;nucleus;organelle		ZnF_C2HC	6	6	6	14	14	14	80.101	0	29.011	146740000	23	3	2	2	3	0	2	2	1	2	3	3	A0A087WXK2;A0A087WUL4;A0A087WX23;Q86TG7;A0A087WZG9;B4DSP0	A0A087WXK2;A0A087WUL4;A0A087WX23;Q86TG7;A0A087WZG9;B4DSP0	Retrotransposon-derived protein PEG10	PEG10		707;741;783;708;359;401
0.0255699	0.563089	0.424372	0.0692844	-0.0255699	-2.3119	-0.366714	-0.322895	0.0679512	-0.38294	binding;nucleic acid binding;nucleotide binding	anatomical structure development;anatomical structure morphogenesis;biological regulation;biosynthetic process;cell development;cell motility;cellular component morphogenesis;cellular component movement;cellular component organization;cellular metabolic process;cellular nitrogen compound metabolic process;cellular process;developmental process;locomotion;macromolecule metabolic process;metabolic …	cell part;cytoplasmic membrane-bounded vesicle;intracellular membrane-bounded organelle;intracellular organelle;macromolecular complex;mitochondrion;nucleus;organelle;ribonucleoprotein complex;vesicle		RRM	4	4	4	52.6	52.6	52.6	8.6918	0	25.296	214200000	22	3	3	4	2	0	0	0	1	2	2	5	H0YJW7;A0A087WUN7;H0YJ40;G3V4X6;G3V2S9;Q9GZT3;H0YJ07;H0YJU7	H0YJW7;A0A087WUN7;H0YJ40;G3V4X6;G3V2S9;Q9GZT3;H0YJ07;H0YJU7	SRA stem-loop-interacting RNA-binding protein, mitochondrial	SLIRP		76;92;96;98;124;109;56;72
0.0773506	0	-0.179176	-0.246393	-0.0596733	-2.72735	-0.0192184	0.372459	-0.581586	0.716661	amine binding;amino acid binding;antioxidant activity;binding;carboxylic acid binding;catalytic activity;glutathione binding;glutathione peroxidase activity;modified amino acid binding;oxidoreductase activity;oxidoreductase activity, acting on paired donors, with incorporation or reduction of molecular oxygen;oxidoreductase activity, acting on peroxide as acceptor;peptide binding;peroxidase activ…	aging;amine metabolic process;anatomical structure development;anatomical structure formation involved in morphogenesis;anatomical structure morphogenesis;biological regulation;catabolic process;cell development;cell differentiation;cell motility;cell proliferation;cellular amino acid metabolic process;cellular aromatic compound metabolic process;cellular component movement;cellular homeostasis;c…	cell part;cytoplasm;cytosol;extracellular organelle;intracellular membrane-bounded organelle;intracellular organelle;mitochondrion;nucleus;organelle;vesicle	Arachidonic acid metabolism;Glutathione metabolism		4	4	4	27.4	27.4	27.4	16.914	0	7.0168	130560000	10	0	0	0	1	1	0	1	0	3	2	2	A0A2R8Y6B6;A0A087WUQ6;P07203	A0A2R8Y6B6;A0A087WUQ6;P07203	Glutathione peroxidase;Glutathione peroxidase 1	GPX1		157;202;203
0.079505	-1.47509	-0.352818	0.868428	0.86412	-1.7499	0.380849	-1.48084	-0.847674	-0.079505	binding;nucleotide binding;protein binding;structural constituent of ribosome;structural molecule activity;translation initiation factor binding	biological regulation;biosynthetic process;catabolic process;cellular component disassembly;cellular component organization;cellular metabolic process;cellular nitrogen compound metabolic process;cellular process;establishment of localization;homeostatic process;macromolecule metabolic process;metabolic process;mRNA metabolic process;nitrogen compound metabolic process;nucleobase-containing compo…	cell part;cytoplasm;cytosol;intracellular membrane-bounded organelle;intracellular non-membrane-bounded organelle;intracellular organelle;macromolecular complex;membrane;nucleolus;nucleus;organelle;ribonucleoprotein complex;ribosome;small ribosomal subunit	Ribosome		3	3	3	26.7	26.7	26.7	15.197	0	8.5483	544260000	19	1	2	2	2	1	3	0	1	2	2	3	E7ETK0;A0A2R8Y849;A0A087WUS0;A0A2R8YD14;P62847;A0A2R8Y8A0	E7ETK0;A0A2R8Y849;A0A087WUS0;A0A2R8YD14;P62847;A0A2R8Y8A0	40S ribosomal protein S24	RPS24		131;131;132;165;133;90
0.236952	-0.0451984	0.100401	1.24768	0.797544	0.819715	0	-0.298538	-0.22571	-0.149864	binding;catalytic activity;GTP binding;GTPase activity;guanyl nucleotide binding;guanyl ribonucleotide binding;hydrolase activity;hydrolase activity, acting on acid anhydrides;hydrolase activity, acting on acid anhydrides, in phosphorus-containing anhydrides;nucleic acid binding;nucleoside-triphosphatase activity;nucleotide binding;purine nucleotide binding;purine ribonucleoside triphosphate bind…	biological regulation;biosynthetic process;cellular metabolic process;cellular process;macromolecule metabolic process;metabolic process;primary metabolic process;protein metabolic process;regulation of translation;translation;translational initiation	cell part;cytoplasm;cytosol	RNA transport		10	10	10	13.5	13.5	13.5	138.68	0	49.286	463370000	18	0	0	4	6	3	1	1	1	0	2	0	A0A087WUT6;O60841	A0A087WUT6;O60841	Eukaryotic translation initiation factor 5B	EIF5B		1220;1220
-0.612112	-0.0286751	0.20439	0.0370102	0.0663662	-1.89672	-0.325668	-0.983838	-0.00482941	0.00482941	binding;cation binding;enzyme binding;identical protein binding;ion binding;K63-linked polyubiquitin binding;metal ion binding;molecular transducer activity;polyubiquitin binding;protein binding;protein dimerization activity;protein domain specific binding;protein heterodimerization activity;protein homodimerization activity;signal transducer activity;small conjugating protein binding;ubiquitin b…	biological regulation;biosynthetic process;cell death;cellular metabolic process;cellular nitrogen compound metabolic process;cellular process;death;establishment of localization;homeostatic process;immune system process;macromolecule metabolic process;macromolecule modification;metabolic process;multi-organism process;nitrogen compound metabolic process;nucleobase-containing compound metabolic p…	cell part;cytoplasm;cytosol;intracellular;intracellular membrane-bounded organelle;intracellular non-membrane-bounded organelle;intracellular organelle;macromolecular complex;nucleus;organelle;protein complex;ubiquitin ligase complex	Acute myeloid leukemia;Adipocytokine signaling pathway;Apoptosis;B cell receptor signaling pathway;Chagas disease (American trypanosomiasis);Chemokine signaling pathway;Chronic myeloid leukemia;Cytosolic DNA-sensing pathway;Epithelial cell signaling in Helicobacter pylori infection;Hepatitis C;MAPK signaling pathway;NOD-like receptor signaling pathway;Osteoclast differentiation;Pancreatic cancer;…		3	3	3	13.1	13.1	13.1	47.256	0	16.721	72988000	11	2	2	1	1	0	2	1	0	0	1	1	A0A087X0G7;A0A087WUW6;A0A087X1B1;Q9Y6K9;A0A087WV30;C9JH59;C9J2V2;C9JN51	A0A087X0G7;A0A087WUW6;A0A087X1B1;Q9Y6K9	NF-kappa-B essential modulator	IKBKG		411;412;418;419;115;172;195;250
-0.187416	-0.135153	0.459553	0.208508	0.63891	0.859562	0.152781	-0.0197773	-0.097435	0	actin binding;ankyrin binding;binding;cytoskeletal protein binding;enzyme binding;GTPase binding;lipid binding;phospholipid binding;protein binding;structural constituent of cytoskeleton;structural molecule activity	biological regulation;cellular component assembly;cellular component organization;cellular membrane organization;cellular metabolic process;cellular process;cytokinesis;establishment of localization;Golgi vesicle transport;locomotion;macromolecule metabolic process;macromolecule modification;membrane organization;metabolic process;nuclear transport;nucleocytoplasmic transport;phosphorus metabolic…	cell part;cytoplasm;cytoskeleton;cytosol;extracellular organelle;intracellular non-membrane-bounded organelle;intracellular organelle;macromolecular complex;nucleolus;organelle;protein complex;vesicle		CH;PH;SPEC	49	49	45	26.8	26.8	24.7	274.83	0	263.22	2344100000	203	15	27	24	35	11	20	7	6	12	26	20	A0A087WUZ3;Q01082;F8W6C1	A0A087WUZ3;Q01082	Spectrin beta chain, non-erythrocytic 1	SPTBN1		2366;2364;690
-0.186626	0.10865	-0.179302	-0.156601	-0.0613155	-3.13779	-0.0242443	0.492712	0.384293	0.101885	adenyl nucleotide binding;adenyl ribonucleotide binding;adenylate kinase activity;ATP binding;ATPase activity;binding;catalytic activity;hydrolase activity;hydrolase activity, acting on acid anhydrides;hydrolase activity, acting on acid anhydrides, in phosphorus-containing anhydrides;kinase activity;nucleobase-containing compound kinase activity;nucleoside-triphosphatase activity;nucleotide bindi…	cellular metabolic process;cellular nitrogen compound metabolic process;cellular process;metabolic process;nitrogen compound metabolic process;nucleobase-containing compound metabolic process;nucleobase-containing small molecule metabolic process;nucleotide metabolic process;phosphorus metabolic process;primary metabolic process;small molecule metabolic process	cell part;membrane;nucleoplasm			3	3	3	32.1	32.1	32.1	12.545	0	7.6454	251360000	19	2	2	2	2	1	2	2	1	2	2	1	A0A087WVD7;Q9Y3D8;D6RDH4;A0A087WY94	A0A087WVD7;Q9Y3D8;D6RDH4	Adenylate kinase isoenzyme 6	TAF9;AK6		109;172;141;47
0	-0.64463	-0.33839	-0.841152	-0.530462	1.78703	0.800133	0.536488	0.464516	0.376633	adenyl nucleotide binding;adenyl ribonucleotide binding;ATP binding;binding;catalytic activity;formate-tetrahydrofolate ligase activity;identical protein binding;ligase activity;ligase activity, forming carbon-nitrogen bonds;methylenetetrahydrofolate dehydrogenase (NADP+) activity;nucleotide binding;oxidoreductase activity;oxidoreductase activity, acting on the CH-NH group of donors;oxidoreductas…	biosynthetic process;cellular aromatic compound metabolic process;cellular ketone metabolic process;cellular metabolic process;cellular nitrogen compound metabolic process;cellular process;cofactor metabolic process;heterocycle metabolic process;metabolic process;nitrogen compound metabolic process;one-carbon metabolic process;organic acid metabolic process;small molecule metabolic process	cell part;intracellular membrane-bounded organelle;intracellular organelle;membrane;mitochondrion;organelle	One carbon pool by folate		15	14	14	20.5	19.4	19.4	99.31	0	25.77	471350000	44	5	4	2	3	7	5	4	3	4	2	5	A0A087WVM4;B7ZM99;Q6UB35;Q4VXM0;H0Y327;Q4VXM1;Q5JYA8;Q5JYA3	A0A087WVM4;B7ZM99;Q6UB35	Monofunctional C1-tetrahydrofolate synthase, mitochondrial	MTHFD1L		913;979;978;92;332;57;108;114
-0.189734	-0.464432	0.365116	0.345039	0.724237	2.01233	0.285955	-0.0330639	-0.168324	0	binding;clathrin binding;clathrin light chain binding;double-stranded RNA binding;enzyme binding;kinase binding;nucleic acid binding;protein binding;protein kinase binding;RNA binding;structural molecule activity	cell differentiation;cellular component organization;cellular membrane organization;cellular metabolic process;cellular process;developmental process;endocytosis;establishment of localization;Golgi vesicle transport;immune system process;ion transport;macromolecule metabolic process;membrane invagination;membrane organization;metabolic process;mitosis;nuclear division;organelle fission;organelle …	cell part;cytoplasm;cytoplasmic membrane-bounded vesicle;cytosol;extracellular organelle;intracellular membrane-bounded organelle;intracellular non-membrane-bounded organelle;intracellular organelle;macromolecular complex;membrane;mitochondrion;organelle;plasma membrane;protein complex;vesicle	Bacterial invasion of epithelial cells;Endocrine and other factor-regulated calcium reabsorption;Endocytosis;Huntington's disease;Lysosome	CLH	88	88	69	63	63	52.9	192.06	0	323.31	17363000000	613	43	78	83	80	53	44	33	38	43	53	65	A0A087WVQ6;Q00610;J3KS13;K7EJJ5;J3KSQ2;J3KRF5;J3QL20;F5H5N6;A0A087WV74;A0A087WXH4	A0A087WVQ6;Q00610	Clathrin heavy chain;Clathrin heavy chain 1	CLTC	3	1679;1675;612;222;122;131;97;169;369;463
-0.690191	-0.393665	-0.496458	-0.0234194	-0.0259352	1.13254	0.187842	0.0234194	-0.210374	-0.0867758	receptor activity	biosynthetic process;cell differentiation;cellular metabolic process;cellular process;developmental process;establishment of localization;macromolecule metabolic process;metabolic process;primary metabolic process;protein metabolic process;protein transport;translation;transport	cell part;endoplasmic reticulum;intracellular membrane-bounded organelle;intracellular non-membrane-bounded organelle;intracellular organelle;macromolecular complex;membrane;organelle;ribonucleoprotein complex;ribosome	Protein processing in endoplasmic reticulum		4	4	4	9.1	9.1	9.1	84.325	0	12.006	46848000	16	0	1	2	2	2	2	2	2	2	1	0	F8W7S5;A0A087WVV2;Q9P2E9;A0A087WU26	F8W7S5;A0A087WVV2;Q9P2E9	Ribosome-binding protein 1	RRBP1		751;934;1410;346
-0.398146	-0.0974331	-0.180483	-0.0598755	0.172844	0.031311	0.0189457	-0.254	0.0655994	0.0181446	binding;catalytic activity;DNA binding;DNA-directed RNA polymerase activity;nucleic acid binding;nucleotidyltransferase activity;RNA polymerase activity;transferase activity;transferase activity, transferring phosphorus-containing groups	biological regulation;biosynthetic process;cellular metabolic process;cellular nitrogen compound metabolic process;cellular process;developmental process;DNA metabolic process;DNA repair;immune system process;macromolecule metabolic process;metabolic process;mRNA metabolic process;mRNA processing;nitrogen compound metabolic process;nucleobase-containing compound metabolic process;primary metaboli…	cell part;cytosol;intracellular membrane-bounded organelle;intracellular organelle;macromolecular complex;nucleoplasm;nucleus;organelle;protein complex;RNA polymerase complex	Cytosolic DNA-sensing pathway;Huntington's disease;Purine metabolism;Pyrimidine metabolism;RNA polymerase		6	6	6	46.7	46.7	46.7	21.459	0	31.235	336180000	26	3	3	2	3	0	2	2	0	3	3	5	A0A087WVZ9;P19388;A0A0A0MQR7;A0A087WWX0;A0A087WVN5	A0A087WVZ9;P19388;A0A0A0MQR7;A0A087WWX0	DNA-directed RNA polymerases I, II, and III subunit RPABC1	POLR2E		184;210;204;134;83
0.300836	-0.644177	0.0510893	0.606488	-1.21984	-2.36316	-0.168712	-0.301021	-0.750103	-0.651827		biological regulation;cell division;cellular component organization;cellular process;mitosis;nuclear division;organelle fission;organelle organization;regulation of cell cycle;regulation of mitotic cell cycle	cell part;centrosome;cytoplasm;intracellular non-membrane-bounded organelle;intracellular organelle;microtubule organizing center;midbody;organelle		TPR	4	4	4	2.5	2.5	2.5	256.86	0	6.8761	36225000	8	1	0	3	1	0	0	0	0	0	1	2	A0A087WW06;Q96AY4;B0QYP5	A0A087WW06;Q96AY4	Tetratricopeptide repeat protein 28	TTC28		2354;2481;301
0.145247	0.346319	0.046257	-0.1611	-0.568529	-2.57661	-0.156322	0.462931	0.0403519	-0.0403519	binding;carboxylic acid binding;catalytic activity;fatty acid binding;identical protein binding;lipid binding;lysophosphatidic acid acyltransferase activity;lysophospholipid acyltransferase activity;monocarboxylic acid binding;protein binding;protein dimerization activity;protein homodimerization activity;transferase activity;transferase activity, transferring acyl groups;transferase activity, tr…	biological regulation;biosynthetic process;catabolic process;cell communication;cell death;cellular component assembly;cellular component organization;cellular ketone metabolic process;cellular lipid metabolic process;cellular membrane organization;cellular metabolic process;cellular process;death;lipid metabolic process;macromolecular complex assembly;macromolecule metabolic process;membrane org…	cell part;cytoplasm;extracellular organelle;macromolecular complex;membrane;midbody;organelle;protein complex;vesicle	Endocytosis	BAR;SH3	7	6	6	23.9	21.8	21.8	44.26	0	56.709	181960000	22	2	1	3	2	0	2	2	2	1	3	4	A0A087WW40;Q9Y371	A0A087WW40;Q9Y371	Endophilin-B1	SH3GLB1		394;365
-0.14913	-0.0486126	0.46257	0.446964	0.532578	1.85992	0	0.151392	-0.10853	-0.0291615	enzyme regulator activity	biological regulation;catabolic process;cell cycle;cell death;cellular metabolic process;cellular nitrogen compound metabolic process;cellular process;death;immune system process;macromolecule metabolic process;macromolecule modification;metabolic process;mitotic cell cycle;nitrogen compound metabolic process;primary metabolic process;protein metabolic process;protein modification by small protei…	cell part;cytosol;extracellular organelle;macromolecular complex;membrane;nucleoplasm;organelle;proteasome complex;protein complex;vesicle	Proteasome		28	28	28	42.1	42.1	42.1	105.85	0	151.29	1589400000	97	8	14	17	14	10	4	4	4	4	7	11	A0A087WW66;Q99460;H7C378;C9J9M4;H7BZR6	A0A087WW66;Q99460	26S proteasome non-ATPase regulatory subunit 1	PSMD1		953;953;192;203;164
-0.179173	-0.277777	0.0299911	-0.0612164	0	0.576113	-0.117819	-0.0375919	0.039196	0.25642	binding;enzyme activator activity;enzyme binding;enzyme regulator activity;GTPase activator activity;GTPase regulator activity;kinase binding;nucleoside-triphosphatase regulator activity;protein binding;protein kinase binding;structural molecule activity	anatomical structure morphogenesis;biological regulation;cellular component assembly;cellular component morphogenesis;cellular component organization;cellular process;cytoskeleton organization;developmental process;establishment of localization;establishment or maintenance of cell polarity;exocytosis;Golgi vesicle transport;macromolecular complex assembly;organelle organization;protein complex as…	cell part;cell projection;cytoplasm;cytoskeleton;intracellular non-membrane-bounded organelle;intracellular organelle;membrane;neuron projection;organelle	Tight junction	WD40	18	18	18	21.2	21.2	21.2	114.43	0	85.22	1130400000	68	4	8	10	10	3	5	3	3	5	9	8	A0A087WW77;Q15334	A0A087WW77;Q15334	Lethal(2) giant larvae protein homolog 1	LLGL1		1056;1064
0.0310736	-0.301183	-0.128386	-0.236054	0.21547	-2.43936	-0.0681372	0.138021	-0.0310736	0.136468	binding;identical protein binding;protein binding	biological adhesion;biological regulation;cell adhesion;cellular component organization;cellular process;extracellular matrix organization;extracellular structure organization;locomotion;regulation of transport;response to chemical stimulus;response to external stimulus;response to stimulus;signal transduction	cell body;cell part;cell projection;cell surface;cytoplasm;extracellular organelle;membrane;neuron projection;neuronal cell body;organelle;plasma membrane;site of polarized growth;vesicle	Cell adhesion molecules (CAMs);Prion diseases	FN3;IG;IGc2	21	21	21	38.3	38.3	38.3	97.344	0	245.12	3555100000	153	15	13	18	21	0	13	8	6	14	26	19	A0A087WWD4;P13591;A0A087WTF6;A0A087WX77;A0A087WV75;H7BYX6;A0A087WTE4;A0A0D9SF98;A0A087WWJ5;A0A087WVU1;A0A087X1V2;A0A0C4DGS4;A0A0D9SF30;A0A087WTR3;A0A087WZS4;A0A087WVD0	A0A087WWD4;P13591;A0A087WTF6;A0A087WX77;A0A087WV75;H7BYX6;A0A087WTE4	Neural cell adhesion molecule 1	NCAM1	1	884;858;848;858;884;725;761;357;372;305;228;165;468;84;135;133
0.0517635	0	-0.0973549	-0.0471077	-0.00635147	-0.0918484	0.0272026	0.225372	0.197866	0.0255756	binding;catalytic activity;DNA binding;DNA polymerase activity;DNA-directed DNA polymerase activity;nucleic acid binding;nucleotidyltransferase activity;transferase activity;transferase activity, transferring phosphorus-containing groups	biological regulation;biosynthetic process;cell cycle;cellular component organization;cellular metabolic process;cellular nitrogen compound metabolic process;cellular process;chromosome organization;detection of stimulus;DNA metabolic process;DNA recombination;DNA repair;DNA replication;homeostatic process;macromolecule metabolic process;metabolic process;mitotic cell cycle;nitrogen compound meta…	cell part;DNA polymerase complex;intracellular membrane-bounded organelle;intracellular organelle;macromolecular complex;nucleoplasm;nucleus;organelle;protein complex	Base excision repair;DNA replication;Homologous recombination;Mismatch repair;Nucleotide excision repair;Purine metabolism;Pyrimidine metabolism		7	7	7	23.8	23.8	23.8	54.695	0	63.745	361940000	37	6	5	3	3	2	4	4	4	2	1	3	A0A087WWF6;P49005;F8W8R3;C9IZD2;C9J8Z7;C9JLE1;C9JHC7;H7C1B3	A0A087WWF6;P49005;F8W8R3	DNA polymerase delta subunit 2	POLD2		504;469;455;148;155;220;257;83
-0.528254	-0.520523	-0.48405	-0.278322	-0.0313053	-2.45482	0.334776	-0.807136	-0.715408	0.386206		cellular process;establishment of localization;Golgi vesicle transport;transport;vesicle-mediated transport	cell part;cytosol;endoplasmic reticulum;Golgi apparatus;intracellular membrane-bounded organelle;intracellular organelle;macromolecular complex;membrane;organelle;protein complex			2	2	2	10.1	10.1	10.1	21.231	0.00058207	3.3979	133430000	6	0	1	1	2	0	1	0	0	1	0	0	A0A087WWM0;O43617;A0A087WYS5;A6NKE1	A0A087WWM0;O43617;A0A087WYS5;A6NKE1	Trafficking protein particle complex subunit 3	TRAPPC3		188;180;114;118
-0.747225	0	-0.401171	-0.114672	0.373638	-2.39353	-0.789578	0.517527	-0.715768	0.645243	binding;nucleic acid binding;nucleotide binding	anatomical structure development;anatomical structure morphogenesis;biological regulation;developmental process;multicellular organismal process;viral reproduction	cell part;membrane;nucleoplasm		RRM	4	4	4	5.4	5.4	5.4	102.13	0	8.5698	43224000	13	0	1	2	3	2	0	1	0	2	1	1	A0A087WWP4;Q96T37	A0A087WWP4;Q96T37	Putative RNA-binding protein 15	RBM15		933;977
-0.737994	0.0387602	-0.72042	-0.644771	-0.92491	-3.09992	0.429051	0.277507	-0.273892	-0.471552	binding;DNA binding;nucleic acid binding;RNA binding	biological regulation;biosynthetic process;cell death;cellular metabolic process;cellular nitrogen compound metabolic process;cellular process;death;DNA metabolic process;establishment of localization;interspecies interaction between organisms;macromolecule metabolic process;metabolic process;mRNA metabolic process;mRNA processing;multi-organism process;nitrogen compound metabolic process;nuclear…	cell part;cytoplasm;intracellular membrane-bounded organelle;intracellular organelle;macromolecular complex;nucleoplasm;nucleus;organelle;protein complex;THO complex;transcription export complex	RNA transport;Spliceosome	DEATH	4	4	4	8.1	8.1	8.1	75.651	0	6.7431	48230000	10	1	0	2	1	1	2	0	1	0	1	1	A0A087WWS1;Q96FV9;J3KRD7;R4GN58;J3QQZ3;J3KT14;R4GMN4;A0A087WY84	A0A087WWS1;Q96FV9	THO complex subunit 1	THOC1		657;657;86;95;121;251;272;360
0.00230598	0.509644	0	-0.130844	-0.736456	-2.45232	-0.250456	0.230829	0.0907555	0.231714				Cardiac muscle contraction;Dilated cardiomyopathy;Hypertrophic cardiomyopathy (HCM);Pathways in cancer;Thyroid cancer		16	16	0	61.7	61.7	0	26.42	0	323.31	3798400000	113	14	12	14	8	0	8	12	9	11	10	15	A0A087WWU8;D6R904;K7EP68;K7ERG3;A0A2R8YEU4;D6RFM2;H0YL80;H0YKX5;H0YKP3;A0A2R8YHD2;K7EPV9;K7EMU5	A0A087WWU8;D6R904		TPM3		227;95;138;170;173;49;68;142;157;90;96;102
-0.300474	-0.240623	-0.373631	-0.516861	0	1.9449	0.90781	0.950697	0.86231	0.780905	structural constituent of ribosome;structural molecule activity	biosynthetic process;catabolic process;cellular component disassembly;cellular component organization;cellular metabolic process;cellular nitrogen compound metabolic process;cellular process;establishment of localization;macromolecule metabolic process;metabolic process;mRNA metabolic process;nitrogen compound metabolic process;nucleobase-containing compound metabolic process;primary metabolic pr…	cell part;cytosol;intracellular membrane-bounded organelle;intracellular organelle;macromolecular complex;nucleus;organelle;ribonucleoprotein complex	Ribosome		11	11	11	47.9	47.9	47.9	19.586	0	28.119	1147400000	41	4	2	3	1	5	6	5	5	7	1	2	A0A087WXM6;J3QQT2;J3KRX5;A0A0A6YYL6;P18621;J3KRB3;A0A087WWH0;J3QS96;J3QLC8;A0A0A0MRF8;A0A087WY81;J3KSJ0	A0A087WXM6;J3QQT2;J3KRX5;A0A0A6YYL6;P18621;J3KRB3;A0A087WWH0;J3QS96;J3QLC8;A0A0A0MRF8;A0A087WY81	60S ribosomal protein L17	RPL17;RPL17-C18orf32	3	169;171;174;228;184;129;131;138;174;190;97;56
-0.0311556	0.103076	-0.10883	-1.51856	-0.0440168	-2.54262	-0.39701	0.0311556	0.110486	0.0503836	binding;extracellular matrix binding;laminin binding;laminin receptor activity;molecular transducer activity;protein binding;protein C-terminus binding;receptor activity;signal transducer activity;signaling receptor activity;transmembrane signaling receptor activity	biological adhesion;biological regulation;cell adhesion;cellular process;response to stimulus;signal transduction	cell part;extracellular organelle;membrane;organelle;plasma membrane;vesicle		IG;IGc2	5	5	5	12.9	12.9	12.9	63.693	0	13.768	123710000	14	3	1	1	1	0	0	1	2	2	2	1	A0A087WXM8;P50895;K7ENU8	A0A087WXM8;P50895	Basal cell adhesion molecule	BCAM	1	588;628;286
0.917473	0.891642	-0.0834961	0.522467	0.277819	-1.79453	0	-0.24349	-0.812402	-0.100109	[acetyl-CoA carboxylase] kinase activity;[hydroxymethylglutaryl-CoA reductase (NADPH)] kinase activity;adenyl nucleotide binding;adenyl ribonucleotide binding;AMP-activated protein kinase activity;ATP binding;binding;catalytic activity;cation binding;chromatin binding;histone kinase activity;histone serine kinase activity;ion binding;kinase activity;metal ion binding;nucleotide binding;phosphotra…	alcohol metabolic process;amine transport;amino acid transport;autophagy;biological regulation;biosynthetic process;catabolic process;cell communication;cellular component organization;cellular ketone metabolic process;cellular lipid metabolic process;cellular metabolic process;cellular nitrogen compound metabolic process;cellular process;chromatin modification;chromatin organization;chromosome o…	cell part;cytoplasm;cytosol;macromolecular complex;nucleoplasm;protein complex	Adipocytokine signaling pathway;Hypertrophic cardiomyopathy (HCM);Insulin signaling pathway;mTOR signaling pathway;Regulation of autophagy	S_TKc	5	4	4	16.7	13.6	13.6	62.319	0	17.992	113800000	16	3	1	4	2	0	1	0	0	0	1	4	A0A087WXX9;P54646	A0A087WXX9;P54646	5-AMP-activated protein kinase catalytic subunit alpha-2	PRKAA2		552;552
-0.505041	-0.521024	0	0.148592	0.52055	-2.427	-0.703485	-0.866517	-0.357364	-0.479684	binding;nucleic acid binding;nucleotide binding				RRM	4	4	4	48	48	48	10.713	0	9.6154	47323000	11	0	2	3	1	0	0	0	1	0	1	3	A0A087WY03;E5RFV3	A0A087WY03;E5RFV3		SREK1		100;132
1.09141	1.60955	1.27612	-0.0184669	0	-2.55275	-1.63085	-0.85742	-0.612188	-0.295021	acid-amino acid ligase activity;adenyl nucleotide binding;adenyl ribonucleotide binding;ATP binding;binding;catalytic activity;ligase activity;ligase activity, forming carbon-nitrogen bonds;nucleotide binding;purine nucleotide binding;purine ribonucleoside triphosphate binding;purine ribonucleotide binding;ribonucleotide binding;small conjugating protein ligase activity;ubiquitin-protein ligase a…	biological regulation;biosynthetic process;catabolic process;cell death;cellular metabolic process;cellular nitrogen compound metabolic process;cellular process;death;DNA metabolic process;DNA repair;immune system process;macromolecule metabolic process;macromolecule modification;metabolic process;nitrogen compound metabolic process;nucleobase-containing compound metabolic process;primary metabol…	cell part;cytosol;extracellular organelle;macromolecular complex;membrane;nucleoplasm;organelle;plasma membrane;protein complex;ubiquitin ligase complex;vesicle	Protein processing in endoplasmic reticulum;Ubiquitin mediated proteolysis		2	2	1	42.9	42.9	24.5	11.065	0	14.058	142610000	15	3	2	2	1	0	2	0	1	2	1	1	D6RFM0;D6RAH7;H9KV45;A0A0A0MQU3;A0A087WY85;P62837;P61077	D6RFM0;D6RAH7;H9KV45;A0A0A0MQU3;A0A087WY85;P62837;P61077	Ubiquitin-conjugating enzyme E2 D2;Ubiquitin-conjugating enzyme E2 D3	UBE2D2;UBE2D3		98;118;141;147;148;147;147
-0.191898	0	0.391073	0.568863	0.327641	-1.79425	-0.240643	0.453379	-0.0235863	0.0878582	binding;carbohydrate binding;catalytic activity;cation binding;glucose binding;identical protein binding;ion binding;metal ion binding;monosaccharide binding;nucleotide binding;nucleotidyltransferase activity;protein binding;pyrimidine nucleotide binding;pyrimidine ribonucleotide binding;ribonucleotide binding;sugar binding;transferase activity;transferase activity, transferring phosphorus-contai…	alcohol metabolic process;biosynthetic process;carbohydrate metabolic process;cellular ketone metabolic process;cellular metabolic process;cellular nitrogen compound metabolic process;cellular process;energy reserve metabolic process;generation of precursor metabolites and energy;macromolecule metabolic process;metabolic process;nitrogen compound metabolic process;nucleobase-containing compound m…	cell part;cytosol;extracellular organelle;intracellular membrane-bounded organelle;intracellular organelle;nucleus;organelle;vesicle	Amino sugar and nucleotide sugar metabolism;Galactose metabolism;Pentose and glucuronate interconversions;Starch and sucrose metabolism		7	7	5	17.7	17.7	11.8	56.967	0	57.895	624460000	26	4	4	3	5	0	0	1	2	1	2	4	A0A087WYS1;E7EUC7;Q16851;C9JQU9	A0A087WYS1;E7EUC7;Q16851	UTP--glucose-1-phosphate uridylyltransferase	UGP2		508;517;508;175
0.101724	0.147517	-0.183389	-0.334424	-0.919627	-2.10699	-0.0519934	0.231765	0.402068	-0.150418	binding;catalytic activity;DNA polymerase activity;intramolecular oxidoreductase activity;isomerase activity;nucleotidyltransferase activity;prostaglandin-E synthase activity;protein binding;RNA-directed DNA polymerase activity;telomerase activity;transferase activity;transferase activity, transferring phosphorus-containing groups;unfolded protein binding	anatomical structure development;biological regulation;biosynthetic process;carbohydrate metabolic process;cell proliferation;cellular component organization;cellular ketone metabolic process;cellular lipid metabolic process;cellular metabolic process;cellular nitrogen compound metabolic process;cellular process;chromosome organization;developmental process;DNA metabolic process;DNA replication;e…	cell part;cytoplasm;cytosol;extracellular organelle;intracellular membrane-bounded organelle;intracellular organelle;macromolecular complex;nucleoplasm;nucleus;organelle;ribonucleoprotein complex;telomerase holoenzyme complex;vesicle			7	7	7	50	50	50	19.155	0	99.42	750710000	35	6	2	2	2	0	3	4	5	3	4	4	A0A087WYT3;Q15185;B4DDC6	A0A087WYT3;Q15185	Prostaglandin E synthase 3	PTGES3		164;160;124
-0.367615	-0.407686	0.20558	0.185129	0.671232	0.385427	-0.166647	-0.202065	-0.0610008	0	binding;nucleic acid binding;nucleotide binding		cell part;cytoplasm;intracellular membrane-bounded organelle;intracellular organelle;nucleus;organelle		RRM	14	14	14	30.9	30.9	30.9	77.843	0	62.477	1010400000	65	5	7	6	9	2	6	3	5	8	11	3	A0A087WZ13;E9PAU2;Q8IY67;K7EKR9;K7EQG2	A0A087WZ13;E9PAU2;Q8IY67	Ribonucleoprotein PTB-binding 1	RAVER1		739;756;606;96;157
-0.270025	0.210846	0.136868	0.328419	0	-2.36582	-0.42104	-0.0302734	-0.845446	-0.656196	catalytic activity;endonuclease activity;endonuclease activity, active with either ribo- or deoxyribonucleic acids and producing 5'-phosphomonoesters;endoribonuclease activity;endoribonuclease activity, producing 5'-phosphomonoesters;hydrolase activity;hydrolase activity, acting on ester bonds;nuclease activity;ribonuclease activity;ribonuclease H activity	biological regulation;catabolic process;cellular metabolic process;cellular nitrogen compound metabolic process;cellular process;developmental process;embryo development;macromolecule metabolic process;metabolic process;nitrogen compound metabolic process;nucleobase-containing compound metabolic process;nucleobase-containing small molecule metabolic process;nucleotide metabolic process;primary me…	cell part;intracellular membrane-bounded organelle;intracellular organelle;macromolecular complex;nucleoplasm;nucleus;organelle;protein complex	DNA replication		5	5	5	31.1	31.1	31.1	28.736	0	34.973	143060000	23	3	3	3	2	0	1	1	1	2	4	3	A0A2R8YCP1;A0A2R8Y883;A0A2R8YCX2;A0A2R8Y761;A0A087WZJ6;A0A2R8YCJ4;A0A2R8YGP2;A0A2R8Y6Y1;A0A2R8Y7R8;Q5TBB1;A0A2R8YEC1;A0A2R8Y4S2;A0A2R8Y687;A0A2R8YE60;A0A2R8Y6M7;A0A2R8Y7Q3;A0A087WXR7;A0A2R8Y6Q6;A0A2R8YEH2;A0A2R8Y7A3;A0A2R8YEQ4;A0A2R8YEU9;A0A2R8YEB4;A0A2R8Y459;A0A2R8YEK5	A0A2R8YCP1;A0A2R8Y883;A0A2R8YCX2;A0A2R8Y761;A0A087WZJ6;A0A2R8YCJ4;A0A2R8YGP2;A0A2R8Y6Y1;A0A2R8Y7R8;Q5TBB1;A0A2R8YEC1;A0A2R8Y4S2;A0A2R8Y687;A0A2R8YE60;A0A2R8Y6M7;A0A2R8Y7Q3;A0A087WXR7;A0A2R8Y6Q6;A0A2R8YEH2	Ribonuclease H2 subunit B	RNASEH2B		254;266;273;289;289;293;309;320;355;312;227;229;238;243;263;268;282;300;324;47;48;104;128;164;76
0.0483208	-0.204609	-0.240034	-0.342108	-0.691771	-0.402691	0.704294	0.814825	0.897144	0.441929	binding;catalytic activity;cation binding;coenzyme binding;cofactor binding;electron carrier activity;ion binding;isocitrate dehydrogenase (NAD+) activity;isocitrate dehydrogenase activity;magnesium ion binding;metal ion binding;NAD binding;nucleotide binding;oxidoreductase activity;oxidoreductase activity, acting on CH-OH group of donors;oxidoreductase activity, acting on the CH-OH group of dono…	catabolic process;cellular ketone metabolic process;cellular metabolic process;cellular nitrogen compound metabolic process;cellular process;cofactor metabolic process;heterocycle metabolic process;metabolic process;nitrogen compound metabolic process;nucleobase-containing compound metabolic process;nucleobase-containing small molecule metabolic process;nucleotide metabolic process;organic acid m…	cell part;intracellular membrane-bounded organelle;intracellular organelle;mitochondrion;nucleus;organelle	Citrate cycle (TCA cycle)		12	12	12	31.3	31.3	31.3	42.41	0	38.8	1620200000	84	7	6	9	6	1	9	7	8	11	10	10	A0A087WZN1;O43837;A0A087X2E5;A0A0D9SG66	A0A087WZN1;O43837;A0A087X2E5	Isocitrate dehydrogenase [NAD] subunit, mitochondrial;Isocitrate dehydrogenase [NAD] subunit beta, mitochondrial	IDH3B		387;385;376;145
0.149416	-0.105858	0.0433006	0.111567	0.611694	-2.42765	0	-0.752717	-0.47497	-0.344429		biological regulation;biosynthetic process;cellular metabolic process;cellular nitrogen compound metabolic process;cellular process;macromolecule metabolic process;metabolic process;nitrogen compound metabolic process;nucleobase-containing compound metabolic process;primary metabolic process;RNA metabolic process	cell part;cytoplasm;intracellular membrane-bounded organelle;intracellular organelle;nucleus;organelle		SAM	5	5	5	15.2	15.2	15.2	72.413	0	19.169	52302000	13	0	2	3	3	0	0	0	0	0	3	2	A0A087WZT0;M0QZ22;Q5PRF9;M0R0X3;M0QXV2;M0QY61	A0A087WZT0;M0QZ22;Q5PRF9	Protein Smaug homolog 2	SAMD4B		663;692;694;325;75;219
-0.676844	-0.137925	0.681579	-0.579314	0.137925	-1.7613	-0.80011	-0.719896	-0.59159	-0.2525	adenyl nucleotide binding;adenyl ribonucleotide binding;ATP binding;ATPase activity;binding;catalytic activity;cytoskeletal protein binding;DNA binding;hydrolase activity;hydrolase activity, acting on acid anhydrides;hydrolase activity, acting on acid anhydrides, in phosphorus-containing anhydrides;microtubule motor activity;motor activity;nucleic acid binding;nucleoside-triphosphatase activity;n…	anatomical structure development;anatomical structure formation involved in morphogenesis;anatomical structure morphogenesis;biological regulation;cell differentiation;cellular component assembly;cellular component morphogenesis;cellular component movement;cellular component organization;cellular localization;cellular macromolecular complex assembly;cellular process;coagulation;cytokinesis;cytosk…	cell part;cell projection;centrosome;chromosome;cilium;cytoplasm;cytoplasmic membrane-bounded vesicle;cytoskeleton;cytosol;extracellular organelle;intracellular membrane-bounded organelle;intracellular non-membrane-bounded organelle;intracellular organelle;intraflagellar transport particle;macromolecular complex;membrane;microtubule organizing center;midbody;neuron projection;nucleoplasm;nucleus;…		KISc	3	3	3	5.3	5.3	5.3	80.354	0	4.0575	46855000	5	0	2	1	0	0	0	0	0	0	1	1	J3KPF9;A0A087X011;E9PES4;Q9Y496;H7C2F6;Q5JRK0;H0Y718;Q6ZMV9;O95239;Q2VIQ3	J3KPF9;A0A087X011;E9PES4;Q9Y496;H7C2F6	Kinesin-like protein;Kinesin-like protein KIF3A	KIF3A		702;725;726;699;185;161;689;814;1232;1234
-0.129723	0	-0.0867462	0.238047	0.630632	0.434086	-0.355776	0.103703	-0.00555038	-0.0329094	binding;cytoskeletal protein binding;microtubule binding;nucleic acid binding;protein binding;ribonucleoprotein binding;ribosome binding;RNA binding;rRNA binding;tubulin binding	anatomical structure development;biological regulation;cell motility;cell proliferation;cellular component assembly;cellular component movement;cellular component organization;cellular macromolecular complex assembly;cellular metabolic process;cellular nitrogen compound metabolic process;cellular process;developmental process;immune system process;locomotion;macromolecular complex assembly;macrom…	cell part;cytoplasm;intracellular membrane-bounded organelle;intracellular non-membrane-bounded organelle;intracellular organelle;nucleolus;nucleoplasm;nucleus;organelle	Ribosome biogenesis in eukaryotes		3	3	3	17.2	17.2	17.2	28.864	0	6.1263	103130000	15	0	3	3	3	0	1	0	1	1	1	2	A0A087X020;Q9Y3A5	A0A087X020;Q9Y3A5	Ribosome maturation protein SBDS	SBDS		250;250
-0.0740986	0.163046	0.0879669	-0.250467	-0.783002	-2.88854	0	-0.597449	-0.807492	-0.57739	binding;G-protein coupled receptor activity;molecular transducer activity;opioid receptor activity;peptide binding;peptide receptor activity;peptide receptor activity, G-protein coupled;receptor activity;signal transducer activity;signaling receptor activity;transmembrane signaling receptor activity	biological regulation;cellular process;response to stimulus;signal transduction	cell part;cytoplasm;intracellular membrane-bounded organelle;intracellular organelle;membrane;nucleus;organelle			2	2	2	6.7	6.7	6.7	44.756	0	6.5618	54512000	5	2	2	0	0	0	0	0	0	0	0	1	A0A087X028;A0A0A0MRN5;Q9NZT2	A0A087X028;A0A0A0MRN5;Q9NZT2	Opioid growth factor receptor	OGFR		390;625;677
0.693727	0.179827	0.458374	-0.036684	-0.65807	-3.74307	0.212706	-0.0429726	-0.200928	0	adenyl nucleotide binding;adenyl ribonucleotide binding;ATP binding;binding;chaperone binding;nucleotide binding;protein binding;purine nucleotide binding;purine ribonucleoside triphosphate binding;purine ribonucleotide binding;ribonucleotide binding	biological regulation;cellular component organization;cellular membrane organization;cellular metabolic process;cellular process;endocytosis;establishment of localization;macromolecule metabolic process;membrane invagination;membrane organization;metabolic process;primary metabolic process;protein metabolic process;response to chemical stimulus;response to stimulus;response to stress;signal trans…	cell part;endoplasmic reticulum;extracellular organelle;extracellular region;intracellular membrane-bounded organelle;intracellular organelle;membrane;organelle;vesicle	Protein processing in endoplasmic reticulum		33	33	33	43.9	43.9	43.9	104.78	0	323.31	5384800000	192	25	29	22	15	0	13	8	12	14	22	32	A0A087X054;Q9Y4L1;E9PJ21;A0A087WWI4;K7EQK2;J3KTF1;J3QL06;Q9BST8;J3QQH7;J3QLE9;A0A087X214;A0A087WW13	A0A087X054;Q9Y4L1;E9PJ21;A0A087WWI4;K7EQK2	Hypoxia up-regulated protein 1	HYOU1	3	937;999;656;677;678;224;211;147;149;154;92;102
-0.51215	0.107803	0	0.164228	0.172621	0.667177	0.106873	-0.567329	-0.275158	-0.04636	binding;cation binding;ion binding;metal ion binding;nucleic acid binding;nucleotide binding;RNA binding	biological regulation;cellular metabolic process;cellular nitrogen compound metabolic process;cellular process;macromolecule metabolic process;metabolic process;mRNA metabolic process;mRNA processing;nitrogen compound metabolic process;nucleobase-containing compound metabolic process;primary metabolic process;RNA metabolic process;RNA processing			RRM;ZnF_C3H1	5	5	4	5.8	5.8	4.7	113.79	0	11.744	122770000	19	2	3	2	5	0	1	0	0	1	2	3	A0A087X0H9;Q5T8P6	A0A087X0H9;Q5T8P6	RNA-binding protein 26	RBM26		1009;1007
0.0793896	-0.462983	0.0633926	0.164495	-0.0633926	1.62029	0.774103	-0.408669	-0.140234	-0.316896		anatomical structure formation involved in morphogenesis;biological regulation;cell death;cell junction organization;cellular component assembly;cellular component disassembly;cellular component organization;cellular homeostasis;cellular process;circulatory system process;death;developmental process;homeostatic process;membrane organization;multicellular organismal process;neurological system pro…	apical part of cell;cell part;cytoplasm;cytosol;intracellular membrane-bounded organelle;intracellular organelle;membrane;nucleus;organelle;plasma membrane	Adherens junction;Epithelial cell signaling in Helicobacter pylori infection;Gap junction;Tight junction;Vibrio cholerae infection	GuKc;PDZ;SH3;ZU5	5	5	5	5	5	5	187.85	0	14.723	106050000	13	1	0	1	1	2	2	0	0	1	1	4	A0A087X0K9;G5E9E7;G3V1L9;Q07157;H0Y3R8	A0A087X0K9;G5E9E7;G3V1L9;Q07157	Tight junction protein ZO-1	TJP1		1676;1692;1768;1748;227
0	0.165876	0.048954	0.148115	0.548525	-0.657495	-0.155472	-0.960253	-0.0956402	-0.55205			cell part;cytoplasm;intracellular membrane-bounded organelle;intracellular organelle;membrane;nucleoplasm;nucleus;organelle;plasma membrane		DSRM;FHA	6	6	6	15.5	15.5	15.5	82.89	0	55.927	230930000	22	4	2	3	4	0	0	0	0	1	4	4	A0A087X0M4;Q9BWU0;A0A087WWF4;H7C256	A0A087X0M4;Q9BWU0	Kanadaptin	SLC4A1AP		742;796;273;157
-0.00138474	0.0493946	0	-0.639084	-1.12948	-2.63036	-0.601348	-0.540623	-0.680728	-0.574671						3	3	3	11.2	11.2	11.2	73.338	0	14.573	18389000	12	3	4	1	0	0	1	0	0	0	1	2	A0A087X0Q9;Q9BVL4	A0A087X0Q9;Q9BVL4	Selenoprotein O	SELO		668;669
0	-0.0202255	-0.77434	-0.397509	-1.0101	-1.81829	0.822071	0.435888	-0.545035	0.345907	binding;growth factor binding;platelet-derived growth factor binding;protein binding	biological adhesion;cell adhesion;cell differentiation;cellular component assembly;cellular component disassembly;cellular component organization;cellular process;developmental process;extracellular matrix organization;extracellular structure organization;locomotion;macromolecular complex assembly;macromolecule metabolic process;metabolic process;multicellular organismal process;protein complex a…	cell part;extracellular matrix;extracellular organelle;extracellular region;macromolecular complex;membrane;organelle;plasma membrane;protein complex;vesicle	ECM-receptor interaction;Focal adhesion;Protein digestion and absorption	VWA	4	4	4	5.6	5.6	5.6	108.34	0	10.506	79240000	9	1	2	0	0	0	3	1	0	1	0	1	A0A087X0S5;P12109	A0A087X0S5;P12109	Collagen alpha-1(VI) chain	COL6A1	1	1026;1028
0.0324354	-0.0685377	-0.0324354	-0.533994	-0.525561	-2.83348	0.0480261	0.434119	0.64881	0.21033	activating transcription factor binding;anion binding;binding;chromatin binding;core promoter proximal region DNA binding;core promoter proximal region sequence-specific DNA binding;DNA binding;enhancer binding;enhancer sequence-specific DNA binding;enzyme binding;histone deacetylase binding;identical protein binding;ion binding;kinase binding;NF-kappaB binding;nucleic acid binding;nucleic acid b…	aging;anatomical structure development;anatomical structure morphogenesis;biological regulation;cellular aldehyde metabolic process;cellular metabolic process;cellular process;developmental process;immune system process;macromolecule metabolic process;metabolic process;molting cycle;multicellular organismal process;multi-organism process;primary metabolic process;protein metabolic process;proteol…	cell part;cytoplasm;cytosol;I-kappaB/NF-kappaB complex;intracellular membrane-bounded organelle;intracellular organelle;macromolecular complex;nucleoplasm;nucleus;organelle;protein complex;transcription factor complex	Acute myeloid leukemia;Adipocytokine signaling pathway;Amoebiasis;Apoptosis;B cell receptor signaling pathway;Chagas disease (American trypanosomiasis);Chemokine signaling pathway;Chronic myeloid leukemia;Cytosolic DNA-sensing pathway;Epithelial cell signaling in Helicobacter pylori infection;Hepatitis C;ko05152;Leishmaniasis;MAPK signaling pathway;Measles;Neurotrophin signaling pathway;NOD-like …	IPT	4	4	4	15.4	15.4	15.4	42.868	0	20.764	105070000	23	4	3	2	2	0	1	2	3	2	2	2	Q2TAM5;E9PKH5;A0A087X0W8;Q04206;E9PI38;E9PQS6;E9PKV4;A0A087WVP0;E9PJR1;E9PRX2;E9PNV4;E9PMD5	Q2TAM5;E9PKH5;A0A087X0W8;Q04206;E9PI38;E9PQS6;E9PKV4;A0A087WVP0	Transcription factor p65	RELA		377;418;448;551;185;208;237;246;89;95;153;161
0.377063	0.462321	-0.10098	-0.470136	-0.918849	-2.5601	-0.272588	0.382491	0.0865831	-0.0865831	catalytic activity;oxidoreductase activity		cell part;membrane			7	7	7	32.2	32.2	32.2	42.619	0	42.896	353410000	42	5	5	4	4	0	3	2	3	7	4	5	A0A087X0Z7;H0YJ66;Q9Y394;H0YJE4;H0YJR8;G3V5J0	A0A087X0Z7;H0YJ66;Q9Y394;H0YJE4;H0YJR8	Dehydrogenase/reductase SDR family member 7	DHRS7		376;399;339;160;212;61
-0.133444	-0.0322685	0	-0.549515	-0.10745	-2.87492	-0.69814	0.923388	0.13829	-0.64208	adenyl nucleotide binding;adenyl ribonucleotide binding;ATP binding;binding;nucleotide binding;purine nucleotide binding;purine ribonucleoside triphosphate binding;purine ribonucleotide binding;ribonucleotide binding				CobW_C	4	4	4	17.6	17.6	17.6	38.769	0	13.371	73448000	12	2	1	1	2	0	0	1	1	1	1	2	A0A087X140;C9J3G2;Q9BRT8;Q8IUF1;A0A087WTC0;F8WEG4;A0A087WZQ3;F8WEU0;F2Z2T4;A0A087WWG3;A0A0A6YYH9;Q5RIB0;H0Y5V3;A0A0A0MRU4;Q5RIA9;Q5JTY5;Q4V339;A0A0B4J1T6;Q5RIB5;Q5JTY2;Q6NVZ8;A0A0B4J2E3;E7EUZ7;A0A087WYD2;A0A0B4J2F1;A0A087X1C0	A0A087X140;C9J3G2;Q9BRT8;Q8IUF1;A0A087WTC0;F8WEG4;A0A087WZQ3;F8WEU0;F2Z2T4;A0A087WWG3;A0A0A6YYH9;Q5RIB0;H0Y5V3;A0A0A0MRU4;Q5RIA9;Q5JTY5;Q4V339;A0A0B4J1T6;Q5RIB5;Q5JTY2;Q6NVZ8;A0A0B4J2E3;E7EUZ7;A0A087WYD2;A0A0B4J2F1	COBW domain-containing protein 1;COBW domain-containing protein 2;COBW domain-containing protein 5;COBW domain-containing protein 3;COBW domain-containing protein 6	CBWD1;CBWD2;CBWD3;CBWD5;CBWD7;CBWD6		347;376;395;395;160;180;180;182;250;347;375;376;376;376;395;395;395;77;113;160;180;180;182;182;359;137
-0.821262	-0.490019	-0.761631	-0.285656	0	1.5125	0.458839	0.613409	0.829914	0.0899677	binding;double-stranded RNA binding;nucleic acid binding;RNA binding	biological regulation;cellular localization;cellular process;establishment of localization;homeostatic process;interspecies interaction between organisms;localization;multi-organism process;transport	cell body;cell part;cell projection;cytoplasm;endoplasmic reticulum;extracellular organelle;intracellular membrane-bounded organelle;intracellular non-membrane-bounded organelle;intracellular organelle;macromolecular complex;membrane;neuron projection;neuronal cell body;nucleolus;organelle;plasma membrane;protein complex;ribonucleoprotein complex;vesicle		DSRM	8	8	8	21.3	21.3	21.3	54.945	0	16.889	296840000	26	1	1	4	3	5	2	3	2	2	2	1	A0A087X1A5;O95793;Q5JW30;Q5JW28;F6UDC6;G5EA18;E5RJN7;E7EVI1;A0A0A0MTC4;A0A0A0MTD1;F8VPI7;E7EPX0;A0A0A0MTC6;E7EVJ4;E9PH62;Q9NUL3	A0A087X1A5;O95793;Q5JW30	Double-stranded RNA-binding protein Staufen homolog 1	STAU1		493;577;494;199;129;291;320;390;398;473;479;491;504;511;538;570
0.0459213	0.491816	0.361139	0.267496	-0.0459213	-2.96472	-0.281067	-0.807683	-1.01596	-0.204943	catalytic activity;NADH dehydrogenase (quinone) activity;NADH dehydrogenase (ubiquinone) activity;NADH dehydrogenase activity;oxidoreductase activity;oxidoreductase activity, acting on NADH or NADPH;oxidoreductase activity, acting on NADH or NADPH, quinone or similar compound as acceptor	cellular metabolic process;cellular process;generation of precursor metabolites and energy;metabolic process;small molecule metabolic process	cell part;macromolecular complex;membrane;NADH dehydrogenase complex;protein complex	Alzheimer's disease;Huntington's disease;Oxidative phosphorylation;Parkinson's disease		3	3	3	53.5	53.5	53.5	11.965	0	4.454	130070000	9	1	1	1	2	0	1	0	0	0	2	1	A0A087X1G1;H7BYD0;Q16718;A0A087WXR5;F8WAS3;C9IZN5	A0A087X1G1;H7BYD0;Q16718;A0A087WXR5	NADH dehydrogenase [ubiquinone] 1 alpha subcomplex subunit 5	NDUFA5		101;112;116;77;70;93
0.622448	0.279448	0.545691	-0.348431	-1.1028	-2.39421	-0.855517	-0.279448	-0.946214	-0.861203	binding;selenium binding	cellular metabolic process;cellular process;macromolecule metabolic process;metabolic process;primary metabolic process;protein folding;protein metabolic process	cell part;extracellular organelle;organelle;vesicle			2	2	2	15.2	15.2	15.2	17.942	0	10.607	76405000	9	1	2	1	1	0	0	0	1	0	1	2	A0A087X1G7;O60613;A0A0J9YX89	A0A087X1G7;O60613;A0A0J9YX89	15 kDa selenoprotein	2020-09-15		164;165;88
0.398815	0.89386	-0.746788	-0.743887	-1.29122	-1.76038	0.0455761	0.187941	0.437714	-0.0455761	carboxylic ester hydrolase activity;catalytic activity;hydrolase activity;hydrolase activity, acting on ester bonds;lipase activity;lysophospholipase activity;palmitoyl-(protein) hydrolase activity;phospholipase activity;thiolester hydrolase activity	biological regulation;catabolic process;cellular ketone metabolic process;cellular lipid metabolic process;cellular metabolic process;cellular process;lipid metabolic process;macromolecule metabolic process;macromolecule modification;metabolic process;nitrogen compound metabolic process;organic acid metabolic process;primary metabolic process;protein metabolic process;protein modification process…	cell part;cytosol;extracellular organelle;intracellular membrane-bounded organelle;intracellular organelle;mitochondrion;organelle;vesicle	Glycerophospholipid metabolism		4	4	4	38.6	38.6	38.6	17.981	0	13.701	124280000	11	3	1	0	0	0	1	1	1	0	0	4	A0A087X1K9;E5RGR0;O75608;B4DP64;E5RJ48	A0A087X1K9;E5RGR0;O75608;B4DP64	Acyl-protein thioesterase 1	LYPLA1		166;197;230;196;90
-0.501815	-0.0679111	0.0979958	0.0679111	0.2901	-2.35895	-0.783385	-0.663664	-0.754144	-0.18829	catalytic activity;endonuclease activity;endonuclease activity, active with either ribo- or deoxyribonucleic acids and producing 5'-phosphomonoesters;endoribonuclease activity;endoribonuclease activity, producing 5'-phosphomonoesters;hydrolase activity;hydrolase activity, acting on ester bonds;nuclease activity;ribonuclease activity;ribonuclease P activity;tRNA-specific ribonuclease activity	cellular metabolic process;cellular nitrogen compound metabolic process;cellular process;macromolecule metabolic process;metabolic process;nitrogen compound metabolic process;nucleobase-containing compound metabolic process;primary metabolic process;RNA metabolic process;RNA processing;tRNA metabolic process;tRNA processing	cell part;intracellular membrane-bounded organelle;intracellular organelle;macromolecular complex;nucleus;organelle;ribonuclease P complex;ribonucleoprotein complex	Ribosome biogenesis in eukaryotes;RNA transport		2	2	2	12.9	12.9	12.9	34.676	0	10.864	37731000	11	1	2	2	2	0	0	0	0	1	2	1	X6RLL4;A0A087X1N3;O75818;F8WC38	X6RLL4;A0A087X1N3;O75818;F8WC38	Ribonuclease P protein subunit p40	RPP40		303;321;363;113
0	0.191151	0.305082	0.0134621	0.250793	-2.96204	-0.0396481	-0.520731	-0.237795	-0.582607	binding;identical protein binding;PDZ domain binding;protein binding;protein dimerization activity;protein domain specific binding;protein homodimerization activity;receptor binding	anatomical structure development;anatomical structure morphogenesis;biological adhesion;biological regulation;cell adhesion;cell death;cell differentiation;cell growth;cell junction organization;cell morphogenesis;cell recognition;cellular component assembly;cellular component morphogenesis;cellular component organization;cellular process;death;detection of stimulus;developmental process;growth;i…	cell part;cell projection;cytoplasmic membrane-bounded vesicle;extracellular organelle;intracellular membrane-bounded organelle;intracellular organelle;membrane;neuron projection;organelle;plasma membrane;vesicle	Cell adhesion molecules (CAMs)	4.1m;IG;IGc2	11	11	11	39.1	39.1	39.1	45.676	0	130.14	2117200000	56	8	10	8	7	0	5	1	2	3	7	5	A0A087X1W8;A0A0A0MTJ8;X5DQS5;Q9BY67;A0A087X0T8;F5H125;H0YG94;F5H8J9	A0A087X1W8;A0A0A0MTJ8;X5DQS5;Q9BY67;A0A087X0T8	Cell adhesion molecule 1	CADM1	1	412;413;443;442;346;182;188;110
-0.398643	0.160608	0.430677	0.136486	0.619198	-0.991331	-0.474169	0.110428	0	-0.48731		biological regulation;catabolic process;cell cycle;cell death;cellular metabolic process;cellular nitrogen compound metabolic process;cellular process;death;immune system process;macromolecule metabolic process;macromolecule modification;metabolic process;mitotic cell cycle;nitrogen compound metabolic process;primary metabolic process;protein metabolic process;protein modification by small protei…	cell part;cytosol;extracellular organelle;macromolecular complex;membrane;nucleoplasm;organelle;proteasome complex;protein complex;vesicle	Antigen processing and presentation;Proteasome		7	7	7	36.6	36.6	36.6	29.126	0	41.613	262720000	33	3	3	5	6	0	2	0	1	3	4	6	A0A087X1Z3;Q9UL46;H0YM70;H0YKU2	A0A087X1Z3;Q9UL46;H0YM70	Proteasome activator complex subunit 2	PSME2		254;239;228;85
0.282526	0.359625	0.192192	-0.0520439	0	-0.156143	0.38365	-0.175659	-0.491007	-0.057539		biological regulation;multicellular organismal process	cell part;cytoplasm;membrane;plasma membrane			12	12	12	17	17	17	102.28	0	76.179	393770000	30	5	3	5	2	0	2	3	2	1	3	4	A0A087X211;Q8TCG1;F8WAX6;F8WF26	A0A087X211;Q8TCG1	Protein CIP2A	KIAA1524		906;905;121;48
0.599636	-0.544777	-0.84584	0.0414238	-0.307711	-2.70384	-0.833298	-0.761593	-0.800975	-0.514717	binding;chemorepellent activity;ephrin receptor binding;protein binding;receptor binding	anatomical structure development;biological regulation;cellular process;developmental process;locomotion;regulation of organelle organization;regulation of protein modification process;regulation of transport;response to chemical stimulus;response to external stimulus;response to stimulus;signal transduction	cell part;extracellular region;membrane;plasma membrane	Axon guidance		2	2	2	19.1	19.1	19.1	21.709	0	5.9288	34895000	5	0	0	2	1	0	0	0	0	0	0	2	A0A087X240;D6RDV5;P52803	A0A087X240;D6RDV5;P52803	Ephrin-A5	EFNA5	1	188;201;228
-0.522305	0.132462	-0.633631	-0.630247	-1.10549	-2.58581	0.0124378	0.0365276	-0.228992	-0.0124378	actin binding;binding;cytoskeletal protein binding;protein binding	anatomical structure development;biological regulation;cellular component organization;cellular process;cytoskeleton organization;developmental process;organelle organization;regulation of transport;response to abiotic stimulus;response to external stimulus;response to stimulus;response to stress	cell part;cytoskeleton;extracellular organelle;intracellular non-membrane-bounded organelle;intracellular organelle;membrane;organelle;vesicle		CH	3	3	3	27.4	27.4	27.4	19.757	0	31.013	32096000	16	2	2	1	1	0	3	0	2	2	1	2	A0A087X271;B4DDF4;B4DUT8;Q99439;K7ES69;A0A087X1X5;H3BVI6	A0A087X271;B4DDF4;B4DUT8;Q99439;K7ES69	Calponin;Calponin-2	CNN2		179;298;330;309;148;191;218
0.557852	-0.991508	0.0590267	-0.0781212	-0.0261478	-0.435385	0.539951	-0.0788956	0.218071	0.386568		biological regulation;cellular process;regulation of cell cycle	cell part;cytoplasm;macromolecular complex;membrane;plasma membrane;protein complex		WD40	11	11	11	15	15	15	125	0	25.239	1804400000	33	2	5	5	4	1	5	1	4	2	1	3	A0A087X295;Q9NNW5;E9PDU5;E9PBK6;C9K020;E5RFX3;F8WE36;Q6PKC6	A0A087X295;Q9NNW5;E9PDU5	WD repeat-containing protein 6	WDR6		1151;1121;1070;569;271;61;68;289
0.0463467	-0.342161	0	0.295506	0.633896	-0.012289	0.0406647	-0.0811749	-0.165274	0.0649395		biosynthetic process;cellular component disassembly;cellular component organization;cellular metabolic process;cellular process;macromolecule metabolic process;metabolic process;mitochondrial translation;mitochondrion organization;organelle organization;primary metabolic process;protein metabolic process;translation;translational elongation;translational initiation	cell part;intracellular membrane-bounded organelle;intracellular non-membrane-bounded organelle;intracellular organelle;macromolecular complex;membrane;mitochondrion;organelle;ribonucleoprotein complex;ribosome		Tim44	7	7	7	32.4	32.4	32.4	35.29	0	17.495	367760000	15	0	2	4	2	1	1	1	0	1	1	2	A0A087X2D5;Q9BRJ2;A0A0G2JMS5;A0A087WU62	A0A087X2D5;Q9BRJ2;A0A0G2JMS5;A0A087WU62	39S ribosomal protein L45, mitochondrial	MRPL45		306;306;256;256
-0.386517	-0.294029	0	0.0129414	0.306181	0.962193	-0.0249519	0.462168	0.462696	-0.0361996	adenyl nucleotide binding;adenyl ribonucleotide binding;ATP binding;ATPase activity;binding;binding, bridging;catalytic activity;hydrolase activity;hydrolase activity, acting on acid anhydrides;hydrolase activity, acting on acid anhydrides, in phosphorus-containing anhydrides;nucleoside-triphosphatase activity;nucleotide binding;protein binding;protein binding, bridging;purine nucleotide binding;…	biological regulation;catabolic process;cell cycle;cell death;cellular metabolic process;cellular nitrogen compound metabolic process;cellular process;death;immune system process;macromolecule metabolic process;macromolecule modification;metabolic process;mitotic cell cycle;nitrogen compound metabolic process;primary metabolic process;protein catabolic process;protein metabolic process;protein mo…	cell part;cytosol;extracellular organelle;intracellular membrane-bounded organelle;intracellular organelle;macromolecular complex;membrane;nucleoplasm;nucleus;organelle;proteasome complex;protein complex;vesicle	Proteasome	AAA	19	19	19	58.6	58.6	58.6	45.796	0	139.38	1991900000	90	8	8	15	9	6	8	7	7	6	7	9	A0A087X2I1;P62333;H0YJC0;H0YJS8;H0YJT1;H0YJE9;H0YJX2;H0YJD2;H0YJY8	A0A087X2I1;P62333;H0YJC0	26S protease regulatory subunit 10B	PSMC6		403;389;262;194;97;70;67;33;36
-0.673428	-0.632516	-0.54039	-0.404955	-0.975976	-3.34455	-0.109209	0	0.346756	0.476135		biological adhesion;cell adhesion;cellular process	cell part;cytoplasm;membrane;plasma membrane	Cell adhesion molecules (CAMs);Leukocyte transendothelial migration		2	2	2	17.9	17.9	17.9	18.777	0.00058224	3.4016	134460000	6	0	1	0	1	0	0	0	1	2	0	1	A0A096LP69;P14209;A8MQT7	A0A096LP69;P14209;A8MQT7	CD99 antigen	CD99		184;185;177
0	0.0440617	-0.0368748	-0.656588	-1.08441	-1.43855	-0.0681477	0.386009	0.117712	0.0964317	catalytic activity;oxidoreductase activity;oxidoreductase activity, acting on the CH-NH group of donors;oxidoreductase activity, acting on the CH-NH group of donors, NAD or NADP as acceptor;pyrroline-5-carboxylate reductase activity	amine metabolic process;biosynthetic process;cellular amino acid metabolic process;cellular ketone metabolic process;cellular metabolic process;cellular nitrogen compound metabolic process;cellular process;heterocycle metabolic process;metabolic process;nitrogen compound metabolic process;organic acid metabolic process;primary metabolic process;small molecule metabolic process		Arginine and proline metabolism		3	3	3	15.7	15.7	15.7	29.892	0	14.291	208840000	18	2	2	1	1	0	1	2	2	3	2	2	A0A0A0MQS1;Q53H96;B5MD87	A0A0A0MQS1;Q53H96;B5MD87	Pyrroline-5-carboxylate reductase;Pyrroline-5-carboxylate reductase 3	PYCRL		286;274;137
-0.0535927	-0.0284824	-0.183018	-0.274256	-1.03355	-2.51048	0.838797	0.326199	0.518904	0.26615	binding;carbon-sulfur lyase activity;catalytic activity;cofactor binding;lyase activity;pyridoxal phosphate binding;selenocysteine lyase activity;transferase activity;vitamin B6 binding;vitamin binding	amine metabolic process;cellular amino acid metabolic process;cellular ketone metabolic process;cellular metabolic process;cellular nitrogen compound metabolic process;cellular process;lipid metabolic process;metabolic process;nitrogen compound metabolic process;organic acid metabolic process;primary metabolic process;response to chemical stimulus;response to endogenous stimulus;response to stimu…	cell part;cytosol	Selenocompound metabolism		3	3	3	19.1	19.1	19.1	26.198	0	4.3793	65778000	6	0	0	1	0	0	2	0	1	1	1	0	H7C3V9;H7C277;A0A0A0MQU4;Q96I15;H7C1S7;C9JNL5;H7C1N7	H7C3V9;H7C277;A0A0A0MQU4;Q96I15;H7C1S7;C9JNL5	Selenocysteine lyase	SCLY		241;251;453;445;168;170;122
-0.463057	-0.159126	0.427212	0.173758	0.494326	-2.94352	-0.696302	-0.647855	-0.807125	-0.148239	binding;cation binding;double-stranded RNA binding;ion binding;metal ion binding;nucleic acid binding;RNA binding	anatomical structure development;anatomical structure morphogenesis;biological regulation;cell differentiation;cellular component assembly;cellular component organization;cellular macromolecular complex assembly;cellular metabolic process;cellular nitrogen compound metabolic process;cellular process;developmental process;embryo development;macromolecular complex assembly;macromolecule metabolic p…	cell part;centrosome;cytoplasm;intracellular membrane-bounded organelle;intracellular non-membrane-bounded organelle;intracellular organelle;macromolecular complex;microtubule organizing center;nucleoplasm;nucleus;organelle;ribonucleoprotein complex		ZnF_C3H1	4	4	4	14.9	14.9	14.9	37.898	0	27.679	241220000	17	2	2	3	2	1	1	0	1	1	2	2	C9JP00;A0A0A0MQX8;Q9NR56;O95205;H7C4T5;Q86VM6;Q5VZF2;C9JCX1;H7C4Y1	C9JP00;A0A0A0MQX8;Q9NR56;O95205;H7C4T5;Q86VM6;Q5VZF2	Muscleblind-like protein 1;Muscleblind-like protein 2	MBNL1;MBLL;MBNL2		348;400;388;255;329;343;373;155;210
0.0213804	-0.0317278	-0.452085	-0.108033	-0.0213804	-2.25814	0.440278	0.6382	0.112361	0.658998		establishment of localization;ion transport;transport	cell part		VWA	3	3	3	2.5	2.5	2.5	136.71	0	5.1393	127620000	14	2	1	2	1	0	1	1	2	1	1	2	A0A0A0MQY7;Q5VU97	A0A0A0MQY7;Q5VU97	VWFA and cache domain-containing protein 1	CACHD1	1	1223;1274
0.0429897	0.363636	-0.381437	0	-0.980732	-0.812475	0.0927696	0.496502	-0.261263	0.304789	anion channel activity;anion transmembrane transporter activity;binding;channel activity;gated channel activity;ion channel activity;ion transmembrane transporter activity;nucleotide binding;passive transmembrane transporter activity;porin activity;substrate-specific channel activity;substrate-specific transmembrane transporter activity;substrate-specific transporter activity;transmembrane transp…	biological regulation;establishment of localization;ion transport;transport	cell part;extracellular organelle;intracellular membrane-bounded organelle;intracellular non-membrane-bounded organelle;intracellular organelle;macromolecular complex;membrane;mitochondrion;nucleus;organelle;protein complex;vesicle	Calcium signaling pathway;Huntington's disease;Parkinson's disease		8	8	8	39	39	39	30.348	0	38.883	489080000	41	5	4	5	3	0	4	4	2	5	3	6	A0A0A0MR02;P45880;Q5JSD2;Q5JSD1;A2A3S1	A0A0A0MR02;P45880;Q5JSD2;Q5JSD1	Voltage-dependent anion-selective channel protein 2	VDAC2	3	282;294;194;204;109
-0.214919	0.0939646	-0.443328	0.0534792	-1.00029	0.924205	-0.0534792	0.422235	0.280389	-0.161971	catalytic activity;hydrolase activity;hydrolase activity, acting on ester bonds;non-membrane spanning protein tyrosine phosphatase activity;phosphatase activity;phosphoprotein phosphatase activity;phosphoric ester hydrolase activity;protein tyrosine phosphatase activity	cellular metabolic process;cellular process;macromolecule metabolic process;macromolecule modification;metabolic process;phosphorus metabolic process;primary metabolic process;protein dephosphorylation;protein metabolic process;protein modification process	cell part;cytoplasm		CRAL_TRIO_N;PTPc;PTPc_motif;SEC14	5	5	5	12.5	12.5	12.5	66.953	0	27.384	89505000	21	2	3	1	1	2	1	2	3	1	2	3	A0A0A0MR09;P43378;H3BQT6	A0A0A0MR09;P43378	Protein-tyrosine-phosphatase;Tyrosine-protein phosphatase non-receptor type 9	PTPN9		583;593;174
0.239252	0	0.0138683	0.00852585	-0.493818	-3.02276	0.0715733	-0.0061779	-0.0286903	-0.0989113	structural constituent of cytoskeleton;structural molecule activity	anatomical structure formation involved in morphogenesis;anatomical structure morphogenesis;biological regulation;cell death;cell junction organization;cellular component assembly;cellular component morphogenesis;cellular component organization;cellular localization;cellular membrane organization;cellular process;cytoskeleton organization;death;developmental process;localization;membrane organiza…	cell part;cytoplasm;cytoskeleton;intracellular non-membrane-bounded organelle;intracellular organelle;membrane;organelle;plasma membrane	Tight junction	B41	36	32	30	50	46.8	44.9	102.29	0	245.16	3039300000	177	19	19	21	16	0	15	12	13	16	24	22	A0A0A0MRA8;Q9Y2J2;A8K968;A0A0A0MSA4;A0A1B0GTF8;A0A0J9YY18;A0A0J9YW31;J3KT37;J3QS55;A0A0J9YW26;A0A0J9YWN0;A0A0J9YWE1;A0A0J9YWS4;J3QS83;J3KS70;J3QKY2;J3KRD1;J3QKK4;J3QR33;J3QRQ6;J3QLU5	A0A0A0MRA8;Q9Y2J2;A8K968;A0A0A0MSA4;A0A1B0GTF8	Band 4.1-like protein 3;Band 4.1-like protein 3, N-terminally processed	EPB41L3		918;1087;756;1046;571;325;183;147;162;188;189;194;197;110;90;113;116;125;127;79;96
-0.190352	0.520976	0.0338335	-0.0853758	0.0363417	-1.44927	-0.210172	-0.0338335	0.340489	-0.439631	binding;cytoskeletal protein binding;dynactin binding;identical protein binding;lipid binding;phosphatidylinositol binding;phospholipid binding;protein binding;protein dimerization activity;protein homodimerization activity	biological regulation;cellular component organization;cellular membrane organization;cellular process;endocytosis;endosome transport;establishment of localization;membrane invagination;membrane organization;organelle organization;protein transport;regulation of protein modification process;transport;vesicle organization;vesicle-mediated transport	cell part;cytoplasm;cytoplasmic membrane-bounded vesicle;intracellular;intracellular membrane-bounded organelle;intracellular organelle;macromolecular complex;membrane;nucleus;organelle;protein complex;retromer complex;vesicle			5	5	5	14.1	14.1	14.1	47.804	0	24.213	147010000	18	2	4	3	1	0	1	0	1	1	3	2	A0A0A0MRI2;Q9UNH7;G3V5X9	A0A0A0MRI2;Q9UNH7	Sorting nexin-6;Sorting nexin-6, N-terminally processed	SNX6		418;406;239
-0.326111	-0.411757	-0.63446	-0.685766	-0.470303	2.33885	0.414013	0.610735	0.780527	0.613844	carboxyl-O-methyltransferase activity;catalytic activity;methyltransferase activity;O-methyltransferase activity;protein carboxyl O-methyltransferase activity;protein methyltransferase activity;protein-L-isoaspartate (D-aspartate) O-methyltransferase activity;S-adenosylmethionine-dependent methyltransferase activity;transferase activity;transferase activity, transferring one-carbon groups	amine metabolic process;cellular amino acid metabolic process;cellular ketone metabolic process;cellular metabolic process;cellular nitrogen compound metabolic process;cellular process;cofactor metabolic process;heterocycle metabolic process;macromolecule metabolic process;macromolecule modification;metabolic process;nitrogen compound metabolic process;nucleobase-containing compound metabolic pro…	cell part;cytoplasm;endoplasmic reticulum;extracellular organelle;intracellular membrane-bounded organelle;intracellular organelle;organelle;vesicle			11	11	11	43.9	43.9	43.9	30.315	0	138.83	3316400000	84	7	4	7	5	8	10	7	9	9	9	9	A0A0A0MRJ6;H7BY58;P22061;F6S8N6;F8WDT3;F8WAV5;F8WAX2;H7C4X2;C9J0F2	A0A0A0MRJ6;H7BY58;P22061;F6S8N6	Protein-L-isoaspartate O-methyltransferase;Protein-L-isoaspartate(D-aspartate) O-methyltransferase	PCMT1		285;286;227;250;120;124;130;67;96
-0.192574	-0.42729	0.0102863	0	0.3885	0.929314	0.0451813	0.0330982	-0.434757	-0.566595	actin binding;actin filament binding;adenyl nucleotide binding;adenyl ribonucleotide binding;ADP binding;ATP binding;binding;calmodulin binding;catalytic activity;cytoskeletal protein binding;hydrolase activity;hydrolase activity, acting on acid anhydrides;hydrolase activity, acting on acid anhydrides, in phosphorus-containing anhydrides;microfilament motor activity;minus-end directed microfilame…	anatomical structure development;anatomical structure morphogenesis;behavior;biological regulation;cell communication;cell differentiation;cell-cell signaling;cellular component assembly;cellular component movement;cellular component organization;cellular membrane organization;cellular process;developmental process;endocytosis;establishment of localization;membrane invagination;membrane organizat…	apical part of cell;cell body;cell cortex;cell part;cell projection;cytoplasm;cytoplasmic membrane-bounded vesicle;cytosol;DNA-directed RNA polymerase II, holoenzyme;extracellular organelle;Golgi apparatus;intracellular membrane-bounded organelle;intracellular organelle;macromolecular complex;membrane;microvillus;neuron projection;neuronal cell body;nucleoplasm;nucleus;organelle;plasma membrane;p…		IQ;MYSc	18	18	18	17.2	17.2	17.2	145.01	0	101.09	532250000	72	6	10	14	12	4	6	2	3	2	6	7	A0A0A0MRM8;E7EW20;Q9UM54;A0A0D9SGC1;Q5JVM0	A0A0A0MRM8;E7EW20;Q9UM54;A0A0D9SGC1	Unconventional myosin-VI	MYO6		1253;1295;1294;1294;174
0.18964	0.26119	0	-0.0167465	0.164288	-1.06413	0.0305195	-0.0857792	-0.0999107	0.37785	adenyl nucleotide binding;adenyl ribonucleotide binding;ATP binding;binding;GTP binding;guanyl nucleotide binding;guanyl ribonucleotide binding;nucleotide binding;purine nucleotide binding;purine ribonucleoside triphosphate binding;purine ribonucleotide binding;ribonucleotide binding	cell cycle;cellular component organization;cellular metabolic process;cellular nitrogen compound metabolic process;cellular process;macromolecule metabolic process;metabolic process;mitosis;nitrogen compound metabolic process;nuclear division;nucleobase-containing compound metabolic process;nucleus organization;organelle fission;organelle organization;primary metabolic process;RNA metabolic proce…	cell part;cytoplasm;intracellular non-membrane-bounded organelle;intracellular organelle;nucleolus;nucleoplasm;organelle		LisH	21	21	17	27.4	27.4	23.7	74.543	0	164.33	5475700000	117	13	10	13	10	4	8	10	8	11	14	16	A0A0A0MRM9;Q14978;S4R349;S4R402;S4R3C2	A0A0A0MRM9;Q14978	Nucleolar and coiled-body phosphoprotein 1	NOLC1		708;699;258;46;281
0.440597	0.601882	0.17933	0.0662527	-0.438518	-2.82997	-0.0993834	-0.436225	-0.212886	-0.0662527	catalytic activity;guanylate kinase activity;kinase activity;nucleobase-containing compound kinase activity;nucleotide kinase activity;phosphotransferase activity, phosphate group as acceptor;transferase activity;transferase activity, transferring phosphorus-containing groups	biological regulation;cellular metabolic process;cellular nitrogen compound metabolic process;cellular process;metabolic process;nitrogen compound metabolic process;nucleobase-containing compound metabolic process;nucleobase-containing small molecule metabolic process;nucleotide metabolic process;phosphorus metabolic process;primary metabolic process;response to stimulus;signal transduction;small…	cell part;membrane		GuKc;L27;PDZ;SH3	15	12	12	43.2	40.8	40.8	63.319	0	61.418	657340000	71	6	7	10	7	0	6	5	5	5	9	11	A0A0A0MRU0;B4DZ84;D3DX48;A0A0D9SFF8;D3DX49;A0A0C4DH75;Q14168;A0A087WVY2;E5RI47;E5RJK0;E5RI32;E5RIU3;E5RK50;E5RK44	A0A0A0MRU0;B4DZ84;D3DX48;A0A0D9SFF8;D3DX49;A0A0C4DH75;Q14168	MAGUK p55 subfamily member 2	MPP2		569;541;552;573;576;597;576;186;189;140;148;151;126;143
-0.071291	-0.0425014	0.39489	0.831383	0.383224	-2.19431	-0.644215	-0.203947	-0.568046	-0.360323	AU-rich element binding;binding;mRNA 3'-UTR binding;mRNA binding;nucleic acid binding;nucleotide binding;RNA binding	biological regulation;cellular metabolic process;cellular nitrogen compound metabolic process;cellular process;macromolecule metabolic process;metabolic process;mRNA metabolic process;mRNA processing;nitrogen compound metabolic process;nucleobase-containing compound metabolic process;primary metabolic process;RNA metabolic process;RNA processing			RRM	5	3	3	13.6	9	9	42.632	0	8.6132	84994000	7	0	1	2	1	1	1	0	0	0	1	0	A0A0A0MRX1;Q12926;B1AM48;B1APY9;B1APY8;A0A0R4J2E6;P26378;C9JB16	A0A0A0MRX1;Q12926;B1AM48;B1APY9;B1APY8;A0A0R4J2E6;P26378	ELAV-like protein;ELAV-like protein 2;ELAV-like protein 4	ELAVL2;ELAVL4		389;359;189;371;385;402;380;90
-0.133883	0.027298	-0.15748	-0.202473	0.247181	-2.26839	-0.279041	0.00924301	0.24684	-0.00924301	binding;cell adhesion molecule binding;protein binding;receptor activity	biological adhesion;biological regulation;cell adhesion;cell junction organization;cellular component assembly;cellular component organization;cellular process;viral reproduction	cell part;cell surface;cytoplasm;extracellular organelle;extracellular space;membrane;organelle;plasma membrane;vesicle	Cell adhesion molecules (CAMs)	IG;IGv	4	4	4	10.2	10.2	10.2	42.882	0	9.8725	705120000	12	3	2	2	1	0	0	0	0	0	2	2	A0A0A0MSA9;A0A0C4DG49;P15151	A0A0A0MSA9;A0A0C4DG49;P15151	Poliovirus receptor	PVR	1	392;417;417
0.534013	0.249518	-0.293504	-0.249087	-0.844792	-1.99705	0.886683	0.204482	-0.102889	-0.0954752	3-hydroxyacyl-CoA dehydrogenase activity;binding;catalytic activity;coenzyme binding;cofactor binding;NAD binding;NAD+ binding;nucleotide binding;oxidoreductase activity;oxidoreductase activity, acting on CH-OH group of donors;oxidoreductase activity, acting on the CH-OH group of donors, NAD or NADP as acceptor	biological regulation;catabolic process;cellular ketone metabolic process;cellular lipid metabolic process;cellular metabolic process;cellular process;lipid metabolic process;metabolic process;organic acid metabolic process;primary metabolic process;regulation of transport;response to chemical stimulus;response to drug;response to endogenous stimulus;response to stimulus;small molecule metabolic …	cell part;cytoplasm;intracellular membrane-bounded organelle;intracellular organelle;membrane;mitochondrion;nucleoplasm;organelle	Butanoate metabolism;Caprolactam degradation;Fatty acid elongation in mitochondria;Fatty acid metabolism;Geraniol degradation;Lysine degradation;Tryptophan metabolism;Valine, leucine and isoleucine degradation		6	6	6	40.8	40.8	40.8	26.479	0	30.676	358270000	35	3	3	3	2	0	3	5	5	3	3	5	A0A1W2PQV5;A0A1W2PNM1;A0A0A0MSE2;A0A0D9SFP2;E9PF18;Q16836;A0A1W2PQC2;A0A1W2PRT2;A0A1W2PQ78;A0A1W2PQ55;A0A1W2PP40	A0A1W2PQV5;A0A1W2PNM1;A0A0A0MSE2;A0A0D9SFP2;E9PF18;Q16836;A0A1W2PQC2;A0A1W2PRT2;A0A1W2PQ78	Hydroxyacyl-coenzyme A dehydrogenase, mitochondrial	HADH		245;267;317;318;390;314;165;183;176;100;145
-0.189758	-0.433746	-0.165192	0.0564384	0.134342	0.348722	-0.178368	0	0.00839233	-0.399384	binding;enzyme binding;GTPase binding;protein binding;Ral GTPase binding;Ras GTPase binding;small GTPase binding	cellular component organization;cellular metabolic process;cellular process;establishment of localization;exocytosis;Golgi vesicle transport;macromolecule metabolic process;membrane docking;membrane organization;metabolic process;organelle organization;primary metabolic process;protein metabolic process;protein transport;secretion;transport;vesicle-mediated transport	cell part;cytoplasm;cytosol			10	10	10	24.4	24.4	24.4	74.34	0	35.425	111890000	29	6	4	5	5	0	2	0	1	1	1	4	F8W9B8;A0A0A0MSI8;O00471;G3V377	F8W9B8;A0A0A0MSI8;O00471	Exocyst complex component 5	EXOC5		643;711;708;44
0.0900249	-0.250118	0.266014	0.746843	0.17116	-2.0141	-0.560025	-0.638913	-0.263184	-0.0900249	active transmembrane transporter activity;anion transmembrane transporter activity;anion:anion antiporter activity;anion:cation symporter activity;antiporter activity;bicarbonate transmembrane transporter activity;cation transmembrane transporter activity;inorganic anion exchanger activity;inorganic anion transmembrane transporter activity;inorganic cation transmembrane transporter activity;ion t…	anatomical structure development;anatomical structure morphogenesis;biological regulation;cell death;cell development;cellular homeostasis;cellular ion homeostasis;cellular process;death;developmental process;establishment of localization;homeostatic process;ion transport;transmembrane transport;transport	cell part;cell projection;membrane;microvillus;plasma membrane			5	5	5	5.3	5.3	5.3	134.57	0	9.4566	78381000	7	0	1	3	1	0	0	0	0	1	0	1	A0A0A0MST8;E9PFN4;C9JRP1;Q9Y6M7;H7C3C4	A0A0A0MST8;E9PFN4;C9JRP1;Q9Y6M7	Anion exchange protein;Sodium bicarbonate cotransporter 3	SLC4A7	1	1201;1210;1051;1214;801
-0.0170298	0.69719	0.358375	-0.150451	-0.088748	-2.35334	-0.235518	0.590285	-0.134568	0.0170298	binding;lipid binding;lipid transporter activity;phosphatidylcholine transmembrane transporter activity;phosphatidylinositol transporter activity;phospholipid transporter activity;substrate-specific transporter activity;transporter activity	biosynthetic process;cellular lipid metabolic process;cellular metabolic process;cellular process;developmental process;embryo development;establishment of localization;lipid metabolic process;lipid transport;locomotion;metabolic process;multicellular organismal process;neurological system process;primary metabolic process;response to chemical stimulus;response to external stimulus;response to st…	cell part;cytoplasm;extracellular organelle;intracellular;membrane;organelle;vesicle			4	4	4	24	24	24	31.581	0	13.439	190230000	20	3	2	1	1	0	1	3	1	3	2	3	A0A0A0MSW4;P48739;B3KYB6;B3KYB7;I3L3W1;I3L2X8;I3L471;I3L4C0;I3L4U7;I3L459;I3L4H1;F5GWE5;Q00169	A0A0A0MSW4;P48739;B3KYB6;B3KYB7	Phosphatidylinositol transfer protein beta isoform	PITPNB		271;271;120;167;44;83;98;115;121;142;209;270;270
-0.203277	-0.54983	-0.591057	-0.463219	-0.847392	-2.65717	0.314288	-0.772277	-0.74297	0.0821733	binding;catalytic activity;coenzyme binding;cofactor binding;ferredoxin-NADP+ reductase activity;NADP binding;NADPH binding;NADPH-adrenodoxin reductase activity;nucleotide binding;oxidoreductase activity;oxidoreductase activity, acting on iron-sulfur proteins as donors;oxidoreductase activity, acting on iron-sulfur proteins as donors, NAD or NADP as acceptor	alcohol metabolic process;biological regulation;biosynthetic process;cellular ketone metabolic process;cellular metabolic process;cellular nitrogen compound metabolic process;cellular process;cofactor metabolic process;generation of precursor metabolites and energy;heterocycle metabolic process;hormone metabolic process;lipid metabolic process;metabolic process;nitrogen compound metabolic process…	cell part;intracellular membrane-bounded organelle;intracellular organelle;membrane;mitochondrion;organelle			3	3	3	11.2	11.2	11.2	48.027	0	6.0828	45222000	3	0	0	0	0	0	1	0	0	0	0	2	A0A0A0MTN9;J3QQX3;A0A0A0MTR6;A0A0C4DFN8;A0A0A0MSZ4;A0A0A0MT64;P22570;J3QKZ8;A0A0C4DGN7	A0A0A0MTN9;J3QQX3;A0A0A0MTR6;A0A0C4DFN8;A0A0A0MSZ4;A0A0A0MT64;P22570;J3QKZ8;A0A0C4DGN7	NADPH:adrenodoxin oxidoreductase, mitochondrial	FDXR		439;463;483;491;522;534;491;164;497
-0.225188	0.17736	0.0650892	0.193372	-0.0650892	-1.98242	-0.798383	-0.0875216	-0.82111	-0.161792	active transmembrane transporter activity;adenyl nucleotide binding;adenyl ribonucleotide binding;ATP binding;ATPase activity;ATPase activity, coupled;ATPase activity, coupled to movement of substances;ATPase activity, coupled to transmembrane movement of ions;ATPase activity, coupled to transmembrane movement of ions, phosphorylative mechanism;ATPase activity, coupled to transmembrane movement o…	behavior;biological regulation;cellular homeostasis;cellular ion homeostasis;cellular process;establishment of localization;homeostatic process;hydrogen transport;ion transport;multicellular organismal process;neurological system process;regulation of transport;response to abiotic stimulus;response to chemical stimulus;response to drug;response to endogenous stimulus;response to stimulus;signal t…	cell part;cell projection;endoplasmic reticulum;extracellular space;Golgi apparatus;intracellular membrane-bounded organelle;intracellular organelle;macromolecular complex;membrane;neuron projection;nucleus;organelle;plasma membrane;protein complex;synapse;vesicle	Aldosterone-regulated sodium reabsorption;Bile secretion;Carbohydrate digestion and absorption;Cardiac muscle contraction;Collecting duct acid secretion;Endocrine and other factor-regulated calcium reabsorption;Gastric acid secretion;Mineral absorption;Oxidative phosphorylation;Pancreatic secretion;Protein digestion and absorption;Proximal tubule bicarbonate reclamation;Salivary secretion	Cation_ATPase_N	21	4	3	25.8	7.1	5.4	108.28	0	10.841	68626000	10	1	1	1	1	0	0	0	0	1	2	3	M0R116;A0A2R8YEY8;A0A0A0MT26;P13637;M0QXF2;P20648	M0R116;A0A2R8YEY8;A0A0A0MT26;P13637	Sodium/potassium-transporting ATPase subunit alpha-3	ATP1A3	1	983;1010;1226;1013;251;1035
-0.0570087	-0.11754	0.473501	0	0.147289	0.809961	0.326942	-0.227217	-0.306623	-0.0548134	binding;enzyme binding;nucleic acid binding;nucleotide binding;protein binding;RNA binding;RNA polymerase binding;RNA polymerase core enzyme binding	cellular metabolic process;cellular nitrogen compound metabolic process;cellular process;macromolecule metabolic process;metabolic process;mRNA metabolic process;mRNA processing;nitrogen compound metabolic process;nucleobase-containing compound metabolic process;primary metabolic process;RNA metabolic process;RNA processing;RNA splicing	cell part;macromolecular complex;nucleoplasm;ribonucleoprotein complex;spliceosomal complex		RPR;RRM	5	5	3	5.9	5.9	4.4	148.86	0	17.377	153390000	27	3	3	3	5	1	3	1	2	2	2	2	A0A0A0MT33;Q9UPN6	A0A0A0MT33;Q9UPN6	Protein SCAF8	SCAF8		1349;1271
0.506954	0.68474	0	-0.591299	-1.03577	-0.333626	0.976738	1.38811	0.689816	-0.0517578	acyl-CoA dehydrogenase activity;binding;catalytic activity;coenzyme binding;cofactor binding;flavin adenine dinucleotide binding;isovaleryl-CoA dehydrogenase activity;oxidoreductase activity;oxidoreductase activity, acting on the CH-CH group of donors	amine metabolic process;catabolic process;cellular amino acid metabolic process;cellular ketone metabolic process;cellular metabolic process;cellular nitrogen compound metabolic process;cellular process;metabolic process;nitrogen compound metabolic process;organic acid metabolic process;primary metabolic process;small molecule metabolic process	cell part;intracellular membrane-bounded organelle;intracellular organelle;membrane;mitochondrion;nucleoplasm;organelle	Valine, leucine and isoleucine degradation		9	9	9	29.6	29.6	29.6	46.65	0	54.943	350020000	32	4	5	3	0	0	4	3	2	4	0	7	A0A0A0MT83;P26440;H7C4G6;H0YKV0;H0YN10;H0YLC3;A0A087WVD3	A0A0A0MT83;P26440;H7C4G6	Isovaleryl-CoA dehydrogenase, mitochondrial	IVD		426;423;307;145;212;243;214
-0.113855	-0.560116	0.275372	-0.0741825	0	-1.8518	0.32984	-0.721844	-0.920078	0.18504	acid-amino acid ligase activity;ATPase activity;binding;catalytic activity;cation binding;hydrolase activity;hydrolase activity, acting on acid anhydrides;hydrolase activity, acting on acid anhydrides, in phosphorus-containing anhydrides;ion binding;ligase activity;ligase activity, forming carbon-nitrogen bonds;metal ion binding;nucleoside-triphosphatase activity;pyrophosphatase activity;small co…	cellular metabolic process;cellular process;macromolecule metabolic process;macromolecule modification;metabolic process;primary metabolic process;protein metabolic process;protein modification by small protein conjugation or removal;protein modification process	cell part;cytoplasm;intracellular non-membrane-bounded organelle;intracellular organelle;membrane;nucleolus;organelle		AAA;RING	5	5	5	1.4	1.4	1.4	591.4	0	9.7213	38218000	13	0	1	3	2	1	2	0	0	1	2	1	A0A0A0MTR7;A0A0A0MTC1;Q63HN8	A0A0A0MTR7;A0A0A0MTC1;Q63HN8	E3 ubiquitin-protein ligase RNF213	RNF213		5207;5256;5207
-0.330385	-0.222342	-0.348194	-0.342758	-0.960996	0.921049	0.186571	0.153336	0.248587	0	adenyl nucleotide binding;adenyl ribonucleotide binding;aminoacyl-tRNA editing activity;aminoacyl-tRNA ligase activity;ATP binding;binding;carboxylic ester hydrolase activity;catalytic activity;hydrolase activity;hydrolase activity, acting on ester bonds;ligase activity;ligase activity, forming aminoacyl-tRNA and related compounds;ligase activity, forming carbon-oxygen bonds;nucleotide binding;pu…	amine metabolic process;cellular amino acid metabolic process;cellular ketone metabolic process;cellular metabolic process;cellular nitrogen compound metabolic process;cellular process;macromolecule metabolic process;metabolic process;nitrogen compound metabolic process;nucleobase-containing compound metabolic process;organic acid metabolic process;primary metabolic process;RNA metabolic process;…	cell part;intracellular membrane-bounded organelle;intracellular organelle;mitochondrion;organelle	Aminoacyl-tRNA biosynthesis;Valine, leucine and isoleucine biosynthesis		5	5	5	6	6	6	118.3	0	15.757	89539000	17	1	2	3	1	0	1	1	1	1	1	5	A0A140TA45;A0A140TA40;A0A0A0MTG1;A0A140T8Y0;A0A0G2JIA5;A0A140TA36;A0A140TA35;Q5ST30;B7ZL25;B4E0K6;A0A0G2JL52	A0A140TA45;A0A140TA40;A0A0A0MTG1;A0A140T8Y0;A0A0G2JIA5;A0A140TA36;A0A140TA35;Q5ST30;B7ZL25;B4E0K6;A0A0G2JL52	Valine--tRNA ligase, mitochondrial	VARS2		1061;1061;1061;1063;1063;1093;1093;1063;1061;1063;1093
-0.762059	-0.442727	0.42186	0	-0.10458	-2.21888	-0.668963	-0.643269	-0.768814	-0.738773	adenyl nucleotide binding;adenyl ribonucleotide binding;ATP binding;binding;catalytic activity;DNA binding;helicase activity;hydrolase activity;hydrolase activity, acting on acid anhydrides;hydrolase activity, acting on acid anhydrides, in phosphorus-containing anhydrides;nucleic acid binding;nucleic acid binding transcription factor activity;nucleoside-triphosphatase activity;nucleotide binding;…	biological regulation	cell part;intracellular membrane-bounded organelle;intracellular organelle;nucleus;organelle		DEXDc;HELICc	3	3	3	1.8	1.8	1.8	206.93	0	3.8561	46469000	7	1	2	1	1	0	1	0	0	0	0	1	A0A0A0MTH9;O14981	A0A0A0MTH9;O14981	TATA-binding protein-associated factor 172	BTAF1		1849;1849
-0.101805	0.00252724	-0.554043	-0.546528	-1.07212	-2.58852	0.457422	-0.861323	-0.705338	0.626806	acid-amino acid ligase activity;binding;catalytic activity;identical protein binding;ligase activity;ligase activity, forming carbon-nitrogen bonds;protein binding;small conjugating protein ligase activity;ubiquitin-protein ligase activity	biological regulation;catabolic process;cell communication;cell cycle;cell proliferation;cellular metabolic process;cellular process;macromolecule metabolic process;macromolecule modification;metabolic process;mitotic cell cycle;primary metabolic process;protein metabolic process;protein modification by small protein conjugation or removal;protein modification process;proteolysis;proteolysis invo…	cell part;cytoplasm;cytosol;intracellular membrane-bounded organelle;intracellular non-membrane-bounded organelle;intracellular organelle;macromolecular complex;nucleolus;nucleoplasm;nucleus;organelle;protein complex;ubiquitin ligase complex	Cell cycle;Pathways in cancer;Small cell lung cancer;Ubiquitin mediated proteolysis	FBOX;LRR_CC	3	3	3	8.7	8.7	8.7	48.885	0	7.212	79596000	8	1	0	1	0	0	1	1	1	2	0	1	A0A0A0MTL5;Q13309;D6RAG5;D6R9R7	A0A0A0MTL5;Q13309	S-phase kinase-associated protein 2	SKP2		435;424;217;255
-0.273958	0.117056	0.0667229	0.285759	0.574398	-2.28964	-0.411194	-0.398384	-0.346682	-0.494734	binding;enzyme binding;protein binding;ubiquitin protein ligase binding	biological regulation;catabolic process;cellular metabolic process;cellular process;macromolecule metabolic process;macromolecule modification;metabolic process;primary metabolic process;protein metabolic process;protein modification by small protein conjugation or removal;protein modification process;proteolysis;proteolysis involved in cellular protein catabolic process;regulation of cell cycle;…	cell part;cytosol;intracellular non-membrane-bounded organelle;intracellular organelle;macromolecular complex;nucleolus;nucleoplasm;organelle;protein complex;ubiquitin ligase complex	Pathways in cancer;Renal cell carcinoma;Ubiquitin mediated proteolysis	CULLIN;Cullin_Nedd8	10	10	10	16.2	16.2	16.2	88.505	0	25.888	186830000	23	3	3	6	5	0	0	0	0	0	2	4	A0A0A0MTN0;Q13617;Q5T2B5;Q5T2B7	A0A0A0MTN0;Q13617;Q5T2B5	Cullin-2	CUL2		758;745;706;90
0.359922	0.484928	0	-0.443439	-1.07846	-2.01937	-0.780825	-0.854745	-0.0209637	-0.618731	amine binding;amino acid binding;binding;carboxylic acid binding;catalytic activity;enzyme binding;glutathione binding;glutathione transferase activity;identical protein binding;modified amino acid binding;peptide binding;protein binding;protein dimerization activity;protein homodimerization activity;receptor binding;transferase activity;transferase activity, transferring alkyl or aryl (other tha…	amine metabolic process;anatomical structure development;biological regulation;catabolic process;cell development;cellular amino acid metabolic process;cellular aromatic compound metabolic process;cellular ketone metabolic process;cellular metabolic process;cellular nitrogen compound metabolic process;cellular process;developmental process;metabolic process;multicellular organismal process;nitrog…	cell part;cytoplasm;cytosol;endoplasmic reticulum;extracellular organelle;intracellular membrane-bounded organelle;intracellular organelle;nucleus;organelle;vesicle	Drug metabolism - cytochrome P450;Glutathione metabolism;Metabolism of xenobiotics by cytochrome P450		2	2	2	11.8	11.8	11.8	24.914	0	4.3679	33955000	10	2	2	1	1	0	0	0	0	1	1	2	A0A0A0MTN3;P21266;E9PLF1;E9PHN7;E9PHN6;Q5T8Q9;Q5T8R1;F6XZQ7;P46439;P28161	A0A0A0MTN3;P21266;E9PLF1;E9PHN7;E9PHN6;Q5T8Q9;Q5T8R1;F6XZQ7;P46439;P28161	Glutathione S-transferase Mu 3;Glutathione S-transferase Mu 5;Glutathione S-transferase Mu 2	GSTM3;GSTM2;GSTM5		212;225;147;181;193;202;218;220;218;218
0.167734	0.00553894	0	-0.389456	0.0425911	-2.15317	-0.664899	-0.661276	-0.811969	-0.505142	binding;carboxylic acid binding;catalytic activity;cation binding;ion binding;iron ion binding;L-ascorbic acid binding;metal ion binding;oxidoreductase activity;oxidoreductase activity, acting on paired donors, with incorporation or reduction of molecular oxygen;oxidoreductase activity, acting on paired donors, with incorporation or reduction of molecular oxygen, 2-oxoglutarate as one donor, and …	biological regulation;cell proliferation;cellular component assembly;cellular component organization;cellular macromolecular complex assembly;cellular metabolic process;cellular process;macromolecular complex assembly;macromolecule metabolic process;macromolecule modification;metabolic process;peptidyl-amino acid modification;primary metabolic process;protein metabolic process;protein modificatio…	cell part;cytoplasm;intracellular membrane-bounded organelle;intracellular non-membrane-bounded organelle;intracellular organelle;macromolecular complex;nucleus;organelle;ribonucleoprotein complex		P4Hc	2	2	2	4.4	4.4	4.4	58.378	0	4.8364	28047000	11	2	3	2	2	0	0	0	0	0	0	2	A0A0A0MTR2;Q8N543;H3BR79;H3BUA6	A0A0A0MTR2;Q8N543;H3BR79;H3BUA6	Prolyl 3-hydroxylase OGFOD1	OGFOD1	3	499;542;164;175
-0.153539	-0.291688	-0.10834	0.128253	-0.0593042	-3.13066	0.154731	0.0593042	0.439155	0.215245			cell part;cytoplasm			3	3	3	8.9	8.9	8.9	46.22	0	24.297	123720000	13	2	1	4	1	0	1	1	0	0	2	1	A0A0A0MTU3;Q4ZIN3;U3KPY4	A0A0A0MTU3;Q4ZIN3	Membralin	TMEM259	2	406;620;421
0.418288	-0.00778103	0.221744	0.488397	0.139974	-2.26019	0.00778103	-0.057538	-0.142411	-0.267959		establishment of localization;protein transport;transport	cell part;endoplasmic reticulum;extracellular organelle;Golgi apparatus;intracellular membrane-bounded organelle;intracellular organelle;macromolecular complex;membrane;organelle;protein complex;vesicle			3	3	3	23.4	23.4	23.4	21.233	0	10.457	156230000	11	1	2	3	1	0	1	0	0	0	1	2	A0A0A6YYA0;Q9Y3B3;G3V2Y2	A0A0A6YYA0;Q9Y3B3	Transmembrane emp24 domain-containing protein 7	TMED7-TICAM2;TMED7	1	188;224;81
-0.628281	-0.191463	0	0.170397	0.334438	-0.0172043	0.170298	-0.0204887	-0.0818691	0.511116	binding;enzyme binding;mRNA binding;nucleic acid binding;protein binding;RNA binding	cellular component assembly;cellular component organization;cellular macromolecular complex assembly;cellular process;macromolecular complex assembly;ribonucleoprotein complex assembly	cell part;macromolecular complex;ribonucleoprotein complex;small nuclear ribonucleoprotein complex			11	11	8	26.2	26.2	18.8	54.223	0	43.189	711580000	38	3	4	8	5	2	3	2	3	3	2	3	A0A0A6YYJ8;Q9Y383	A0A0A6YYJ8;Q9Y383	Putative RNA-binding protein Luc7-like 2	LUC7L2		458;392
-0.597546	-0.593106	-0.0762577	0.00648499	-0.836965	-1.70641	-0.665043	0.073801	-0.319162	-0.691289	actin binding;binding;cytoskeletal protein binding;protein binding	biological regulation;cellular component assembly;cellular component organization;cellular macromolecular complex assembly;cellular metabolic process;cellular process;cytoskeleton organization;endosome transport;establishment of localization;Golgi vesicle transport;macromolecular complex assembly;macromolecule metabolic process;metabolic process;organelle organization;primary metabolic process;pr…	cell part;cytoplasmic membrane-bounded vesicle;cytosol;Golgi apparatus;intracellular membrane-bounded organelle;intracellular organelle;macromolecular complex;membrane;mitochondrial inner membrane presequence translocase complex;organelle;protein complex;vesicle		WD40	4	4	4	7.8	7.8	7.8	114.16	0	12.806	43244000	9	0	2	1	1	0	1	1	0	0	2	1	A0A0A6YYL4;P57737;I3L1U7;I3L0X9;I3L3T0;I3L212;E7EP81;I3L167;Q9Y3D7	A0A0A6YYL4;P57737	Coronin;Coronin-7	CORO7-PAM16;CORO7		1048;925;129;137;145;205;367;535;125
-0.450037	0.168295	-0.116003	0	-0.0960445	-0.564856	0.32416	0.71875	0.674004	0.599236	binding;cation binding;ion binding;metal ion binding;nucleic acid binding;nucleotide binding;transition metal ion binding;zinc ion binding	biological regulation;biosynthetic process;cellular metabolic process;cellular nitrogen compound metabolic process;cellular process;establishment of localization;macromolecule metabolic process;metabolic process;mRNA metabolic process;mRNA processing;nitrogen compound metabolic process;nuclear transport;nucleobase-containing compound metabolic process;nucleobase-containing compound transport;nucl…	cell part;cytoplasm;extracellular organelle;intracellular membrane-bounded organelle;intracellular organelle;nucleoplasm;nucleus;organelle;vesicle	Spliceosome	RRM;ZnF_C2HC	7	6	6	45.3	45.3	45.3	15.763	0	30.747	1873200000	36	3	5	3	3	2	3	3	4	5	3	2	A0A0B4J1Z1;C9JAB2;Q16629;F8WEA1	A0A0B4J1Z1;C9JAB2;Q16629	Serine/arginine-rich splicing factor 7	SRSF7		137;235;238;51
-0.678714	0.00262928	-0.0650682	-0.309972	0.123277	0.679738	0.392941	0.330625	-0.216027	-0.560284	binding;nucleic acid binding;RNA binding;snoRNA binding	cellular component assembly;cellular component organization;cellular macromolecular complex assembly;cellular metabolic process;cellular nitrogen compound metabolic process;cellular process;macromolecular complex assembly;macromolecule metabolic process;metabolic process;nitrogen compound metabolic process;nucleobase-containing compound metabolic process;primary metabolic process;ribonucleoprotei…	cell part;cytoplasm;intracellular non-membrane-bounded organelle;intracellular organelle;macromolecular complex;nucleolus;organelle;preribosome;protein complex;ribonucleoprotein complex	Ribosome biogenesis in eukaryotes	WD40	3	3	2	3.9	3.9	2.5	102.45	0	6.5354	87212000	13	1	2	3	2	0	1	0	0	1	1	2	A0A0B4J2E5;Q15269	A0A0B4J2E5;Q15269	Periodic tryptophan protein 2 homolog	PWP2		919;919
-0.0488644	0.359667	0.0502357	0.24819	0.125772	-2.4815	-0.509264	-0.474125	-0.392603	-0.173817		cellular metabolic process;cellular process;macromolecule metabolic process;macromolecule modification;metabolic process;primary metabolic process;protein metabolic process;protein modification by small protein conjugation or removal;protein modification process	cell part;cytoplasm;intracellular membrane-bounded organelle;intracellular organelle;membrane;nucleus;organelle		LRR_RI	4	4	4	10.9	10.9	10.9	86.238	0	14.126	94184000	15	2	2	2	1	0	1	0	1	1	2	3	A0A0B4J2G4;Q15345;A0A087WTU1;A0A087X0S7;A0A0C4DH00;A0A087WTI9	A0A0B4J2G4;Q15345;A0A087WTU1;A0A087X0S7;A0A0C4DH00	Leucine-rich repeat-containing protein 41	LRRC41		790;812;620;521;617;227
0.166098	0.0335102	-0.305582	-0.268118	-1.01384	-2.99575	0.0654984	0.409266	0.494938	0	binding;catalytic activity;cation binding;demethylase activity;heme binding;ion binding;iron ion binding;metal ion binding;monooxygenase activity;oxidoreductase activity;oxidoreductase activity, acting on paired donors, with incorporation or reduction of molecular oxygen;oxidoreductase activity, acting on paired donors, with incorporation or reduction of molecular oxygen, NADH or NADPH as one don…	alcohol metabolic process;biosynthetic process;cellular metabolic process;cellular process;lipid metabolic process;metabolic process;one-carbon metabolic process;primary metabolic process;small molecule metabolic process;xenobiotic metabolic process	cell part;endoplasmic reticulum;intracellular membrane-bounded organelle;intracellular organelle;membrane;organelle	Steroid biosynthesis		23	23	23	58.7	58.7	58.7	57.278	0	133.71	1750300000	104	8	9	16	9	0	10	7	6	9	15	15	A0A0C4DFL7;Q16850;H7C0D0;C9IYR8	A0A0C4DFL7;Q16850	Lanosterol 14-alpha demethylase	CYP51A1		509;503;222;30
-0.228207	0.103111	0.246145	0.0649376	-0.0649376	-2.2844	-0.0867443	0.119049	0.242439	-0.161047			cell part			3	3	3	7.2	7.2	7.2	72.54	0	10.151	238450000	28	2	3	3	1	1	4	3	4	3	2	2	A0A0C4DFM1;Q92544;F8WCN2;F2Z2L1	A0A0C4DFM1;Q92544	Transmembrane 9 superfamily member 4	TM9SF4		625;642;68;85
0.0768394	-0.256742	0.00838852	0.0671349	0.169762	-2.46336	-0.564888	-0.00838852	-0.778435	-0.562695	acetylcholine receptor binding;adrenergic receptor binding;beta-1 adrenergic receptor binding;binding;catalytic activity;channel regulator activity;cytoskeletal protein binding;D1 dopamine receptor binding;dopamine receptor binding;enzyme binding;glutamate receptor binding;G-protein-coupled receptor binding;guanylate kinase activity;hydrolase activity;hydrolase activity, acting on ester bonds;ion…	anatomical structure development;anatomical structure morphogenesis;behavior;behavioral interaction between organisms;biological adhesion;biological regulation;cell activation;cell adhesion;cell communication;cell junction organization;cell proliferation;cell recognition;cell-cell signaling;cellular component assembly;cellular component morphogenesis;cellular component organization;cellular homeo…	cell part;cell projection;cytoplasm;cytoplasmic membrane-bounded vesicle;cytoskeleton;cytosol;endoplasmic reticulum;extracellular organelle;Golgi apparatus;intracellular membrane-bounded organelle;intracellular non-membrane-bounded organelle;intracellular organelle;macromolecular complex;membrane;neuron projection;nucleus;organelle;plasma membrane;protein complex;receptor complex;synapse;vesicle	Huntington's disease;T cell receptor signaling pathway	GuKc;L27;PDZ;SH3	13	13	13	26.7	26.7	26.7	99.813	0	52.582	639370000	49	4	6	7	8	0	4	0	2	1	9	8	A0A0C4DFT3;Q12959;E7EQD7;B4E2H8;H7C166;C9IYP1;C9JUA9;C9JN61;C9JCP6;A8MUT6;C9J110;F2Z2L0;A8MUT9;C9JWP9;C9JYG3;O14909;Q6ZSU2;B7Z264;E9PIW2;B7Z2T4;E9PN83;P78352;Q15700	A0A0C4DFT3;Q12959;E7EQD7;B4E2H8	Disks large homolog 1	DLG1		892;904;658;370;286;122;123;154;179;208;35;106;232;234;281;296;552;791;811;852;866;724;870
-0.129965	0.530155	0.610367	0.924601	1.47815	-1.37328	-0.35244	-0.163357	0	-0.107292	binding;chromatin binding;DNA binding;enzyme inhibitor activity;enzyme regulator activity;histone binding;nucleic acid binding;phosphatase inhibitor activity;phosphatase regulator activity;protein binding;protein phosphatase inhibitor activity;protein phosphatase regulator activity;protein phosphatase type 2A regulator activity	biological regulation;biosynthetic process;cell cycle;cell differentiation;cellular component assembly;cellular component disassembly;cellular component organization;cellular macromolecular complex assembly;cellular metabolic process;cellular nitrogen compound metabolic process;cellular process;chromatin organization;chromosome organization;developmental process;DNA metabolic process;DNA replicat…	cell part;cytoplasm;cytosol;endoplasmic reticulum;intracellular membrane-bounded organelle;intracellular organelle;macromolecular complex;nucleoplasm;nucleus;organelle;protein complex			9	9	9	37.6	37.6	37.6	31.124	0	208.34	3218100000	60	7	8	6	10	0	4	4	5	4	6	6	A0A0C4DFV9;Q01105;A0A087X027;P0DME0	A0A0C4DFV9;Q01105;A0A087X027;P0DME0	Protein SET;Protein SETSIP	SET;SETSIP		266;290;292;302
0.0700703	0	0.323215	0.478842	0.655672	0.843559	-0.100275	-0.095356	-0.0177097	-0.201611	binding;chromatin binding	biological regulation;biosynthetic process;cellular metabolic process;cellular nitrogen compound metabolic process;cellular process;developmental process;macromolecule metabolic process;metabolic process;multicellular organismal development;multicellular organismal process;nitrogen compound metabolic process;nucleobase-containing compound metabolic process;primary metabolic process;RNA metabolic …	cell part;cytoplasm;macromolecular complex;nucleoplasm;protein complex;transcription elongation factor complex			4	4	4	11.1	11.1	11.1	58.499	0	15.395	186840000	25	3	2	3	3	2	1	1	2	3	2	3	A0A0C4DFX9;Q9H3P2;C9JHL4;H0Y3X6;H7C0W2;C9JEM7;H7C2C7;H7C3C2;F8W954;F8WF98;H7C2M8	A0A0C4DFX9;Q9H3P2;C9JHL4;H0Y3X6;H7C0W2;C9JEM7;H7C2C7	Negative elongation factor A	NELFA		539;528;294;532;187;208;246;65;86;102;125
-0.353306	-0.241999	0.11055	0.301109	0.742073	0.546858	-0.258154	0	0.0246582	-0.533514	binding;laminin receptor activity;receptor activity;ribonucleoprotein binding;ribosome binding;structural constituent of ribosome;structural molecule activity	biological adhesion;biosynthetic process;catabolic process;cell adhesion;cellular component assembly;cellular component disassembly;cellular component organization;cellular macromolecular complex assembly;cellular metabolic process;cellular nitrogen compound metabolic process;cellular process;establishment of localization;macromolecular complex assembly;macromolecule metabolic process;metabolic p…	cell part;cytoplasm;cytosol;extracellular organelle;intracellular membrane-bounded organelle;intracellular organelle;macromolecular complex;membrane;nucleus;organelle;plasma membrane;preribosome;ribonucleoprotein complex;small ribosomal subunit;vesicle	Ribosome		13	13	13	55.1	55.1	55.1	29.404	0	170.89	4469400000	98	8	12	11	13	6	7	8	9	8	7	9	C9J9K3;A0A0C4DG17;P08865;F8WD59	C9J9K3;A0A0C4DG17;P08865;F8WD59	40S ribosomal protein SA	RPSA		263;300;295;116
0.179495	0.364798	-0.0519047	-0.545298	-0.639919	-2.68166	-0.415359	0.225882	-0.107841	0.0972748	binding;catalytic activity;endopeptidase activity;hydrolase activity;peptidase activity;peptidase activity, acting on L-amino acid peptides;protein binding;serine hydrolase activity;serine-type endopeptidase activity;serine-type peptidase activity;unfolded protein binding	anatomical structure development;behavior;biological regulation;catabolic process;cell communication;cell development;cellular component organization;cellular lipid metabolic process;cellular metabolic process;cellular process;developmental process;lipid metabolic process;macromolecule metabolic process;metabolic process;mitochondrion organization;multicellular organismal process;organelle organi…	cell part;cytoskeleton;cytosol;endoplasmic reticulum;intracellular membrane-bounded organelle;intracellular non-membrane-bounded organelle;intracellular organelle;macromolecular complex;membrane;mitochondrion;nucleus;organelle;protein complex;receptor complex	Parkinson's disease	PDZ;Tryp_SPc	10	10	10	35.9	35.9	35.9	45.112	0	62.251	770010000	63	9	6	6	4	0	5	3	4	8	8	10	A0A0C4DG44;O43464	A0A0C4DG44;O43464	Serine protease HTRA2, mitochondrial	HTRA2		423;458
-0.0610428	-0.117596	0.173138	0.677231	0.612286	0.0951843	-0.239128	-0.231251	0	-0.280783	adenyl nucleotide binding;adenyl ribonucleotide binding;ATP binding;ATPase activity;ATPase activity, coupled;ATP-dependent helicase activity;ATP-dependent RNA helicase activity;binding;catalytic activity;helicase activity;hydrolase activity;hydrolase activity, acting on acid anhydrides;hydrolase activity, acting on acid anhydrides, in phosphorus-containing anhydrides;nucleic acid binding;nucleosi…	biological regulation;cellular metabolic process;cellular nitrogen compound metabolic process;cellular process;macromolecule metabolic process;metabolic process;mRNA metabolic process;mRNA processing;nitrogen compound metabolic process;nucleobase-containing compound metabolic process;primary metabolic process;RNA metabolic process;RNA processing;RNA splicing	cell part;cytoplasm;intracellular membrane-bounded organelle;intracellular non-membrane-bounded organelle;intracellular organelle;nucleolus;nucleus;organelle	Spliceosome	DEXDc;HELICc	23	23	23	23	23	23	117.46	0	104.82	2002000000	98	10	12	14	14	3	7	4	6	8	9	11	A0A0C4DG89;Q7L014;D6RJA6;H0Y9U3	A0A0C4DG89;Q7L014	Probable ATP-dependent RNA helicase DDX46	DDX46		1032;1031;471;70
0	-0.112455	-0.706751	-0.597387	-0.890352	-3.60983	0.0691929	0.20874	0.151884	0.310921	binding;carboxylic acid binding;catalytic activity;coenzyme binding;cofactor binding;dodecenoyl-CoA delta-isomerase activity;fatty acid binding;fatty-acyl-CoA binding;intramolecular oxidoreductase activity;intramolecular oxidoreductase activity, transposing C=C bonds;isomerase activity;lipid binding;monocarboxylic acid binding;protein binding;receptor binding	catabolic process;cellular ketone metabolic process;cellular lipid metabolic process;cellular metabolic process;cellular process;lipid metabolic process;metabolic process;organic acid metabolic process;primary metabolic process;small molecule metabolic process	cell part;intracellular membrane-bounded organelle;intracellular organelle;membrane;mitochondrion;nucleoplasm;organelle	Fatty acid metabolism;Peroxisome		18	18	18	59.6	59.6	59.6	40.183	0	303.96	2657500000	126	14	10	15	10	1	16	11	8	11	13	17	A0A0C4DGA2;O75521;F8WAW4;F1LLU7;C9JB63;F8W6J1	A0A0C4DGA2;O75521	Enoyl-CoA delta isomerase 2, mitochondrial	ECI2		364;394;140;197;220;152
-0.79804	-0.101835	-0.14793	-0.151495	0	-3.1418	-0.686896	0.305948	0.199749	0.190552		biological regulation;cellular process;immune system process;response to stimulus;signal transduction			BACK;BTB;Kelch	2	2	2	3.1	3.1	3.1	69.155	0.007057	2.0752	1597800000	6	1	0	1	1	0	0	2	0	1	0	0	A0A0C4DGF2;Q8WZ60	A0A0C4DGF2;Q8WZ60	Kelch-like protein 6	KLHL6		610;621
-0.737888	0.265629	0.0234795	0.487736	-0.835414	-2.75977	-0.0234795	-0.0701847	-0.0962753	-0.600565	binding;calcium channel inhibitor activity;calcium channel regulator activity;channel inhibitor activity;channel regulator activity;cytoskeletal protein binding;ion channel inhibitor activity;lipid binding;phospholipid binding;protein binding	biological regulation;cellular component organization;cellular membrane organization;cellular process;cytoskeleton organization;endocytosis;establishment of localization;membrane invagination;membrane organization;organelle organization;regulation of transport;transport;vesicle-mediated transport	cell part;cytoplasm;endosome;extracellular organelle;intracellular membrane-bounded organelle;intracellular organelle;membrane;nucleoplasm;organelle;plasma membrane;vesicle		FCH;SH3	3	3	3	10.4	10.4	10.4	46.494	0	7.7579	81646000	10	2	1	1	1	0	1	1	1	0	1	1	A0A0C4DGG1;Q9UKS6;E9PJ33;H0YDM6;E9PJ75;E9PNM9;E9PIY1	A0A0C4DGG1;Q9UKS6	Protein kinase C and casein kinase substrate in neurons protein 3	PACSIN3		405;424;69;76;142;148;320
-0.449873	-0.153069	0.155798	0.0751438	0.0529785	-0.199722	0	0.132837	-0.231232	-0.240757	adenyl nucleotide binding;adenyl ribonucleotide binding;ATP binding;ATPase activity;ATPase activity, coupled;ATP-dependent DNA helicase activity;ATP-dependent helicase activity;binding;catalytic activity;cation binding;DNA binding;DNA helicase activity;DNA-dependent ATPase activity;helicase activity;hydrolase activity;hydrolase activity, acting on acid anhydrides;hydrolase activity, acting on aci…	biological regulation;biosynthetic process;cell differentiation;cellular component assembly;cellular component organization;cellular metabolic process;cellular nitrogen compound metabolic process;cellular process;chromatin modification;chromatin organization;chromosome organization;cytoskeleton organization;developmental process;DNA geometric change;DNA metabolic process;histone modification;macr…	cell part;centrosome;chromatin remodeling complex;cytoplasm;cytoskeleton;intracellular membrane-bounded organelle;intracellular non-membrane-bounded organelle;intracellular organelle;macromolecular complex;membrane;microtubule organizing center;nucleolus;nucleoplasm;nucleus;organelle;protein complex;transcriptional repressor complex		CHROMO;DEXDc;HELICc;PHD;RING	11	11	11	9.6	9.6	9.6	215.49	0	92.662	339550000	33	3	6	5	3	1	3	1	0	1	6	4	A0A2R8Y425;A0A2R8Y5J0;A0A2R8YFK9;A0A2U3TZM0;A0A2R8YFD8;F5GWX5;A0A2R8Y212;A0A2R8Y521;A0A0C4DGG9;Q14839;A0A2R8YD40;A0A2R8YDJ9;A0A2R8YDW2;A0A2R8Y4X2;A0A2R8YER1;A0A2R8Y8C1;A0A2R8Y685;A0A2R8Y5Z7;Q8TDI0;A0A2R8Y7M9;A0A2R8Y7I0;K7EMY3;A0A2R8Y8B3;A0A2R8YE38;A0A2R8Y5M9;Q12873;A0A2R8Y445;F2Z2R5;I3L229;H7C3H7;F5H6N4;H7C0J3	A0A2R8Y425;A0A2R8Y5J0;A0A2R8YFK9;A0A2U3TZM0;A0A2R8YFD8;F5GWX5;A0A2R8Y212;A0A2R8Y521;A0A0C4DGG9;Q14839;A0A2R8YD40;A0A2R8YDJ9;A0A2R8YDW2;A0A2R8Y4X2;A0A2R8YER1;A0A2R8Y8C1;A0A2R8Y685;A0A2R8Y5Z7;Q8TDI0	Chromodomain-helicase-DNA-binding protein 4;Chromodomain-helicase-DNA-binding protein 5	CHD4;CHD5		1889;1892;1899;1902;1903;1905;1914;1920;1937;1912;1484;1554;1215;1262;1645;1669;1377;1425;1954;560;605;1060;1147;458;554;2000;249;1225;249;277;354;383
0.0972157	0.137426	0.092535	-0.092535	0.115267	-2.3345	-0.110268	-0.673635	-0.288549	-0.360426	binding;protein binding;receptor binding	biological regulation;cell activation;cell proliferation;cellular process;immune system process;response to stimulus	cell part;extracellular organelle;organelle;vesicle	Cell adhesion molecules (CAMs)	IG;IGc1;IGc2;IGv	7	7	7	32	32	32	41.767	0	86.418	955720000	53	6	4	6	5	0	5	3	7	2	8	7	A0A0C4DGH0;Q5ZPR3;H0YLT8;H0YN85;H0YK40;H0YK59;H0YL10;H0YN29	A0A0C4DGH0;Q5ZPR3	CD276 antigen	CD276	1	388;534;132;136;156;165;199;170
0	0.218796	-0.519621	-0.545298	-0.719381	-0.555119	0.474354	1.0234	0.858534	0.835285	binding;catalytic activity;cation binding;dUTP diphosphatase activity;hydrolase activity;hydrolase activity, acting on acid anhydrides;hydrolase activity, acting on acid anhydrides, in phosphorus-containing anhydrides;ion binding;magnesium ion binding;metal ion binding;nucleoside-triphosphate diphosphatase activity;pyrophosphatase activity	biosynthetic process;catabolic process;cellular aromatic compound metabolic process;cellular metabolic process;cellular nitrogen compound metabolic process;cellular process;DNA metabolic process;DNA replication;heterocycle metabolic process;macromolecule metabolic process;metabolic process;nitrogen compound metabolic process;nucleobase-containing compound catabolic process;nucleobase-containing c…	cell part;extracellular organelle;intracellular membrane-bounded organelle;intracellular organelle;mitochondrion;nucleoplasm;nucleus;organelle;vesicle	Pyrimidine metabolism		6	6	6	51.1	51.1	51.1	15.395	0	70.45	524520000	37	5	4	2	1	1	5	4	3	3	4	5	A0A0C4DGL3;H0YNW5;P33316;H0YKC5;H0YMP1;H0YMM5;H0YNJ9;H0YKI0	A0A0C4DGL3;H0YNW5;P33316;H0YKC5;H0YMP1;H0YMM5;H0YNJ9;H0YKI0	Deoxyuridine 5-triphosphate nucleotidohydrolase, mitochondrial	DUT		141;167;252;221;107;133;143;226
-0.715764	-0.468702	-0.0910664	-0.358931	0.0910664	1.82338	0.173952	0.36305	0.491796	-0.20669	binding;cation binding;enzyme activator activity;enzyme regulator activity;GTPase activator activity;GTPase regulator activity;ion binding;metal ion binding;nucleoside-triphosphatase regulator activity;transition metal ion binding;zinc ion binding	biological regulation;cellular process;locomotion;response to chemical stimulus;response to external stimulus;response to stimulus;signal transduction	cell part;cytoplasm;cytosol;membrane	Endocytosis;Epithelial cell signaling in Helicobacter pylori infection;Regulation of actin cytoskeleton	ANK;ArfGap;GIT	7	7	4	13.9	13.9	9.6	83.131	0	11.836	137360000	18	1	3	1	4	2	2	1	0	2	1	1	A0A0C4DGN6;Q9Y2X7;J3QRU8;K7EN79;J3QLH1	A0A0C4DGN6;Q9Y2X7;J3QRU8	ARF GTPase-activating protein GIT1	GIT1		747;761;694;173;228
-0.0360432	0.10117	-0.280573	-0.81764	0.280107	-2.28134	-0.518905	-0.884235	0	-0.0899868		biological regulation;cellular metabolic process;cellular process;macromolecule metabolic process;macromolecule modification;metabolic process;phosphorus metabolic process;primary metabolic process;protein dephosphorylation;protein metabolic process;protein modification process	cell part;DNA-directed RNA polymerase II, holoenzyme;macromolecular complex;protein complex		RPR	7	5	5	31.8	26.3	26.3	32.916	0	26.938	202100000	7	0	2	2	1	0	0	0	0	0	1	1	A0A0C4DGQ6;Q96P16;K7EP82;K7EQR8	A0A0C4DGQ6;Q96P16	Regulation of nuclear pre-mRNA domain-containing protein 1A	RPRD1A		289;312;123;73
-0.00805378	0.0380602	-0.0603819	-0.0531015	-0.0306959	-2.05685	0.149791	0.0766668	0.00805378	0.194633	catalytic activity;oxidoreductase activity		cell part;membrane			2	2	2	12.8	12.8	12.8	13.61	0	4.7502	73271000	6	0	3	1	0	0	1	1	0	0	0	0	J3KRS1;A0A0C4DGQ8;Q6IAN0	J3KRS1;A0A0C4DGQ8;Q6IAN0	Dehydrogenase/reductase SDR family member 7B	DHRS7B		125;310;325
0.0221233	0.333405	-0.00259399	-0.101475	-0.0520821	-0.834099	0.128975	0	0.0212727	0.116434	catalytic activity;dolichyl-diphosphooligosaccharide-protein glycotransferase activity;oligosaccharyl transferase activity;transferase activity;transferase activity, transferring glycosyl groups;transferase activity, transferring hexosyl groups	biosynthetic process;carbohydrate metabolic process;cell activation;cellular metabolic process;cellular process;establishment of localization;immune system process;macromolecule metabolic process;macromolecule modification;metabolic process;peptidyl-amino acid modification;primary metabolic process;protein glycosylation;protein metabolic process;protein modification process;protein targeting;prot…	cell part;endoplasmic reticulum;intracellular membrane-bounded organelle;intracellular organelle;macromolecular complex;membrane;organelle;protein complex	N-Glycan biosynthesis;Protein processing in endoplasmic reticulum;Various types of N-glycan biosynthesis		12	12	12	37.4	37.4	37.4	48.799	0	60.294	1136500000	64	5	6	8	8	2	5	5	6	7	4	8	A0A0C4DGS1;P39656;U3KQ84	A0A0C4DGS1;P39656	Dolichyl-diphosphooligosaccharide--protein glycosyltransferase 48 kDa subunit	DDOST		439;456;154
0.15093	-0.181816	0.0713005	0.338247	0.460932	0.0989075	-0.369635	-0.403912	-0.160915	-0.490911		anatomical structure morphogenesis;biological regulation;catabolic process;cell cycle;cell proliferation;cellular metabolic process;cellular process;developmental process;immune system process;macromolecule metabolic process;macromolecule modification;metabolic process;mitotic cell cycle;primary metabolic process;protein metabolic process;protein modification by small protein conjugation or remov…	cell part;cytosol;macromolecular complex;nucleoplasm;protein complex;ubiquitin ligase complex	Cell cycle;Cell cycle - yeast;Circadian rhythm - mammal;Oocyte meiosis;Protein processing in endoplasmic reticulum;TGF-beta signaling pathway;Ubiquitin mediated proteolysis;Wnt signaling pathway	CULLIN;Cullin_Nedd8	15	15	15	25.3	25.3	25.3	87.387	0	52.676	322750000	25	1	1	8	4	1	4	0	1	1	2	2	A0A0C4DGX4;Q13616	A0A0C4DGX4;Q13616	Cullin-1	CUL1		752;776
0.0491829	0.11841	0	0.0907307	-0.0251999	0.182903	-0.489145	-0.083889	-0.03965	0.0330639	adenyl nucleotide binding;adenyl ribonucleotide binding;ATP binding;binding;catalytic activity;cyclin-dependent protein kinase activity;identical protein binding;kinase activity;non-membrane spanning protein tyrosine kinase activity;nucleotide binding;phosphotransferase activity, alcohol group as acceptor;protein binding;protein kinase activity;protein serine/threonine kinase activity;protein tyr…	biological regulation;cell communication;cell death;cell differentiation;cell motility;cell proliferation;cellular component movement;cellular component organization;cellular metabolic process;cellular process;cytoskeleton organization;death;developmental process;immune system process;locomotion;macromolecule metabolic process;macromolecule modification;metabolic process;mitosis;nuclear division;…	cell part;cell projection;cytoplasm;intracellular membrane-bounded organelle;intracellular organelle;nucleoplasm;nucleus;organelle		S_TKc;SH2;SH3;TyrKc	17	17	17	22.5	22.5	22.5	89.437	0	70.984	1054400000	60	4	3	10	6	4	3	3	4	5	8	10	A0A0D9SEI3;A0A0D9SER5;A0A0D9SEN2;P21127;Q5QPR3;Q9UQ88;Q5QPR4;Q5QPQ9;E9PFJ2;A0A087WYI9;A0A087X1I0;J3KS35;E7ESP2;Q13882	A0A0D9SEI3;A0A0D9SER5;A0A0D9SEN2;P21127;Q5QPR3;Q9UQ88;Q5QPR4	Cyclin-dependent kinase 11B;Cyclin-dependent kinase 11A	CDK11B;CDK11A		772;783;785;795;779;783;746;37;151;203;244;407;420;451
0.058672	1.22075	0.299397	-0.119101	-0.058672	-2.6565	0.120333	-0.105066	-0.243628	-0.120537	binding;nucleotide binding	biological regulation;biosynthetic process;cell differentiation;cellular metabolic process;cellular nitrogen compound metabolic process;cellular process;developmental process;establishment of localization;macromolecule metabolic process;metabolic process;mRNA metabolic process;mRNA processing;nitrogen compound metabolic process;nuclear transport;nucleobase-containing compound metabolic process;nu…	cell part;intracellular membrane-bounded organelle;intracellular organelle;nucleoplasm;nucleus;organelle	Spliceosome	RRM	4	2	2	14.3	8.7	8.7	43.647	0	14.905	141490000	6	2	1	0	1	1	0	0	0	0	1	0	A0A0D9SEM4;Q08170	A0A0D9SEM4;Q08170	Serine/arginine-rich splicing factor 4	SRSF4		378;494
-0.0682182	-0.131786	-0.0042057	-0.318869	0	-0.494421	0.0852547	0.438711	0.425964	0.531528	protein binding transcription factor activity;transcription cofactor activity;transcription corepressor activity;transcription factor binding transcription factor activity	anatomical structure morphogenesis;biological regulation;biosynthetic process;cellular metabolic process;cellular nitrogen compound metabolic process;cellular process;developmental process;macromolecule metabolic process;metabolic process;nitrogen compound metabolic process;nucleobase-containing compound metabolic process;primary metabolic process;response to stimulus;RNA metabolic process;signal…	cell part;extracellular space;intracellular membrane-bounded organelle;intracellular organelle;nucleoplasm;nucleus;organelle		WD40	14	14	10	26.3	26.3	19.4	83.183	0	75.105	1159400000	67	7	8	7	5	3	6	5	3	6	11	6	A0A0D9SES8;H0YKT5;H0YKN8;H0YL70;Q04726;F5H7D6;H0YNT2;H0YNI7;H0YLI3;H0YKH0;H0YLW9;K7EMK7;Q04725;K7EJR7	A0A0D9SES8;H0YKT5;H0YKN8;H0YL70;Q04726;F5H7D6;H0YNT2;H0YNI7	Transducin-like enhancer protein 3	TLE3		772;774;778;782;772;699;716;353;611;445;448;744;743;280
-0.344629	-0.294361	0.101395	0	0.291695	1.04501	0.00383377	0.0409431	-0.00758171	-0.226917	adenyl nucleotide binding;adenyl ribonucleotide binding;ATP binding;ATPase activity;ATPase activity, coupled;ATP-dependent DNA helicase activity;ATP-dependent helicase activity;ATP-dependent RNA helicase activity;binding;catalytic activity;CTPase activity;DNA binding;DNA helicase activity;DNA-dependent ATPase activity;eukaryotic initiation factor 4E binding;GTPase activity;helicase activity;hydro…	biological regulation;biosynthetic process;cell motility;cellular component assembly;cellular component movement;cellular component organization;cellular macromolecular complex assembly;cellular metabolic process;cellular nitrogen compound metabolic process;cellular process;chromosome segregation;developmental process;DNA geometric change;DNA metabolic process;immune system process;locomotion;mac…	cell part;cytoplasm;extracellular organelle;intracellular membrane-bounded organelle;intracellular non-membrane-bounded organelle;intracellular organelle;macromolecular complex;membrane;nucleolus;nucleus;organelle;ribonucleoprotein complex;vesicle	RIG-I-like receptor signaling pathway	DEXDc;HELICc	33	33	33	56.4	56.4	56.4	70.839	0	251.23	6285300000	202	16	24	27	20	11	16	15	14	14	22	23	A0A0D9SFB3;A0A2R8YF78;A0A0D9SG12;A0A2R8YFS5;A0A2R8Y4A4;A0A0D9SF53;O00571;A0A2R8YCW1;A0A2R8YFR4;A0A2U3TZJ9;A0A2R8Y645;A0A2R8Y5G6;F6S8Q4;A0A2R8YDT5;A0A2R8Y7T2;A0A2R8YDH3;O15523;A0A0J9YVQ7;A0A2R8YCU0;A0A087WVZ1;A0A2R8Y650;A0A2R8YF89;A0A087WX09;C9J8G5;C9J081;A0A2R8Y770;A0A2R8Y4D2;D6RCM4;Q9NQI0	A0A0D9SFB3;A0A2R8YF78;A0A0D9SG12;A0A2R8YFS5;A0A2R8Y4A4;A0A0D9SF53;O00571;A0A2R8YCW1;A0A2R8YFR4;A0A2U3TZJ9;A0A2R8Y645;A0A2R8Y5G6;F6S8Q4;A0A2R8YDT5;A0A2R8Y7T2;A0A2R8YDH3;O15523	ATP-dependent RNA helicase DDX3X;ATP-dependent RNA helicase DDX3Y	DDX3X;DDX3Y		640;641;647;661;662;733;662;647;660;661;716;622;629;475;476;503;660;222;181;189;193;96;98;224;250;61;78;518;724
0.0492191	-0.430687	-0.114561	0.31946	-0.717	-2.33815	-0.109695	-0.756511	-0.771892	-0.439014	binding;cation binding;cytoskeletal protein binding;DNA binding;enzyme binding;histone binding;histone deacetylase binding;ion binding;metal ion binding;nucleic acid binding;phosphoprotein binding;protein binding;ribonucleoprotein binding;scaffold protein binding;transition metal ion binding;tubulin binding;zinc ion binding	biological regulation;biosynthetic process;cellular metabolic process;cellular nitrogen compound metabolic process;cellular process;macromolecule metabolic process;metabolic process;nitrogen compound metabolic process;nucleobase-containing compound metabolic process;primary metabolic process;RNA metabolic process	cell part;intracellular membrane-bounded organelle;intracellular non-membrane-bounded organelle;intracellular organelle;kinetochore;macromolecular complex;nucleolus;nucleoplasm;nucleus;organelle;protein complex		PHD	2	2	2	9.3	9.3	9.3	36.43	0	6.9325	58400000	8	1	1	2	1	0	0	0	1	1	1	0	Q5JRC6;A0A0D9SGE8;Q8IWS0	Q5JRC6;A0A0D9SGE8;Q8IWS0	PHD finger protein 6	PHF6		324;366;365
0	-0.494635	-0.163774	-0.663325	0.143797	-2.49178	-0.743882	-0.770211	-0.906336	-0.494497	antigen binding;binding;natural killer cell lectin-like receptor binding;protein binding;receptor binding	biological regulation;cell activation;cell death;cell killing;cellular process;death;immune system process;response to abiotic stimulus;response to chemical stimulus;response to external stimulus;response to extracellular stimulus;response to heat;response to oxidative stress;response to stimulus;response to stress;signal transduction;viral reproduction	cell part;cell surface;membrane;plasma membrane	Natural killer cell mediated cytotoxicity	IGc1	3	3	3	14.8	14.8	14.8	39.181	0	18.444	101740000	9	2	2	1	2	0	0	0	0	1	1	0	F5H7Q8;A0A140T979;X6R344;A0A0G2JH58;A0A140T9H4;A0A140T9D8;A0A0G2JHB5;A0A0G2JH91;Q29980;A0A140T9M6	F5H7Q8;A0A140T979;X6R344;A0A0G2JH58;A0A140T9H4;A0A140T9D8;A0A0G2JHB5;A0A0G2JH91;Q29980	MHC class I polypeptide-related sequence B	MICB	1	351;360;383;383;317;340;340;340;383;383
0.355452	0.0423374	0.393604	0.110174	0	-1.12563	-0.286097	-1.39775	-0.950806	-0.238054	binding;ion channel binding;protein binding;receptor binding	biological regulation;cellular component assembly;cellular component organization;cellular localization;cellular macromolecular complex assembly;cellular process;cytoskeleton organization;localization;macromolecular complex assembly;multicellular organismal process;neurological system process;organelle organization;protein complex assembly;protein polymerization;regulation of transport;response t…	cell part;cell projection;cytosol;intracellular non-membrane-bounded organelle;intracellular organelle;neuron projection;organelle	Focal adhesion;Regulation of actin cytoskeleton;Shigellosis	FH2	13	13	13	13.9	13.9	13.9	136.85	0	54.876	416210000	53	9	9	10	6	0	1	0	0	1	6	11	H9KV28;A0A140T8Z0;A0A0G2JH68;O60610;A0A2R8Y5N1;H7C2W8	H9KV28;A0A140T8Z0;A0A0G2JH68;O60610;A0A2R8Y5N1	Protein diaphanous homolog 1	DIAPH1		1228;1263;1272;1272;1250;74
0.350166	0.378887	0.201895	0.109373	0	-1.06608	-0.365492	-0.327185	-0.20586	-0.236603						62	62	37	90.7	90.7	62.8	70.108	0	323.31	137600000000	711	84	81	76	67	35	52	48	52	67	65	84	A0A0G2JIW1;P0DMV9;P0DMV8;V9GZ37	A0A0G2JIW1;P0DMV9;P0DMV8;V9GZ37	Heat shock 70 kDa protein 1B;Heat shock 70 kDa protein 1A	HSPA1B;HSPA1A		642;641;641;476
-0.772503	-0.431429	-0.512456	-0.388651	-0.665894	-2.28514	0	0.901022	0.489292	0.0272064	catalytic activity;hydrolase activity		cell part			2	2	2	3.2	3.2	3.2	67.518	0	4.063	53799000	11	1	0	1	1	1	1	1	1	2	1	1	A0A0G2JJD3;O95870;A0A0G2JI89	A0A0G2JJD3;O95870;A0A0G2JI89	Abhydrolase domain-containing protein 16A	ABHD16A		601;558;263
0.348272	0.628286	0.434031	-0.0715313	0.143316	-0.473112	-0.314516	-0.480005	-0.0719566	0	binding;chromatin binding;histone acetyl-lysine binding;histone binding;protein binding	biological regulation;biosynthetic process;cellular component assembly;cellular component organization;cellular macromolecular complex assembly;cellular metabolic process;cellular nitrogen compound metabolic process;cellular process;chromatin modification;chromatin organization;chromosome organization;macromolecular complex assembly;macromolecule metabolic process;metabolic process;multicellular …	cell part;cytoplasm;intracellular membrane-bounded organelle;intracellular organelle;nucleus;organelle		BROMO	9	9	8	18.3	18.3	16.7	88.288	0	32.514	412070000	31	5	3	5	3	1	0	0	1	2	5	6	H0Y6K2;A0A140T9E9;A0A0G2JK44;P25440;A0A140T9V2;U3KQA6;A0A0G2JHL0;A0A140T9F7;A0A0G2JHN8;A0A140T9I1;E9PIQ3;H0Y799;A0A140T9X8;H0YDJ7;E9PKQ9;U3KPW0	H0Y6K2;A0A140T9E9;A0A0G2JK44;P25440;A0A140T9V2;U3KQA6;A0A0G2JHL0;A0A140T9F7	Bromodomain-containing protein 2	BRD2		807;807;836;801;648;552;613;619;328;363;401;296;296;137;147;159
-0.00413513	-0.379379	-0.685456	0.285418	0.00413513	-2.77915	0.46516	-0.610505	-0.512631	-0.0351257	binding;catalytic activity;methyltransferase activity;protein binding;protein domain specific binding;S-adenosylmethionine-dependent methyltransferase activity;S-methyltransferase activity;thiopurine S-methyltransferase activity;transferase activity;transferase activity, transferring one-carbon groups	amine metabolic process;cell death;cell junction organization;cellular amino acid metabolic process;cellular component assembly;cellular component disassembly;cellular component organization;cellular ketone metabolic process;cellular metabolic process;cellular nitrogen compound metabolic process;cellular process;cofactor metabolic process;death;heterocycle metabolic process;macromolecular complex…	cell part;cytoplasmic membrane-bounded vesicle;cytosol;intracellular membrane-bounded organelle;intracellular organelle;membrane;organelle;plasma membrane;vesicle	Cell adhesion molecules (CAMs);Hepatitis C;Leukocyte transendothelial migration;Pathogenic Escherichia coli infection;Tight junction		6	6	6	19.7	19.7	19.7	59.129	0	30.927	319010000	17	2	1	1	4	0	2	1	1	0	2	3	A0A0G2JMZ8;Q16625	A0A0G2JMZ8;Q16625	Occludin	OCLN		522;522
0.446222	0.15148	0.356848	-0.0287361	-0.168688	-1.40737	0.233904	0	-0.565022	0.226793		anatomical structure development;anatomical structure formation involved in morphogenesis;anatomical structure morphogenesis;biological adhesion;biological regulation;cell adhesion;cell death;cell motility;cell proliferation;cellular component movement;cellular component organization;cellular membrane organization;cellular process;death;developmental process;endocytosis;establishment of localizat…	cell part;cell projection;extracellular organelle;macromolecular complex;membrane;nucleoplasm;organelle;plasma membrane;protein complex;vesicle		LRR_TYP;PDZ	24	24	23	24.7	24.7	23.9	174.91	0	160.7	1269200000	116	15	15	13	10	1	8	6	5	13	9	21	A0A0G2JNZ2;A0A0G2JPP5;Q14160;A0A0G2JMS7;H0YCG0	A0A0G2JNZ2;A0A0G2JPP5;Q14160;A0A0G2JMS7	Protein scribble homolog	SCRIB		1630;1655;1630;1549;650
0	0.180618	0.390045	0.0783215	0.275532	-0.826702	-0.29635	-0.0967579	0.105467	-0.189686	adenyl nucleotide binding;adenyl ribonucleotide binding;ATP binding;binding;catalytic activity;kinase activity;nucleotide binding;pantothenate kinase activity;phosphotransferase activity, alcohol group as acceptor;purine nucleotide binding;purine ribonucleoside triphosphate binding;purine ribonucleotide binding;ribonucleotide binding;transferase activity;transferase activity, transferring phospho…	biosynthetic process;cellular metabolic process;cellular nitrogen compound metabolic process;cellular process;cofactor metabolic process;heterocycle metabolic process;metabolic process;nitrogen compound metabolic process;nucleobase-containing compound metabolic process;nucleobase-containing small molecule metabolic process;nucleoside metabolic process;nucleotide metabolic process;primary metaboli…	cell part;cytoplasm	Pantothenate and CoA biosynthesis		19	19	19	35.7	35.7	35.7	81.385	0	134.35	506180000	63	7	12	6	9	0	3	1	4	5	6	10	A0A0G2JR38;E9PHT6;Q9NVE7;H0YA26;H0Y9E4;H0YA31;H0YA02;A0A0G2JQS7;D6RJF3	A0A0G2JR38;E9PHT6;Q9NVE7;H0YA26	Pantothenate kinase 4	PANK4		734;737;773;473;136;190;41;151;154
-0.584448	-0.329813	-0.0239944	0.419376	0.536118	0.498449	-0.188025	0	-0.353893	0.156546	binding;DNA binding;mRNA binding;nucleic acid binding;nucleotide binding;protein binding;protein binding transcription factor activity;protein C-terminus binding;RNA binding;transcription cofactor activity;transcription corepressor activity;transcription factor binding;transcription factor binding transcription factor activity	anatomical structure morphogenesis;biological regulation;cell motility;cellular component morphogenesis;cellular component movement;cellular component organization;cellular metabolic process;cellular nitrogen compound metabolic process;cellular process;developmental process;establishment of localization;locomotion;macromolecule metabolic process;metabolic process;mRNA metabolic process;mRNA proce…	cell part;cytoplasm;intracellular membrane-bounded organelle;intracellular organelle;nucleoplasm;nucleus;organelle		RRM	5	5	5	21.8	21.8	21.8	37.865	0	25.227	239070000	30	2	2	4	3	2	2	4	2	3	4	2	B0QYV1;A0A0G2JRA5;O43251;A0A0G2JRD1;S4R3K7;A0A0G2JSB3;I3L1D4;B0QYY7;S4R469;F8VR27;F8VZY7;B0QYY4;A0A087X2B1;J3KNW3;B7Z1U7;F8VZG9;A0A286YEU2;Q9NWB1;B0QYY6;J3QQZ2;J3QRF4;F8VRS4;A6NFN3	B0QYV1;A0A0G2JRA5;O43251;A0A0G2JRD1;S4R3K7;A0A0G2JSB3;I3L1D4;B0QYY7;S4R469;F8VR27;F8VZY7;B0QYY4;A0A087X2B1;J3KNW3;B7Z1U7;F8VZG9;A0A286YEU2;Q9NWB1	RNA binding protein fox-1 homolog;RNA binding protein fox-1 homolog 2;RNA binding protein fox-1 homolog 1	RBFOX2;RBFOX1		357;389;390;227;230;186;189;200;234;262;263;370;375;402;425;466;582;397;128;328;358;391;312
-0.0248203	0.243061	0.0785084	0.0389805	0.226196	0.318987	-0.197348	-0.16548	-0.32951	-0.15143	binding;DNA binding;identical protein binding;nucleic acid binding;nucleotide binding;protein binding	biological regulation;biosynthetic process;cell death;cellular metabolic process;cellular nitrogen compound metabolic process;cellular process;death;macromolecule metabolic process;metabolic process;mRNA metabolic process;mRNA processing;nitrogen compound metabolic process;nucleobase-containing compound metabolic process;primary metabolic process;RNA metabolic process;RNA processing;RNA splicing	cell part;Golgi apparatus;intracellular membrane-bounded organelle;intracellular organelle;macromolecular complex;mitochondrion;nucleoplasm;organelle;ribonucleoprotein complex	Spliceosome	RRM;RRM_1	19	19	19	49.5	49.5	49.5	54.626	0	113.72	1725400000	93	10	10	14	9	5	8	2	4	6	9	16	A0A0J9YYL3;A0A0J9YVP6;A0A0J9YXJ8;A0A0J9YXX5;Q9UHX1;A0A0J9YVR6;E9PQ56;A0A0J9YWM1;H0YEM1;E9PN18;E9PMU7;H0YCP8;E9PL19	A0A0J9YYL3;A0A0J9YVP6;A0A0J9YXJ8;A0A0J9YXX5;Q9UHX1;A0A0J9YVR6;E9PQ56;A0A0J9YWM1;H0YEM1	Poly(U)-binding-splicing factor PUF60	PUF60		505;534;522;551;559;314;322;329;336;263;247;273;228
0.0346909	-0.127468	0.141911	-0.0346909	0.238028	-2.50547	-0.0697346	-0.0422955	-0.409952	0.215666			cell part			12	12	12	17.7	17.7	17.7	116.15	0	38.903	399640000	50	4	6	5	6	0	4	1	2	5	10	7	A0A0J9YW40;Q6IEE7	A0A0J9YW40;Q6IEE7	Transmembrane protein 132E	TMEM132E	1	1074;984
0.029377	-0.0219898	-0.445898	-0.0497112	0.516272	-2.2137	0.0219898	-0.925847	-0.790212	-0.510009	catalytic activity;CDP-alcohol phosphatidyltransferase activity;CDP-diacylglycerol-serine O-phosphatidyltransferase activity;phosphotransferase activity, for other substituted phosphate groups;transferase activity;transferase activity, transferring phosphorus-containing groups	biosynthetic process;cellular lipid metabolic process;cellular metabolic process;cellular process;lipid metabolic process;metabolic process;primary metabolic process;small molecule metabolic process	cell part;membrane	Glycerophospholipid metabolism		2	2	2	5.6	5.6	5.6	45.902	0	4.2397	43866000	6	0	1	1	2	0	0	0	0	1	1	0	A0A0J9YWQ2;Q9BVG9	A0A0J9YWQ2;Q9BVG9	Phosphatidylserine synthase 2	PTDSS2		393;487
-0.33774	-0.195871	0.165695	-0.323984	0.164776	0	-0.365599	0.363581	0.29636	0.0904427	ATPase activator activity;ATPase regulator activity;binding;chaperone binding;DNA binding;enzyme activator activity;enzyme regulator activity;heat shock protein binding;nucleic acid binding;nucleoside-triphosphatase regulator activity;protein binding;protein binding involved in protein folding;unfolded protein binding	anatomical structure development;biological adhesion;biological regulation;cell adhesion;cell differentiation;cellular component organization;cellular localization;cellular metabolic process;cellular process;cytoskeleton organization;developmental process;extracellular matrix organization;extracellular structure organization;localization;macromolecule metabolic process;metabolic process;organelle…	cell part;cytoplasm;cytosol;extracellular organelle;intracellular membrane-bounded organelle;intracellular organelle;membrane;nucleoplasm;nucleus;organelle;vesicle		DnaJ	6	6	6	40.4	40.4	40.4	25.377	0	23.325	159880000	33	3	5	6	4	1	3	2	2	2	3	2	C9J2C4;A0A0J9YX62;O75190;C9J2P2;C9JDR7;C9JDX6;F8WCZ4;E9PH18;C9JB42;C9JN01;Q8WWF6;Q8NHS0	C9J2C4;A0A0J9YX62;O75190;C9J2P2;C9JDR7;C9JDX6;F8WCZ4;E9PH18	DnaJ homolog subfamily B member 6	DNAJB6		228;334;326;145;98;125;129;211;66;45;145;232
0.460075	0.379656	-0.0232086	-0.851206	-1.32641	-1.1831	0.270357	0.130051	0.379473	0	arylesterase activity;binding;carboxylic ester hydrolase activity;catalytic activity;cation binding;hydrolase activity;hydrolase activity, acting on ester bonds;identical protein binding;ion binding;metal ion binding;protein binding	catabolic process;cellular aromatic compound metabolic process;cellular metabolic process;cellular process;metabolic process;response to chemical stimulus;response to oxidative stress;response to stimulus;response to stress	cell part;extracellular region;intracellular membrane-bounded organelle;intracellular organelle;lysosome;membrane;mitochondrion;nucleus;organelle;plasma membrane;vacuole	Aminobenzoate degradation;Bisphenol degradation		2	2	2	7.3	7.3	7.3	37.98	0	8.1286	144210000	16	2	2	1	0	0	2	1	2	2	2	2	J3QT77;A0A0J9YYG4;A0A0J9YXF2;Q15165	J3QT77;A0A0J9YYG4;A0A0J9YXF2;Q15165	Serum paraoxonase/arylesterase 2	PON2	3	342;354;375;354
-0.806622	-0.747225	-0.140095	-0.00325394	0.706852	1.31208	0.00971985	0.223986	-0.335455	0.226582	binding;cation binding;ion binding;metal ion binding;nucleic acid binding;nucleotide binding;structural molecule activity;transition metal ion binding;zinc ion binding	biological regulation	cell part;intracellular membrane-bounded organelle;intracellular organelle;membrane;nucleoplasm;nucleus;organelle		RRM;ZnF_C2H2;ZnF_U1	31	31	31	39.1	39.1	39.1	94.622	0	323.31	6445700000	202	13	27	25	26	14	11	12	15	21	18	20	A0A0R4J2E8;A8MXP9;P43243;D6REM6;D6R991;H0Y8T4;B3KM87;D6RBK5;D6RBI2;D6RE02;D6RIA2;Q68E03;D6RAM9;D6RAY2;D6R8Z5;D6RB45;A0A1B0GX04;D6R9F3;D6RBS2;D6RCM3;D6REK4	A0A0R4J2E8;A8MXP9;P43243;D6REM6;D6R991	Matrin-3	MATR3		847;895;847;794;433;334;509;121;109;124;172;283;81;86;107;47;77;78;87;99;100
-0.411797	-0.12355	0	-0.842085	-0.083189	2.06385	1.1786	0.58606	0.344215	-0.197571	adenyl nucleotide binding;adenyl ribonucleotide binding;ATP binding;binding;cation binding;chaperone binding;chromatin binding;copper ion binding;core promoter binding;core promoter sequence-specific DNA binding;damaged DNA binding;DNA binding;enzyme binding;enzyme regulator activity;histone acetyltransferase binding;histone deacetylase regulator activity;identical protein binding;ion binding;kin…	aging;anatomical structure development;anatomical structure formation involved in morphogenesis;anatomical structure morphogenesis;behavior;biological regulation;biosynthetic process;cell activation;cell communication;cell cycle;cell death;cell differentiation;cell proliferation;cellular component assembly;cellular component organization;cellular localization;cellular membrane organization;cellul…	cell part;cytoplasm;cytosol;endoplasmic reticulum;intracellular membrane-bounded organelle;intracellular non-membrane-bounded organelle;intracellular organelle;macromolecular complex;mitochondrion;nucleolus;nucleoplasm;nucleus;organelle;protein complex	Amyotrophic lateral sclerosis (ALS);Apoptosis;Basal cell carcinoma;Bladder cancer;Cell cycle;Chronic myeloid leukemia;Colorectal cancer;Endometrial cancer;Glioma;Hepatitis C;Huntington's disease;MAPK signaling pathway;Measles;Melanoma;Neurotrophin signaling pathway;Non-small cell lung cancer;p53 signaling pathway;Pancreatic cancer;Pathways in cancer;Prostate cancer;Small cell lung cancer;Thyroid …		5	5	5	22.2	22.2	22.2	37.933	0	21.64	103360000	11	1	0	0	2	2	3	0	1	1	1	0	J3KP33;A0A0U1RQC9;P04637;E7ESS1;A0A087WZU8;A0A087WXZ1;A0A087WT22;A0A087X1Q1;E7EQX7;E9PFT5;E7EMR6	J3KP33;A0A0U1RQC9;P04637;E7ESS1;A0A087WZU8;A0A087WXZ1;A0A087WT22;A0A087X1Q1;E7EQX7	Cellular tumor antigen p53	TP53		343;410;393;199;382;182;187;234;285;155;165
0.107084	0.434086	0.715914	-0.010252	0.267174	0.708839	0	-0.5791	-0.527296	-0.142302						13	8	1	9	7	1	195.27	0	21.443	125130000	22	3	5	3	2	0	3	0	1	2	1	2	A0A0U1RQK7	A0A0U1RQK7				1774
-0.745175	-0.544878	0.506029	0	-0.150867	-2.06493	-0.719145	-0.884246	-0.860216	-0.493585	binding;cytoskeletal protein binding;identical protein binding;lipid binding;phosphatidic acid binding;phospholipid binding;protein binding;transporter activity	anatomical structure morphogenesis;biological regulation;cellular component assembly;cellular component morphogenesis;cellular component organization;cellular membrane organization;cellular process;cytoskeleton organization;developmental process;endocytosis;establishment of localization;membrane invagination;membrane organization;organelle organization;regulation of transport;transport;vesicle-me…	cell part;cytoplasm;cytoskeleton;cytosol;endosome;extracellular organelle;intracellular membrane-bounded organelle;intracellular non-membrane-bounded organelle;intracellular organelle;membrane;nucleoplasm;organelle;vesicle		FCH;SH3	3	3	3	7.8	7.8	7.8	51.828	0	8.2023	92645000	5	1	2	1	0	0	0	0	0	1	0	0	A0A0U1RR22;Q9UNF0;H0Y923;B0QYG7;B0QYG8	A0A0U1RR22;Q9UNF0	Protein kinase C and casein kinase substrate in neurons protein 2	PACSIN2		451;486;59;152;155
0	-0.0170498	-0.0785637	0.159325	0.238167	-2.18283	-0.799079	-0.691146	-0.286507	-0.365397	binding;calcium ion binding;cation binding;identical protein binding;ion binding;metal ion binding;protein binding;protein dimerization activity;protein heterodimerization activity	biological regulation;cellular component assembly;cellular component organization;cellular homeostasis;cellular ion homeostasis;cellular process;establishment of localization;homeostatic process;ion transport;macromolecular complex assembly;protein complex assembly;response to stimulus;response to stress;transmembrane transport;transport	cell part;intracellular;intracellular membrane-bounded organelle;intracellular organelle;macromolecular complex;membrane;mitochondrion;organelle;protein complex		EFh	3	3	3	6.9	6.9	6.9	54.578	0	5.8905	89120000	11	1	1	3	1	0	1	0	0	0	2	2	F6XEV2;A0A0U1RRK1;A0A286YF11;Q9BPX6;E9PQV6;S4R3W3;S4R3D7;S4R3V1	F6XEV2;A0A0U1RRK1;A0A286YF11;Q9BPX6;E9PQV6	Calcium uptake protein 1, mitochondrial	MICU1		478;480;482;476;246;154;212;388
-0.383258	-0.665392	0.150636	-0.00927448	0.00927448	-2.36908	-0.705931	-0.625695	-0.752132	-0.791997	binding;cation binding;DNA binding;ion binding;metal ion binding;nucleic acid binding;nucleic acid binding transcription factor activity;sequence-specific DNA binding;sequence-specific DNA binding transcription factor activity;transition metal ion binding;zinc ion binding	biosynthetic process;cellular component organization;cellular metabolic process;cellular nitrogen compound metabolic process;cellular process;chromatin modification;chromatin organization;chromosome organization;macromolecule metabolic process;metabolic process;nitrogen compound metabolic process;nucleobase-containing compound metabolic process;organelle organization;primary metabolic process;RNA…	cell part;macromolecular complex;nucleoplasm;protein complex			2	2	2	6.6	6.6	6.6	63.461	0	6.4429	41493000	9	0	1	3	2	0	0	1	1	0	0	1	A0A0U1RRM1;Q8WXI9;A0A0U1RR30	A0A0U1RRM1;Q8WXI9;A0A0U1RR30	Transcriptional repressor p66-beta	GATAD2B		577;593;263
-0.51313	-0.145088	-0.548742	-0.222799	-0.487982	2.59331	0.540356	0.359173	0.866331	0	binding;profilin binding;protein binding;protein domain specific binding;SH3 domain binding;WW domain binding	anatomical structure development;anatomical structure formation involved in morphogenesis;anatomical structure morphogenesis;biological regulation;cellular component assembly;cellular component organization;cellular process;cytoskeleton organization;developmental process;establishment of localization;immune system process;locomotion;macromolecular complex assembly;organelle organization;protein c…	cell part;cell projection;cytoplasm;cytoskeleton;cytosol;filopodium;intracellular non-membrane-bounded organelle;intracellular organelle;membrane;organelle;plasma membrane;synapse	Regulation of actin cytoskeleton	RanBD;WH1	7	7	7	13.6	13.6	13.6	87.399	0	31.079	245450000	32	2	2	3	3	7	4	1	3	1	3	3	A0A0U1RRM6;Q8N8S7;A0A075B6E5;A0A0U1RQP7;Q9UI08	A0A0U1RRM6;Q8N8S7;A0A075B6E5	Protein enabled homolog	ENAH		802;591;213;242;416
-0.339745	0.505905	0.165838	0	0.336231	-0.305113	-0.322056	-0.0315552	0.02071	-0.363169		biological regulation;biosynthetic process;cellular metabolic process;cellular nitrogen compound metabolic process;cellular process;macromolecule metabolic process;metabolic process;nitrogen compound metabolic process;nucleobase-containing compound metabolic process;primary metabolic process;RNA metabolic process;transcription elongation, DNA-dependent;transcription from RNA polymerase II promote…	cell part;cytoplasm;macromolecular complex;nucleoplasm;protein complex;transcription elongation factor complex			7	7	7	17.8	17.8	17.8	70.038	0	22.077	210150000	23	2	3	3	5	0	1	0	0	2	3	4	A0A0X1KG71;Q8WX92	A0A0X1KG71;Q8WX92	Negative elongation factor B	NELFB		628;580
-0.0651779	-0.569695	-0.742575	0	0.374153	-2.69597	-0.807557	-0.652196	-1.0504	-0.59349	catalytic activity;transferase activity;transferase activity, transferring glycosyl groups;transferase activity, transferring pentosyl groups		cell part;membrane			2	2	2	13	13	13	28.629	0	5.4372	20212000	6	0	1	2	1	0	0	0	0	0	0	2	A0A140T9D0;Q8NBI6	A0A140T9D0;Q8NBI6	Xyloside xylosyltransferase 1	XXYLT1		247;393
-0.14028	0.0342903	-0.2796	0	0.224363	-2.48188	0.662115	0.0236588	-0.679632	-0.0401497	active transmembrane transporter activity;adenyl nucleotide binding;adenyl ribonucleotide binding;ADP binding;antigen binding;ATP binding;ATPase activity;ATPase activity, coupled;ATPase activity, coupled to movement of substances;ATPase activity, coupled to transmembrane movement of substances;binding;catalytic activity;hydrolase activity;hydrolase activity, acting on acid anhydrides;hydrolase ac…	cellular process;establishment of localization;immune system process;interspecies interaction between organisms;multi-organism process;peptide transport;protein transport;response to stimulus;response to stress;transmembrane transport;transport	cell part;intracellular membrane-bounded organelle;intracellular organelle;macromolecular complex;membrane;mitochondrion;organelle;protein complex	ABC transporters;Antigen processing and presentation;Phagosome;Primary immunodeficiency	AAA	4	4	4	9.7	9.7	9.7	87.175	0	27.164	36989000	16	3	1	1	2	0	2	1	0	1	2	3	A0A140T9T7;Q03518;A0A0S2Z4R8	A0A140T9T7;Q03518	Antigen peptide transporter 1	TAP1		808;808;323
0.104932	0.42385	-0.0247393	-0.29544	-0.561767	-1.91076	0.328862	-0.181487	-0.755479	0.216193	aspartic-type endopeptidase activity;aspartic-type peptidase activity;catalytic activity;endopeptidase activity;hydrolase activity;peptidase activity;peptidase activity, acting on L-amino acid peptides;receptor activity	anatomical structure morphogenesis;biological regulation;cellular metabolic process;cellular process;developmental process;hormone metabolic process;macromolecule metabolic process;metabolic process;pigmentation;primary metabolic process;protein maturation;protein metabolic process	cell body;cell part;cell projection;extracellular organelle;membrane;neuron projection;organelle;plasma membrane;vesicle			6	6	6	28.2	28.2	28.2	32.905	0	33.36	406510000	22	3	2	1	1	0	2	4	2	3	2	2	A0A1B0GTB0;A0A1B0GVW0;O75787;A0A1B0GWJ8;H7C3E1;B7Z1I9;A0A1B0GTU8;A0A1B0GVB9;A0A1B0GUT7;A0A1C7CYW4;A0A1B0GVC7;B7Z413;A0A1B0GWD6;A0A1B0GW13;A0A1B0GVI9;A0A1B0GV60;A0A1B0GU12;H7C240;A0A1B0GV24;A0A1B0GVZ1	A0A1B0GTB0;A0A1B0GVW0;O75787;A0A1B0GWJ8;H7C3E1;B7Z1I9;A0A1B0GTU8;A0A1B0GVB9;A0A1B0GUT7;A0A1C7CYW4;A0A1B0GVC7;B7Z413;A0A1B0GWD6;A0A1B0GW13;A0A1B0GVI9;A0A1B0GV60;A0A1B0GU12	Renin receptor	ATP6AP2		294;345;350;258;262;272;301;317;331;349;242;274;186;186;196;209;273;128;143;101
0.782103	0.686357	-0.071228	-0.041008	-0.32403	-0.234283	0.146576	0.170572	0.096838	-0.315771	carnitine O-acyltransferase activity;carnitine O-palmitoyltransferase activity;catalytic activity;O-acyltransferase activity;O-palmitoyltransferase activity;palmitoyltransferase activity;transferase activity;transferase activity, transferring acyl groups;transferase activity, transferring acyl groups other than amino-acyl groups	amine transport;amino acid transport;catabolic process;cellular ketone metabolic process;cellular lipid metabolic process;cellular metabolic process;cellular process;establishment of localization;ion transport;lipid metabolic process;lipid transport;metabolic process;organic acid metabolic process;organic acid transport;primary metabolic process;small molecule metabolic process;transmembrane tran…	cell part;intracellular membrane-bounded organelle;intracellular non-membrane-bounded organelle;intracellular organelle;membrane;mitochondrion;nucleolus;nucleoplasm;organelle	Fatty acid metabolism;PPAR signaling pathway		9	9	9	25.4	25.4	25.4	71.181	0	36.764	203970000	29	4	4	4	1	1	1	1	1	1	3	8	A0A1B0GTB8;A0A1B0GWC0;A0A1B0GVF3;P23786;A0A1B0GV75;A0A1B0GTM0	A0A1B0GTB8;A0A1B0GWC0;A0A1B0GVF3;P23786;A0A1B0GV75	Carnitine O-palmitoyltransferase 2, mitochondrial	CPT2		635;647;670;658;598;223
0.440031	0.684595	0.155668	0.207651	-0.337917	-2.46787	-0.76919	-0.966442	-0.800597	-0.332912	binding;catalytic activity;cation binding;demethylase activity;DNA demethylase activity;DNA-N1-methyladenine dioxygenase activity;ferrous iron binding;ion binding;iron ion binding;metal ion binding;oxidative DNA demethylase activity;oxidative RNA demethylase activity;oxidoreductase activity;oxidoreductase activity, acting on paired donors, with incorporation or reduction of molecular oxygen;oxido…	anatomical structure development;biological regulation;cellular metabolic process;cellular nitrogen compound metabolic process;cellular process;developmental process;DNA metabolic process;DNA modification;homeostatic process;macromolecule metabolic process;macromolecule modification;metabolic process;multicellular organismal process;nitrogen compound metabolic process;nucleobase-containing compou…	cell part;intracellular membrane-bounded organelle;intracellular organelle;nucleus;organelle			6	6	6	19.3	19.3	19.3	51.802	0	27.109	125810000	24	6	3	4	1	0	1	0	1	1	2	5	A0A1B0GUC3;A0A1B0GV98;A0A1B0GTC5;A0A1B0GU26;A0A1B0GTC3;A0A1B0GVH5;Q9C0B1;A0A1B0GTI3;A0A1B0GTY1;A0A1B0GUY7;A0A1B0GTZ8;F8WCB8;X6R3I0	A0A1B0GUC3;A0A1B0GV98;A0A1B0GTC5;A0A1B0GU26;A0A1B0GTC3;A0A1B0GVH5;Q9C0B1;A0A1B0GTI3;A0A1B0GTY1;A0A1B0GUY7	Alpha-ketoglutarate-dependent dioxygenase FTO	FTO		450;455;457;481;533;559;505;275;421;173;66;70;129
0.404299	0.202217	0.132526	0	-0.231853	-3.32784	-0.0685978	-0.111795	-0.513185	0.179415	adenyl nucleotide binding;adenyl ribonucleotide binding;ATP binding;binding;nucleotide binding;purine nucleotide binding;purine ribonucleoside triphosphate binding;purine ribonucleotide binding;ribonucleotide binding		extracellular organelle;organelle;vesicle			4	4	4	8.2	8.2	8.2	77.018	0	10.233	78314000	7	2	0	1	1	0	1	0	0	0	0	2	A0A1B0GTF3;O43301	A0A1B0GTF3;O43301	Heat shock 70 kDa protein 12A	HSPA12A		692;675
0	0.0458927	-0.144941	-0.461916	-0.807634	-1.21702	0.367563	0.563627	0.205044	-0.505203	aldehyde dehydrogenase (NAD) activity;betaine-aldehyde dehydrogenase activity;catalytic activity;L-aminoadipate-semialdehyde dehydrogenase activity;oxidoreductase activity;oxidoreductase activity, acting on the aldehyde or oxo group of donors;oxidoreductase activity, acting on the aldehyde or oxo group of donors, NAD or NADP as acceptor	alcohol metabolic process;amine metabolic process;biosynthetic process;catabolic process;cellular aldehyde metabolic process;cellular amino acid metabolic process;cellular ketone metabolic process;cellular metabolic process;cellular nitrogen compound metabolic process;cellular process;metabolic process;multicellular organismal process;neurological system process;nitrogen compound metabolic proces…	cell part;cytoplasm;cytosol;extracellular organelle;intracellular membrane-bounded organelle;intracellular organelle;mitochondrion;nucleus;organelle;vesicle	Arginine and proline metabolism;Ascorbate and aldarate metabolism;beta-Alanine metabolism;Fatty acid metabolism;Glycerolipid metabolism;Glycine, serine and threonine metabolism;Glycolysis / Gluconeogenesis;Histidine metabolism;Lysine biosynthesis;Lysine degradation;Propanoate metabolism;Pyruvate metabolism;Tryptophan metabolism;Valine, leucine and isoleucine degradation		12	12	12	32.5	32.5	32.5	58.139	0	70.879	741500000	53	7	8	4	5	0	2	5	4	4	9	5	A0A1B0GTG2;A0A1B0GW77;P49419;A0A1B0GTY9;A0A1B0GUA1;A0A1B0GW82;A0A1B0GV49;A0A1B0GTJ4;A0A0J9YWF7;H0YHM6;A0A1B0GUY0;F8WDY6;F8VVF2;A0A1B0GVU0;A0A0J9YWM6;A0A1B0GW65;F8WD33	A0A1B0GTG2;A0A1B0GW77;P49419;A0A1B0GTY9;A0A1B0GUA1;A0A1B0GW82;A0A1B0GV49;A0A1B0GTJ4;A0A0J9YWF7	Alpha-aminoadipic semialdehyde dehydrogenase	ALDH7A1		536;554;539;479;521;545;472;499;294;239;348;136;193;164;41;77;97
0.124813	0	-0.801371	-0.757191	-1.36302	-0.758244	0.656275	0.942282	0.902256	0.335539	(S)-2-(5-amino-1-(5-phospho-D-ribosyl)imidazole-4-carboxamido)succinate AMP-lyase (fumarate-forming) activity;amidine-lyase activity;carbon-nitrogen lyase activity;catalytic activity;lyase activity;N6-(1,2-dicarboxyethyl)AMP AMP-lyase (fumarate-forming) activity	biosynthetic process;cellular aromatic compound metabolic process;cellular component assembly;cellular component organization;cellular metabolic process;cellular nitrogen compound metabolic process;cellular process;cellular respiration;generation of precursor metabolites and energy;heterocycle metabolic process;macromolecular complex assembly;metabolic process;nitrogen compound metabolic process;…	cell part;cytosol;intracellular membrane-bounded organelle;intracellular organelle;mitochondrion;organelle	Alanine, aspartate and glutamate metabolism;Purine metabolism	ADSL_C	18	18	18	54	54	54	54.465	0	323.31	2854000000	102	11	10	11	4	2	11	7	12	8	11	15	A0A1B0GWJ0;A0A1B0GTJ7;P30566;A0A0A6YY92;A0A1B0GWF8;A0A1B0GTG9;A0A096LNY6;A0A096LNY5;A0A096LNY4;B4DEP1;A0A096LP72;A0A1W2PRX2;A0A096LP92;A0A096LP76;A0A096LPA2;V9GY96;A0A096LNT0	A0A1B0GWJ0;A0A1B0GTJ7;P30566;A0A0A6YY92;A0A1B0GWF8;A0A1B0GTG9;A0A096LNY6;A0A096LNY5	Adenylosuccinate lyase	ADSL		480;480;484;498;403;377;360;262;164;127;149;142;78;102;133;57;81
-0.748258	-0.544262	-0.449375	0.341858	0.371357	-2.23602	-0.748142	-0.776129	-0.745811	-0.651489	binding;cation binding;DNA binding;ion binding;metal ion binding;nucleic acid binding;RNA binding;transition metal ion binding;zinc ion binding	biological regulation;catabolic process;cellular metabolic process;cellular nitrogen compound metabolic process;cellular process;macromolecule metabolic process;metabolic process;nitrogen compound metabolic process;nucleobase-containing compound metabolic process;primary metabolic process;RNA catabolic process;RNA metabolic process;RNA processing	cell part;cytoplasm;intracellular membrane-bounded organelle;intracellular non-membrane-bounded organelle;intracellular organelle;mitochondrion;nucleolus;nucleoplasm;nucleus;organelle		CSP;ZnF_C2HC	4	4	4	31.1	31.1	31.1	23.006	0	10.016	145040000	11	1	1	2	3	0	0	0	0	1	1	2	A0A1B0GTK2;A0A1B0GVD3;Q6ZN17	A0A1B0GTK2;A0A1B0GVD3;Q6ZN17	Protein lin-28 homolog B	LIN28B		209;258;250
0.348228	-0.0416374	-0.157036	-0.504204	-0.469366	-2.40188	0.38563	0.301027	0.0746078	0.0416374	binding;cytoskeletal protein binding;kinesin binding;protein binding	anatomical structure development;cell differentiation;cellular process;developmental process;establishment of localization;transport	cell part;cytoskeleton;intracellular membrane-bounded organelle;intracellular non-membrane-bounded organelle;intracellular organelle;mitochondrion;organelle			5	5	5	17	17	17	74.783	0	14.232	352910000	18	2	1	2	2	0	2	1	1	2	3	2	A0A1B0GUA3;Q96EK5;A0A1B0GUH6;A0A0D9SFK7;A0A1B0GTE6;A0A1B0GU96;A0A1B0GV79;A0A1B0GVY9;A0A1B0GW21	A0A1B0GUA3;Q96EK5;A0A1B0GUH6;A0A0D9SFK7	KIF1-binding protein	KIAA1279;KIF1BP		646;621;342;297;267;101;169;189;209
0.131493	-0.698034	-0.0299854	-0.783256	-0.687845	-2.39435	-0.836562	-0.921857	-0.881773	0.0299854	acid-amino acid ligase activity;binding;catalytic activity;cation binding;ion binding;ligase activity;ligase activity, forming carbon-nitrogen bonds;metal ion binding;protein binding transcription factor activity;small conjugating protein ligase activity;transcription coactivator activity;transcription cofactor activity;transcription factor binding transcription factor activity;ubiquitin-protein …	anatomical structure development;biological regulation;catabolic process;cellular component organization;cellular membrane organization;cellular metabolic process;cellular process;developmental process;endocytosis;establishment of localization;growth;macromolecule metabolic process;macromolecule modification;membrane invagination;membrane organization;metabolic process;primary metabolic process;p…	cell part;cytoplasm;cytosol;intracellular membrane-bounded organelle;intracellular organelle;macromolecular complex;nucleus;organelle;proteasome complex;protein complex	Ubiquitin mediated proteolysis	HECTc	5	5	5	10.2	10.2	10.2	93.543	0	42.26	65898000	12	3	1	0	0	0	2	0	1	1	2	2	A0A1B0GVL3;Q05086;A0A0D9SG77;A0A0D9SG63;S4R306;A0A0D9SF91;A0A0D9SGI3	A0A1B0GVL3;Q05086;A0A0D9SG77	Ubiquitin-protein ligase E3A	UBE3A		813;875;765;143;189;187;237
-0.0854607	0.0924854	-0.143385	-0.302534	-0.707697	0.412399	0.00679398	0.0655003	0.015583	0	catalytic activity;dihydropyrimidinase activity;hydrolase activity;hydrolase activity, acting on carbon-nitrogen (but not peptide) bonds;hydrolase activity, acting on carbon-nitrogen (but not peptide) bonds, in cyclic amides	anatomical structure development;biological regulation;cellular component organization;cellular membrane organization;cellular metabolic process;cellular nitrogen compound metabolic process;cellular process;cytoskeleton organization;developmental process;endocytosis;establishment of localization;locomotion;membrane invagination;membrane organization;metabolic process;nitrogen compound metabolic p…	cell body;cell part;cell projection;cytoskeleton;cytosol;extracellular organelle;intracellular membrane-bounded organelle;intracellular non-membrane-bounded organelle;intracellular organelle;macromolecular complex;membrane;mitochondrion;neuron projection;neuronal cell body;organelle;protein complex;site of polarized growth;vesicle	Axon guidance		18	18	16	40.8	40.8	37.2	73.502	0	83.179	1172500000	114	11	13	12	11	3	9	7	9	10	15	14	A0A1C7CYX9;Q16555	A0A1C7CYX9;Q16555	Dihydropyrimidinase-related protein 2	DPYSL2		677;572
0.310624	-1.31921	-0.150079	0.786901	-0.199363	-1.99869	0.567605	-0.163461	0.0440245	-0.0440245	catalytic activity;transferase activity	biosynthetic process;cellular lipid metabolic process;cellular metabolic process;cellular process;lipid metabolic process;macromolecule metabolic process;macromolecule modification;metabolic process;primary metabolic process;protein lipidation;protein metabolic process;protein modification process	cell part;membrane	Glycosylphosphatidylinositol(GPI)-anchor biosynthesis		1	1	1	4.3	4.3	4.3	42.739	0.0011412	3.095	387350000	8	1	1	2	0	0	1	1	0	0	1	1	A0A1W2PRH3;K7EPJ2;K7EMD7;K7ELE1;A0A1W2PNW5;A0A1W2PPB6;A0A1W2PR74;A0A1W2PPR7;A0A1W2PQZ1;A0A1W2PNQ8;A0A1W2PQR8;A0A1W2PQP4;A0A1W2PNR0;A0A1W2PNH8;A0A1W2PS19;A0A1W2PQA9;O95427	A0A1W2PRH3;K7EPJ2;K7EMD7;K7ELE1;A0A1W2PNW5;A0A1W2PPB6;A0A1W2PR74;A0A1W2PPR7;A0A1W2PQZ1;A0A1W2PNQ8;A0A1W2PQR8;A0A1W2PQP4;A0A1W2PNR0;A0A1W2PNH8;A0A1W2PS19;A0A1W2PQA9;O95427	GPI ethanolamine phosphate transferase 1	PIGN	2	375;391;395;490;621;738;751;797;798;847;854;870;897;911;936;970;931
-0.0789394	0.0337162	-0.0337162	0.048584	1.54934	0.394115	-0.219048	-0.271019	-0.627129	-0.0613918	catalytic activity;cation channel activity;cation transmembrane transporter activity;channel activity;delayed rectifier potassium channel activity;gated channel activity;ion channel activity;ion transmembrane transporter activity;kinase activity;molecular transducer activity;passive transmembrane transporter activity;phosphotransferase activity, alcohol group as acceptor;phosphotransferase activi…	anatomical structure formation involved in morphogenesis;biological regulation;cell communication;cell-cell signaling;cellular homeostasis;cellular ion homeostasis;cellular process;developmental process;establishment of localization;homeostatic process;ion transport;regulation of cell cycle;regulation of mitotic cell cycle;signaling;syncytium formation;transmembrane transport;transport	cell part;cell surface;cytoplasm;intracellular;macromolecular complex;membrane;nucleoplasm;plasma membrane;protein complex		cNMP;PAC;PAS	3	3	3	3.9	3.9	3.9	102.83	0.00058497	3.4527	242540000	4	0	0	1	2	0	0	0	0	1	0	0	A0A1X7SBS6;A0A1W2PNI2;O95259;A0A1W2PRV9;A0A1W2PS62;A0A1W2PP68;A0A0S1TJ81;A0A1W2PRG6;A0A1W2PPA2;Q8NCM2	A0A1X7SBS6;A0A1W2PNI2;O95259;A0A1W2PRV9;A0A1W2PS62;A0A1W2PP68;A0A0S1TJ81;A0A1W2PRG6;A0A1W2PPA2	Potassium voltage-gated channel subfamily H member 1	KCNH1		913;940;989;327;333;354;454;482;605;988
-0.17441	-0.0306435	-0.742819	0.584639	0.235006	-2.29823	0.45179	-0.935972	-0.863787	0.0306435	catalytic activity;GPI-anchor transamidase activity;hydrolase activity	cell death;cell differentiation;cellular metabolic process;cellular process;death;developmental process;macromolecule metabolic process;macromolecule modification;metabolic process;primary metabolic process;protein lipidation;protein metabolic process;protein modification process	cell part;cytoplasmic membrane-bounded vesicle;intracellular membrane-bounded organelle;intracellular organelle;macromolecular complex;membrane;organelle;protein complex;vesicle	Glycosylphosphatidylinositol(GPI)-anchor biosynthesis		3	3	3	10.2	10.2	10.2	44.63	0	11.54	71059000	12	0	0	3	2	0	2	0	1	2	0	2	A0A1W2PPQ7;A0A1W2PRZ8;A0A1W2PP57;A0A1W2PPC3;A0A1W2PPS0;A0A1W2PPR6;A0A1W2PNP0;Q969N2;A0A1W2PQ29;A0A1W2PPI8;A0A1W2PRH2;A0A1W2PQ52;A0A1W2PQN1;A0A1W2PP13;F6W983;A0A1W2PR92;A0A1W2PP53;A0A1W2PP91;A0A1W2PR22;B7Z7C5;A0A1W2PP03;A0A1W2PSC5;A0A1W2PNZ5;A0A1W2PPK4;A0A1W2PNS2;A0A1W2PP98;A0A1W2PQL3;A0A1W2PRH8;A0A1W2PQY1;A0A1W2PRG1;A0A1W2PNW9;A0A1W2PPU8;H7C2Y2;A0A1W2PRV7	A0A1W2PPQ7;A0A1W2PRZ8;A0A1W2PP57;A0A1W2PPC3;A0A1W2PPS0;A0A1W2PPR6;A0A1W2PNP0;Q969N2;A0A1W2PQ29;A0A1W2PPI8;A0A1W2PRH2;A0A1W2PQ52;A0A1W2PQN1;A0A1W2PP13;F6W983;A0A1W2PR92;A0A1W2PP53	GPI transamidase component PIG-T	PIGT	1	393;429;495;499;505;532;580;578;300;314;316;318;329;354;384;432;441;77;116;123;128;128;140;144;183;191;198;203;213;232;240;242;275;331
0.0317326	0.248941	-0.393681	-0.0461998	0.1684	-1.18472	-0.0304623	0.0590611	0	-0.0958233						15	15	0	34.9	34.9	0	75.872	0	59.82	1725100000	67	6	6	9	6	1	6	5	6	7	8	7	A0A1W2PNV4	A0A1W2PNV4				684
-0.288094	-0.405846	-0.327974	-0.397675	-0.800436	0.219372	0.122557	0.307459	0.362217	0		anatomical structure development;cell differentiation;cellular metabolic process;cellular process;developmental process;macromolecule metabolic process;metabolic process;primary metabolic process;protein folding;protein metabolic process	cell part;cytoplasm;Golgi apparatus;intracellular membrane-bounded organelle;intracellular organelle;nucleoplasm;organelle		TPR	19	19	19	26.8	26.8	26.8	118.39	0	126.29	756620000	95	8	10	13	5	2	10	5	5	11	16	10	A0A1W2PNX8;Q9H3U1	A0A1W2PNX8;Q9H3U1	Protein unc-45 homolog A	UNC45A		1084;944
0.0277977	0	-0.0211086	-0.307007	-0.384359	0.174652	0.193293	0.144938	0.12323	-0.329212	binding;carbon-carbon lyase activity;carboxy-lyase activity;catalytic activity;cation binding;coenzyme binding;cofactor binding;electron carrier activity;ion binding;lyase activity;malate dehydrogenase (decarboxylating) activity;malate dehydrogenase activity;malic enzyme activity;metal ion binding;NAD binding;nucleotide binding;oxaloacetate decarboxylase activity;oxidoreductase activity;oxidoredu…	cellular ketone metabolic process;cellular metabolic process;cellular process;metabolic process;organic acid metabolic process;small molecule metabolic process	cell part;intracellular membrane-bounded organelle;intracellular organelle;mitochondrion;organelle	Pyruvate metabolism;Two-component system	Malic_M	15	15	15	46	46	46	61.221	0	147.54	1243000000	66	7	6	7	8	2	7	3	3	6	4	13	A0A1W2PPH1;A0A1W2PQH3;P23368;A0A1W2PQT3;A0A1W2PQY8;A0A1W2PR68;A0A1W2PQ37;A0A1W2PQF8;A0A1W2PRS2;A0A1W2PRY9;A0A1W2PQH4;A0A1W2PPY2;A0A1W2PRH1	A0A1W2PPH1;A0A1W2PQH3;P23368;A0A1W2PQT3;A0A1W2PQY8;A0A1W2PR68;A0A1W2PQ37;A0A1W2PQF8	NAD-dependent malic enzyme, mitochondrial	ME2		546;547;584;536;565;530;443;480;132;133;133;55;83
-0.193993	0.31842	0	-0.398685	-0.455208	0.230385	0.0115719	0.0138626	0.30262	-0.0487156	binding;cation binding;DNA binding;ion binding;metal ion binding;nucleic acid binding;RNA binding;transition metal ion binding;translation elongation factor activity;translation factor activity, nucleic acid binding;zinc ion binding	biological regulation;biosynthetic process;cell differentiation;cellular metabolic process;cellular nitrogen compound metabolic process;cellular process;developmental process;DNA metabolic process;DNA repair;macromolecule metabolic process;metabolic process;nitrogen compound metabolic process;nucleobase-containing compound metabolic process;primary metabolic process;response to DNA damage stimulu…	cell part;centrosome;intracellular membrane-bounded organelle;intracellular non-membrane-bounded organelle;intracellular organelle;macromolecular complex;microtubule organizing center;nucleolus;nucleoplasm;nucleus;organelle;protein complex;transcription elongation factor complex		TFS2M;TFS2N;ZnF_C2C2	7	7	7	31.9	31.9	31.9	33.935	0	32.688	290820000	17	3	2	1	1	1	1	2	2	2	1	1	A0A1W2PPZ5;P23193;A0A1W2PRL9;B7Z4S1;E5RJ93;E5RIS7;A0A0A0MT58;Q15560;E5RK46;A0A1W2PS15;E5RFI1;A0A1W2PPV7;Q5JRI7	A0A1W2PPZ5;P23193;A0A1W2PRL9	Transcription elongation factor A protein 1	TCEA1		301;301;280;117;90;111;270;299;45;45;47;47;246
-0.385326	-0.12007	0.249525	0.324551	0.563152	1.22256	-0.132462	0.216211	0	-0.0338688	adenyl nucleotide binding;adenyl ribonucleotide binding;ATP binding;ATPase activity;ATPase activity, coupled;ATP-dependent helicase activity;ATP-dependent RNA helicase activity;binding;catalytic activity;estrogen receptor binding;helicase activity;hormone receptor binding;hydrolase activity;hydrolase activity, acting on acid anhydrides;hydrolase activity, acting on acid anhydrides, in phosphorus-…	biological regulation;biosynthetic process;cellular metabolic process;cellular nitrogen compound metabolic process;cellular process;macromolecule metabolic process;metabolic process;mRNA metabolic process;mRNA processing;nitrogen compound metabolic process;nucleobase-containing compound metabolic process;primary metabolic process;RNA metabolic process;RNA processing;RNA splicing	cell part;cytoplasm;intracellular membrane-bounded organelle;intracellular non-membrane-bounded organelle;intracellular organelle;membrane;nucleolus;nucleoplasm;nucleus;organelle		DEXDc;HELICc	30	22	22	43.5	35.9	35.9	80.253	0	323.31	6784200000	170	11	23	16	17	14	18	14	12	15	13	17	A0A1X7SBZ2;A0A1W2PQ51;Q92841;A0A0U1RQJ0	A0A1X7SBZ2;A0A1W2PQ51;Q92841	Probable ATP-dependent RNA helicase DDX17	DDX17		729;731;729;56
-0.272027	0.0679598	-0.0679598	0.113955	-0.165166	-2.69475	-0.711402	-0.757303	-0.671929	-0.595931	amine binding;amino acid binding;binding;carboxylic acid binding;catalytic activity;coenzyme binding;cofactor binding;flavin adenine dinucleotide binding;methylenetetrahydrofolate reductase (NADPH) activity;modified amino acid binding;NADP binding;nucleotide binding;oxidoreductase activity;oxidoreductase activity, acting on the CH-NH group of donors;oxidoreductase activity, acting on the CH-NH gr…	amine metabolic process;biological regulation;biosynthetic process;blood circulation;cellular amino acid metabolic process;cellular aromatic compound metabolic process;cellular component organization;cellular ketone metabolic process;cellular metabolic process;cellular nitrogen compound metabolic process;cellular process;chromatin organization;chromosome organization;circulatory system process;co…	cell part;cell projection;cytosol;neuron projection	Carbon fixation pathways in prokaryotes;Methane metabolism;One carbon pool by folate		3	3	3	10.6	10.6	10.6	62	0	11.633	61684000	11	1	2	2	3	0	0	0	0	0	0	3	A0A286YF17;A0A286YFD0;P42898;F8W9T8;A0A286YF47;Q5SNW5;Q5SNW7;L7P8G6	A0A286YF17;A0A286YFD0;P42898;F8W9T8	Methylenetetrahydrofolate reductase	MTHFR		549;642;656;229;82;143;155;411
0.075819	0.153784	0.0685463	0.0413685	-0.300255	-0.772902	-0.409653	0.108391	-0.0133324	-0.0497322	binding;catalytic activity;coenzyme binding;cofactor binding;electron carrier activity;NAD binding;nucleotide binding;oxidoreductase activity;oxidoreductase activity, acting on CH-OH group of donors;oxidoreductase activity, acting on the CH-OH group of donors, NAD or NADP as acceptor;phosphoglycerate dehydrogenase activity	amine metabolic process;anatomical structure development;biological regulation;biosynthetic process;cell development;cellular amino acid metabolic process;cellular component organization;cellular ketone metabolic process;cellular metabolic process;cellular nitrogen compound metabolic process;cellular process;developmental process;metabolic process;nitrogen compound metabolic process;organic acid …	cell part;cytosol;extracellular organelle;organelle;vesicle	Glycine, serine and threonine metabolism;Methane metabolism		29	29	29	59.3	59.3	59.3	55.938	0	323.31	21753000000	294	37	32	31	26	8	24	22	18	29	28	39	A0A286YF22;O43175;A0A2C9F2M7;A0A286YFA2;A0A286YFL2;A0A286YFM8;A0A286YFC8;A0A286YFB2;A0A286YER3;A0A286YF34;A0A286YF78;A0A286YFF3;A0A286YFK5;A0A286YFE1	A0A286YF22;O43175;A0A2C9F2M7;A0A286YFA2;A0A286YFL2;A0A286YFM8	D-3-phosphoglycerate dehydrogenase	PHGDH		526;533;532;445;429;239;123;165;97;72;276;63;145;89
0.217222	0.128422	0.2789	-0.379782	-0.684618	-1.80235	-0.679595	-0.0347233	0.0050621	-0.458782	binding;catalytic activity;cation binding;ion binding;metal ion binding;oxidoreductase activity;oxidoreductase activity, acting on CH or CH2 groups;oxidoreductase activity, acting on CH or CH2 groups, disulfide as acceptor;ribonucleoside-diphosphate reductase activity	biological regulation;biosynthetic process;cell cycle;cellular component assembly;cellular component organization;cellular metabolic process;cellular nitrogen compound metabolic process;cellular process;DNA metabolic process;DNA replication;macromolecular complex assembly;macromolecule metabolic process;metabolic process;mitotic cell cycle;nitrogen compound metabolic process;nucleobase-containing…	cell part;cytoplasm;cytosol;intracellular membrane-bounded organelle;intracellular organelle;nucleoplasm;nucleus;organelle	Glutathione metabolism;p53 signaling pathway;Purine metabolism;Pyrimidine metabolism		6	6	6	26.7	26.7	26.7	42.906	0	25.773	232050000	27	6	4	2	2	0	0	3	2	1	4	3	A0A286YFD6;P31350;C9JXC1	A0A286YFD6;P31350;C9JXC1	Ribonucleoside-diphosphate reductase subunit M2	RRM2		374;389;289
0	-0.482281	-0.0800972	-0.250349	-0.444534	1.14978	0.532595	0.283609	0.207924	0.069521	ARF guanyl-nucleotide exchange factor activity;enzyme regulator activity;GTPase regulator activity;guanyl-nucleotide exchange factor activity;nucleoside-triphosphatase regulator activity;small GTPase regulator activity	biological regulation;cellular component organization;cellular process;cytoskeleton organization;endosome transport;establishment of localization;Golgi vesicle transport;organelle organization;protein transport;transport;vesicle-mediated transport	cell part;extracellular organelle;organelle;vesicle			18	18	18	12.8	12.8	12.8	190.48	0	62.609	703080000	65	5	7	8	4	5	6	6	5	4	7	8	A0A286YFF8;Q7Z3U7;F8VZV1	A0A286YFF8;Q7Z3U7	Protein MON2 homolog	MON2		1718;1717;1072
-0.65867	0.00314808	-0.123338	-0.00314808	-0.719801	-2.42493	0.0109987	-0.932165	-0.893462	-0.617906	adenyl nucleotide binding;adenyl ribonucleotide binding;aminoacyl-tRNA ligase activity;ATP binding;binding;catalytic activity;histidine-tRNA ligase activity;ligase activity;ligase activity, forming aminoacyl-tRNA and related compounds;ligase activity, forming carbon-oxygen bonds;nucleotide binding;purine nucleotide binding;purine ribonucleoside triphosphate binding;purine ribonucleotide binding;r…	amine metabolic process;biosynthetic process;cellular amino acid metabolic process;cellular ketone metabolic process;cellular metabolic process;cellular nitrogen compound metabolic process;cellular process;macromolecule metabolic process;metabolic process;nitrogen compound metabolic process;nucleobase-containing compound metabolic process;organic acid metabolic process;primary metabolic process;p…	cell part;cytoplasm;intracellular membrane-bounded organelle;intracellular organelle;mitochondrion;organelle	Aminoacyl-tRNA biosynthesis		10	4	4	28.9	15.4	15.4	49.246	0	17.778	69846000	9	1	2	0	1	0	3	0	0	0	0	2	A0A2R8Y6I1;A0A2R8Y3N3;A0A2R8Y5P7;P49590;B4DQ67;D6RB22;D6RJE6	A0A2R8Y6I1;A0A2R8Y3N3;A0A2R8Y5P7;P49590;B4DQ67;D6RB22;D6RJE6	Probable histidine--tRNA ligase, mitochondrial	HARS2		436;473;512;506;334;399;293
0.0555534	0	0.0294456	-0.0229721	0.246525	0.329126	-0.333994	-0.174667	-0.194357	-0.0417728	binding;catalytic activity;cation binding;GTP binding;GTPase activity;guanyl nucleotide binding;guanyl ribonucleotide binding;hydrolase activity;hydrolase activity, acting on acid anhydrides;hydrolase activity, acting on acid anhydrides, in phosphorus-containing anhydrides;ion binding;magnesium ion binding;metal ion binding;nucleoside-triphosphatase activity;nucleotide binding;purine nucleotide b…	aging;anatomical structure formation involved in morphogenesis;biological regulation;cell death;cellular component movement;cellular component organization;cellular membrane organization;cellular process;cytoskeleton-dependent intracellular transport;death;developmental process;establishment of localization;membrane fusion;membrane organization;metabolic process;mitochondrion organization;multice…	cell part;cell projection;cytoplasm;intracellular membrane-bounded organelle;intracellular organelle;membrane;mitochondrion;neuron projection;nucleoplasm;organelle		DYNc	17	17	17	29.4	29.4	29.4	99.132	0	165.71	1276300000	81	8	10	9	10	2	5	5	3	6	12	11	A0A2R8Y3X5;A0A2R8YDM2;O60313;A0A2R8YE78;C9JMB8;E5KLJ9;A0A2R8YFD1;A0A2R8YGE5;A0A2R8YD53;A0A2R8Y4Q3;A0A2R8Y4G4;A0A2R8YE54;H7C141;C9JY58;H7C321;A0A2R8Y5E2;A0A2R8Y5G3	A0A2R8Y3X5;A0A2R8YDM2;O60313;A0A2R8YE78;C9JMB8;E5KLJ9;A0A2R8YFD1;A0A2R8YGE5	Dynamin-like 120 kDa protein, mitochondrial;Dynamin-like 120 kDa protein, form S1	OPA1		854;965;960;963;972;979;623;664;569;412;377;528;183;84;85;170;209
0.022974	0.0202045	-0.470873	0.1264	-0.343924	-2.65624	0	0.00140381	-0.177269	-0.73114	active transmembrane transporter activity;adenyl nucleotide binding;adenyl ribonucleotide binding;ATP binding;ATPase activity;ATPase activity, coupled;ATPase activity, coupled to movement of substances;ATPase activity, coupled to transmembrane movement of substances;binding;catalytic activity;cofactor transporter activity;heme transporter activity;hydrolase activity;hydrolase activity, acting on …	biological regulation;cellular homeostasis;cellular ion homeostasis;cellular process;cofactor transport;establishment of localization;homeostatic process;metabolic process;small molecule metabolic process;transmembrane transport;transport	cell part;intracellular membrane-bounded organelle;intracellular organelle;membrane;mitochondrion;organelle	ABC transporters	AAA	6	6	6	17.1	17.1	17.1	71.169	0	22.976	108050000	17	4	2	3	1	0	1	0	0	1	1	4	A0A2R8Y473;B4DGL8;O75027;A0A087WW65;A0A2R8Y3N2;E9PNQ5;E9PJR8	A0A2R8Y473;B4DGL8;O75027;A0A087WW65	ATP-binding cassette sub-family B member 7, mitochondrial	ABCB7		651;702;752;713;159;171;188
0.252666	0.308925	0.0348597	-0.0324392	-0.0343218	-2.09146	-0.370542	-0.672912	0.0324392	-0.403386		anatomical structure development;anatomical structure formation involved in morphogenesis;biological adhesion;biological regulation;cell activation;cell adhesion;cell development;cell junction organization;cellular component assembly;cellular component movement;cellular component organization;cellular membrane organization;cellular process;coagulation;developmental process;establishment of locali…	cell part;extracellular organelle;extracellular space;membrane;organelle;plasma membrane;vesicle	Hematopoietic cell lineage		6	6	6	36.5	36.5	36.5	17.764	0	92.939	1098600000	41	5	3	5	5	0	3	2	2	4	5	7	A6NNI4;A0A2R8Y478;G8JLH6;P21926;A0A087WU13	A6NNI4;A0A2R8Y478;G8JLH6;P21926;A0A087WU13	Tetraspanin;CD9 antigen	CD9		159;159;251;228;182
0.137077	0.159643	-0.424	-0.172398	-0.340193	-2.054	0.136837	0.106079	-0.256124	-0.106079	enzyme activator activity;enzyme regulator activity;GTPase activator activity;GTPase regulator activity;nucleoside-triphosphatase regulator activity	cellular component organization;cellular process	cell part;cytoplasm;synapse		TBC;TLDc	7	7	7	24.6	24.6	24.6	51.956	0	30.673	256420000	22	3	2	4	2	0	3	0	0	1	4	3	H3BV07;A0A2R8Y518;H3BNU1;Q9ULP9;A0A0D9SFR5;H3BQ06;H3BTP5	H3BV07;A0A2R8Y518;H3BNU1;Q9ULP9	TBC1 domain family member 24	TBC1D24		455;465;553;559;339;376;69
0.26461	0	0.0555439	0.307247	0.445719	-2.32275	-0.181574	-0.0628166	-0.268171	-0.312582	activating transcription factor binding;alpha-catenin binding;androgen receptor binding;binding;cadherin binding;cell adhesion molecule binding;DNA binding;double-stranded DNA binding;enzyme binding;estrogen receptor binding;hormone receptor binding;ion channel binding;I-SMAD binding;kinase binding;molecular transducer activity;nuclear hormone receptor binding;nucleic acid binding;nucleic acid bi…	anatomical structure development;anatomical structure formation involved in morphogenesis;anatomical structure morphogenesis;biological adhesion;biological regulation;biosynthetic process;cell activation;cell adhesion;cell communication;cell death;cell development;cell differentiation;cell junction organization;cell maturation;cell morphogenesis;cell motility;cell proliferation;cell-cell signalin…	apical part of cell;cell cortex;cell part;cell projection;centrosome;cytoplasm;cytosol;extracellular organelle;intracellular membrane-bounded organelle;intracellular non-membrane-bounded organelle;intracellular organelle;macromolecular complex;membrane;microtubule organizing center;nucleoplasm;nucleus;organelle;plasma membrane;protein complex;synapse;transcription factor complex;vesicle	Adherens junction;Arrhythmogenic right ventricular cardiomyopathy (ARVC);Bacterial invasion of epithelial cells;Basal cell carcinoma;Colorectal cancer;Endometrial cancer;Focal adhesion;Leukocyte transendothelial migration;Melanogenesis;Pathogenic Escherichia coli infection;Pathways in cancer;Prostate cancer;Thyroid cancer;Tight junction;Wnt signaling pathway	ARM	21	16	16	39.6	33.6	33.6	77.206	0	234.41	3870000000	117	12	14	17	13	1	10	4	11	7	13	15	A0A2R8Y804;A0A2R8Y543;A0A2R8Y5C3;A0A2R8Y750;B4DGU4;A0A2R8YCH5;A0A2R8Y5A3;P35222;A0A2R8Y7Z0;A0A2R8Y5Z1;A0A2R8Y6G0;A0A2R8Y815;C9IZ65;E9PDF9;E7EV28;A0A2R8YG06;E7EMJ5	A0A2R8Y804;A0A2R8Y543;A0A2R8Y5C3;A0A2R8Y750;B4DGU4;A0A2R8YCH5;A0A2R8Y5A3;P35222;A0A2R8Y7Z0;A0A2R8Y5Z1;A0A2R8Y6G0	Catenin beta-1	CTNNB1		702;715;737;744;774;779;783;781;780;752;367;186;59;100;108;146;149
0.170948	0.390951	-0.0133171	-0.416754	-0.654675	-2.79755	0.0119934	0.32111	-0.356672	-0.0119934	binding;chaperone binding;protein binding	anatomical structure morphogenesis;behavior;cellular component morphogenesis;cellular component organization;cellular metabolic process;cellular process;cytoskeleton organization;developmental process;growth;macromolecule metabolic process;metabolic process;multicellular organismal process;muscle adaptation;organelle organization;post-embryonic development;primary metabolic process;protein foldin…	cell part;cytoplasm;macromolecular complex;protein complex		CAP_GLY	12	12	11	31.7	31.7	30.4	61.81	0	39.232	181520000	29	4	3	4	1	0	3	1	1	3	6	3	A0A2R8Y5Q8;Q15813;A0A2R8Y7E7;A0A2R8YHI9;A0A2R8Y6Q1;A0A2U3TZJ6;A0A2R8YFL4;A0A2R8Y4V6;A0A2R8YER9;A0A2R8Y809;A0A2R8Y784;A0A2R8Y897;A0A2R8Y6L2;A0A2R8YFM3;A0A2R8Y5H6;A0A2R8Y787;A0A2R8Y6G3;A0A2R8Y4P2;A0A2R8Y4E7;A0A2R8YF12;A0A2R8Y7H8	A0A2R8Y5Q8;Q15813;A0A2R8Y7E7;A0A2R8YHI9;A0A2R8Y6Q1;A0A2U3TZJ6;A0A2R8YFL4;A0A2R8Y4V6	Tubulin-specific chaperone E	TBCE		549;527;487;520;414;464;370;252;235;311;217;110;134;248;127;139;159;160;175;61;116
0.06633	0.189161	-0.06633	0.227257	0.249168	-2.22823	-0.622162	-0.583324	-0.760061	-0.543333		anatomical structure development;biological regulation;cell development;cellular component assembly;cellular component organization;cellular process;developmental process;localization;regulation of organelle organization	apical part of cell;cell part;cell projection;cytoplasm;cytoskeleton;extracellular organelle;extracellular space;filopodium;intracellular non-membrane-bounded organelle;intracellular organelle;membrane;microvillus;organelle;plasma membrane;vesicle	Regulation of actin cytoskeleton	B41	17	7	7	36.5	21.9	21.9	62.93	0	25.196	176220000	22	2	4	4	1	0	3	0	0	1	5	2	A0A2R8Y7M3;A0A2R8Y5S7;P35241;E9PNV3;E9PQ82;A0A2R8Y5P0;E9PKN5;A0A2R8Y4H6	A0A2R8Y7M3;A0A2R8Y5S7;P35241	Radixin	RDX		534;590;583;148;116;115;51;152
-0.390169	-0.178392	-0.29427	0	0.166945	0.763189	-0.137434	0.210646	0.390434	0.329374	5S rRNA binding;binding;nucleic acid binding;RNA binding;rRNA binding;structural constituent of ribosome;structural molecule activity	biosynthetic process;catabolic process;cellular component disassembly;cellular component organization;cellular metabolic process;cellular nitrogen compound metabolic process;cellular process;establishment of localization;macromolecule metabolic process;metabolic process;mRNA metabolic process;nitrogen compound metabolic process;nucleobase-containing compound metabolic process;primary metabolic pr…	cell part;cytoplasm;cytosol;extracellular organelle;intracellular membrane-bounded organelle;intracellular non-membrane-bounded organelle;intracellular organelle;macromolecular complex;membrane;nucleolus;nucleus;organelle;ribonucleoprotein complex;ribosome;vesicle	Ribosome		14	14	14	61.8	61.8	61.8	27.045	0	116.08	3283700000	81	6	6	6	5	10	8	7	7	10	5	11	A0A2R8Y6J3;P46777;Q5T7N0;A0A2R8Y4A2	A0A2R8Y6J3;P46777	60S ribosomal protein L5	RPL5		238;297;130;170
0.57413	0.354312	-0.805171	-1.01492	-1.33423	-2.32619	0.897038	1.09153	0.735085	-0.354312	acid-thiol ligase activity;adenyl nucleotide binding;adenyl ribonucleotide binding;ATP binding;binding;catalytic activity;cation binding;CoA-ligase activity;ion binding;ligase activity;ligase activity, forming carbon-sulfur bonds;metal ion binding;nucleotide binding;purine nucleotide binding;purine ribonucleoside triphosphate binding;purine ribonucleotide binding;ribonucleotide binding;succinate-…	biosynthetic process;catabolic process;cellular ketone metabolic process;cellular metabolic process;cellular nitrogen compound metabolic process;cellular process;cofactor metabolic process;heterocycle metabolic process;metabolic process;nitrogen compound metabolic process;organic acid metabolic process;small molecule metabolic process	cell part;extracellular organelle;intracellular membrane-bounded organelle;intracellular organelle;mitochondrion;organelle;vesicle	Citrate cycle (TCA cycle);Propanoate metabolism		4	4	4	8.5	8.5	8.5	52.611	0	19.586	317210000	22	2	1	2	1	1	2	4	3	1	2	3	A0A2R8Y6Y7;Q9P2R7;A0A2R8YDQ9;A0A0U1RQL1;Q5T9Q8;A0A0U1RQU7;A0A2R8Y5P4;A0A0U1RQF8;A0A2R8Y5P6;A0A2R8Y6E6;Q5T9Q5	A0A2R8Y6Y7;Q9P2R7;A0A2R8YDQ9;A0A0U1RQL1;Q5T9Q8	Succinyl-CoA ligase [ADP-forming] subunit beta, mitochondrial	SUCLA2		484;463;405;80;154;136;159;191;221;224;298
-0.812992	-0.458231	-0.137945	0	0.215494	1.22736	-0.0559044	0.322254	0.265316	0.457359	binding;mRNA 5'-UTR binding;mRNA binding;nucleic acid binding;RNA binding;structural constituent of ribosome;structural molecule activity;translation regulator activity	biological regulation;biosynthetic process;catabolic process;cell differentiation;cellular component assembly;cellular component disassembly;cellular component organization;cellular macromolecular complex assembly;cellular metabolic process;cellular nitrogen compound metabolic process;cellular process;developmental process;establishment of localization;macromolecular complex assembly;macromolecul…	cell part;cytoplasm;cytosol;extracellular organelle;intracellular membrane-bounded organelle;intracellular non-membrane-bounded organelle;intracellular organelle;macromolecular complex;membrane;mitochondrion;nucleolus;organelle;ribonucleoprotein complex;ribosome;small ribosomal subunit;vesicle	Ribosome		11	11	11	43.3	43.3	43.3	16.159	0	106.13	5331700000	136	10	15	16	16	11	10	11	11	12	13	11	A0A2R8Y811;P62263;E5RH77	A0A2R8Y811;P62263;E5RH77	40S ribosomal protein S14	RPS14		150;151;134
-0.327177	0	-0.0649338	-0.174349	-0.208181	1.30056	-0.256224	0.019083	0.35965	0.196224	6-phosphofructokinase activity;adenyl nucleotide binding;adenyl ribonucleotide binding;ATP binding;binding;carbohydrate binding;carbohydrate kinase activity;catalytic activity;cation binding;enzyme binding;fructose binding;identical protein binding;ion binding;kinase activity;kinase binding;metal ion binding;monosaccharide binding;nucleotide binding;phosphofructokinase activity;phosphotransferase…	alcohol metabolic process;biological regulation;carbohydrate metabolic process;catabolic process;cellular component assembly;cellular component organization;cellular homeostasis;cellular metabolic process;cellular process;generation of precursor metabolites and energy;homeostatic process;macromolecular complex assembly;metabolic process;phosphorus metabolic process;primary metabolic process;prote…	cell part;cytosol;extracellular organelle;macromolecular complex;organelle;protein complex;vesicle	Fructose and mannose metabolism;Galactose metabolism;Glycolysis / Gluconeogenesis;Methane metabolism;Pentose phosphate pathway		20	16	16	26	22	22	96.907	0	122.81	1223700000	68	3	4	12	4	5	6	4	6	4	8	12	A0A2R8Y891;P08237;F8VZI0;F8VX13;F8VNX2;F8VZQ1;F8VSL1;F8VP00;F8VW30;F8W1J8;F8VSF7;F8VUB8;F8VYK8;F8VTQ3;F8VVE3;H0YHB8	A0A2R8Y891;P08237;F8VZI0	ATP-dependent 6-phosphofructokinase, muscle type	PFKM		883;780;727;156;157;161;139;176;116;84;102;141;149;149;165;41
0.0370884	0.0266781	-0.450277	-0.589634	-0.6539	-1.69805	0	0.200464	0.175789	0.125694	3alpha,7alpha,12alpha-trihydroxy-5beta-cholest-24-enoyl-CoA hydratase activity;3-hydroxyacyl-CoA dehydrogenase activity;binding;carbon-oxygen lyase activity;catalytic activity;hydro-lyase activity;identical protein binding;isomerase activity;long-chain-enoyl-CoA hydratase activity;lyase activity;oxidoreductase activity;oxidoreductase activity, acting on CH-OH group of donors;oxidoreductase activi…	anatomical structure development;biological regulation;biosynthetic process;catabolic process;cell development;cell differentiation;cellular ketone metabolic process;cellular lipid metabolic process;cellular metabolic process;cellular process;developmental process;hormone metabolic process;lipid metabolic process;metabolic process;organic acid metabolic process;primary metabolic process;small mol…	cell part;intracellular membrane-bounded organelle;intracellular organelle;membrane;microbody;mitochondrion;organelle;peroxisome	Peroxisome;Primary bile acid biosynthesis		43	43	43	68.4	68.4	68.4	76.837	0	323.31	19188000000	378	39	34	36	34	10	35	31	36	40	39	44	A0A2R8YD50;P51659;E7EWE5;E7ER27;G5E9S2;E7ET17;A0A2R8Y7L2;E7EPL9;A0A2R8YDT8;A0A2R8YF45;A0A2R8Y7W2;A0A2R8YEG2;A0A2R8YF39	A0A2R8YD50;P51659;E7EWE5;E7ER27;G5E9S2;E7ET17;A0A2R8Y7L2;E7EPL9	Peroxisomal multifunctional enzyme type 2;(3R)-hydroxyacyl-CoA dehydrogenase;Enoyl-CoA hydratase 2	HSD17B4		711;736;712;500;596;599;589;474;166;172;105;59;50
0	0.277229	0.248117	0.303013	0.214788	-2.67386	-0.336237	-0.244576	-0.181316	-0.0162048	adenyl nucleotide binding;adenyl ribonucleotide binding;ATP binding;binding;catalytic activity;heat shock protein binding;Hsp90 protein binding;kinase activity;nucleotide binding;phosphotransferase activity, alcohol group as acceptor;protein binding;protein kinase activity;protein N-terminus binding;protein serine/threonine kinase activity;purine nucleotide binding;purine ribonucleoside triphosph…	biological regulation;biosynthetic process;cell cycle;cellular metabolic process;cellular nitrogen compound metabolic process;cellular process;locomotion;macromolecule metabolic process;macromolecule modification;metabolic process;mitotic cell cycle;nitrogen compound metabolic process;nucleobase-containing compound metabolic process;phosphorus metabolic process;primary metabolic process;protein f…	cell part;chromatin remodeling complex;cytosol;intracellular membrane-bounded organelle;intracellular organelle;macromolecular complex;membrane;nucleus;organelle;plasma membrane;protein complex;transcriptional repressor complex	Adherens junction;Circadian rhythm - plant;Measles;Ribosome biogenesis in eukaryotes;Tight junction;Wnt signaling pathway	S_TKc	12	12	12	48.8	48.8	48.8	41.79	0	109.78	4028300000	77	9	8	10	7	0	8	6	7	7	7	8	A0A2R8YF43;A0A2R8YD58;E7EU96;P68400;A0A2R8Y5A0;Q8NEV1;A0A2R8YDP2;A0A2R8YFU2;A0A2R8Y4D6;A0A2R8Y4H0;V9GYA2;A0A2R8YDY7;A0A2R8YEW1;A0A2R8Y3W6;A0A2R8Y797;A0A2R8YEL7;V9GY80;A0A2R8YF47;A0A2R8YCK2;A0A2R8Y7T1;A0A087WY74;A0A2R8YCC9	A0A2R8YF43;A0A2R8YD58;E7EU96;P68400;A0A2R8Y5A0;Q8NEV1;A0A2R8YDP2;A0A2R8YFU2;A0A2R8Y4D6;A0A2R8Y4H0;V9GYA2;A0A2R8YDY7;A0A2R8YEW1	Casein kinase II subunit alpha;Casein kinase II subunit alpha 3	CSNK2A1;CSNK2A3		363;376;385;391;354;391;354;374;207;256;144;131;133;74;86;88;92;94;117;152;118;33
0.544098	0	0.78021	-0.0369129	-0.921415	-2.78215	-0.843224	-0.937033	-0.664303	-0.348068	alpha-tubulin binding;beta-catenin binding;binding;catalytic activity;cation binding;core promoter binding;cytoskeletal protein binding;deacetylase activity;DNA binding;dynein complex binding;enzyme binding;heat shock protein binding;histone deacetylase activity;histone deacetylase activity (H3-K14 specific);histone deacetylase activity (H3-K9 specific);histone deacetylase binding;Hsp90 protein b…	autophagy;biological regulation;biosynthetic process;catabolic process;cell communication;cellular component assembly;cellular component disassembly;cellular component organization;cellular localization;cellular metabolic process;cellular nitrogen compound metabolic process;cellular process;chromatin modification;chromatin organization;chromosome organization;establishment of localization;histone…	cell leading edge;cell part;cell projection;chromatin remodeling complex;cytoplasm;cytosol;intracellular membrane-bounded organelle;intracellular organelle;macromolecular complex;neuron projection;nucleoplasm;nucleus;organelle;protein complex		ZnF_UBP	3	3	3	5.3	5.3	5.3	125.37	0	18.315	17943000	11	2	2	1	2	0	0	0	0	1	1	2	A0A2R8YDE6;Q9UBN7;A0A2R8YCS4	A0A2R8YDE6;Q9UBN7	Histone deacetylase 6	HDAC6		1160;1215;162
-0.172115	0.0945206	0.561565	0.249681	-0.191742	-1.53088	-0.382769	0.000843048	0	-0.467255	acid-ammonia (or amide) ligase activity;adenyl nucleotide binding;adenyl ribonucleotide binding;amine binding;amino acid binding;ammonia ligase activity;ATP binding;binding;carbon-carbon lyase activity;carboxylic acid binding;carboxy-lyase activity;catalytic activity;cation binding;glutamate binding;glutamate decarboxylase activity;glutamate-ammonia ligase activity;identical protein binding;ion b…	amine metabolic process;biological regulation;biosynthetic process;catabolic process;cell communication;cell proliferation;cell-cell signaling;cellular amino acid metabolic process;cellular component assembly;cellular component organization;cellular ketone metabolic process;cellular metabolic process;cellular nitrogen compound metabolic process;cellular process;establishment of localization;macro…	cell part;cytoplasm;cytosol;endoplasmic reticulum;extracellular organelle;intracellular membrane-bounded organelle;intracellular organelle;macromolecular complex;mitochondrion;nucleus;organelle;protein complex;vesicle	Alanine, aspartate and glutamate metabolism;Arginine and proline metabolism;Nitrogen metabolism;Two-component system		7	7	7	16.6	16.6	16.6	57.174	0	86.914	766010000	41	4	5	6	4	0	3	3	3	2	6	5	A0A2R8YDT1;P15104	A0A2R8YDT1;P15104	Glutamine synthetase	GLUL		507;373
0.455877	0.274633	0.442366	0.0420742	0	-1.79618	-0.295801	-0.475088	-0.810259	-0.320578	adenyl nucleotide binding;adenyl ribonucleotide binding;ATP binding;binding;catalytic activity;guanylate kinase activity;kinase activity;nucleobase-containing compound kinase activity;nucleotide binding;nucleotide kinase activity;phosphotransferase activity, alcohol group as acceptor;phosphotransferase activity, phosphate group as acceptor;protein kinase activity;protein serine/threonine kinase a…	biological adhesion;biological regulation;cell adhesion;cell communication;cell-cell signaling;cellular component organization;cellular metabolic process;cellular nitrogen compound metabolic process;cellular process;establishment of localization;extracellular matrix organization;extracellular structure organization;ion transport;metabolic process;neurotransmitter transport;nitrogen compound metab…	cell part;cytoplasm;cytoskeleton;cytosol;intracellular non-membrane-bounded organelle;intracellular organelle;membrane;nucleolus;organelle;plasma membrane	Tight junction	GuKc;L27;PDZ;S_TKc;SH3	18	18	18	27.9	27.9	27.9	103.16	0	74.196	1273700000	79	10	10	14	11	0	3	3	2	3	9	14	A0A2U3TZM1;A0A2R8YE77;O14936;A0A2R8Y6F8;A0A2U3TZN6;A0A2U3TZM4;A0A2R8YFN5;A0A2R8YEK3;Q5JS72;A0A2R8Y3B3;Q5JS74;Q5JS79;A0A2R8YGH2;A0A2R8YEJ7;A0A2R8Y6D8;A0A2R8Y4K4;A0A2R8Y7X6;A0A2R8Y472	A0A2U3TZM1;A0A2R8YE77;O14936;A0A2R8Y6F8;A0A2U3TZN6;A0A2U3TZM4;A0A2R8YFN5;A0A2R8YEK3;Q5JS72;A0A2R8Y3B3;Q5JS74	Peripheral plasma membrane protein CASK	CASK		908;920;926;903;880;892;904;927;518;555;590;538;132;173;109;140;193;68
-0.416744	-0.130037	0.0538273	-0.0469894	0.647062	-0.0636749	-0.13855	0.167389	0.227791	0		anatomical structure formation involved in morphogenesis;biological regulation;cell differentiation;cellular localization;cellular process;developmental process;establishment of localization;localization;membrane docking;organelle localization;protein transport;transport;vesicle-mediated transport	cell part;endosome;intracellular membrane-bounded organelle;intracellular organelle;membrane;organelle			7	7	7	16.5	16.5	16.5	71.695	0	22.247	102180000	22	3	2	3	5	0	1	0	1	1	4	2	A0A2R8YF87;Q96AX1;H3BMM5;F5H6Y0;F5H2X5;F5H7N5;A0A2R8Y5U3	A0A2R8YF87;Q96AX1;H3BMM5	Vacuolar protein sorting-associated protein 33A	VPS33A		637;596;538;186;153;42;198
0.324039	0.216703	0.08778	0.219316	-0.21504	-0.320408	0.09655	-0.484652	-0.298468	-0.234129	binding;cation binding;ion binding;metal ion binding;transition metal ion binding;zinc ion binding	cellular process;establishment of localization;Golgi vesicle transport;protein transport;transport;vesicle-mediated transport	cell part;endomembrane system;intracellular membrane-bounded organelle;intracellular organelle;macromolecular complex;membrane;organelle;protein complex	Protein processing in endoplasmic reticulum		21	18	18	36.6	33.6	33.6	84.472	0	172.25	997110000	100	9	9	13	10	3	8	8	9	8	8	15	A0A2R8YFH5;Q15437;Q5QPE1;Q5QPE2;A0A2R8Y633;A0A2R8Y7S7;A0A2R8YF30	A0A2R8YFH5;Q15437	Protein transport protein Sec23B	SEC23B		749;767;246;331;52;59;32
-0.22991	0.0916615	-0.37332	-0.0248051	0.0836353	0	-0.273275	0.302711	0.0664711	-0.110514	binding;catalytic activity;cation binding;endopeptidase activity;exopeptidase activity;hydrolase activity;ion binding;metal ion binding;peptidase activity;peptidase activity, acting on L-amino acid peptides;peptide binding;serine hydrolase activity;serine-type endopeptidase activity;serine-type peptidase activity;tripeptidyl-peptidase activity	anatomical structure development;biological regulation;catabolic process;cell differentiation;cellular component organization;cellular metabolic process;cellular process;developmental process;homeostatic process;lipid metabolic process;macromolecule metabolic process;metabolic process;multicellular organismal process;neurological system process;organelle organization;peptide metabolic process;pri…	cell part;cytoplasmic membrane-bounded vesicle;extracellular organelle;intracellular membrane-bounded organelle;intracellular organelle;lysosome;mitochondrion;organelle;vacuole;vesicle	Lysosome	Pro-kuma_activ	6	6	6	23	23	23	50.889	0	41.861	454990000	43	5	4	3	3	1	4	4	5	5	4	5	A0A2R8YGD1;O14773;A0A2R8Y7U1;A0A2R8YD45;A0A2R8Y7I4;A0A2R8YD72;A0A2R8YDY1	A0A2R8YGD1;O14773;A0A2R8Y7U1;A0A2R8YD45	Tripeptidyl-peptidase 1	TPP1	3	470;563;400;500;162;92;99
0.0702209	-0.06884	-0.371507	-0.00657845	0	-3.06075	-0.551742	-0.804717	-0.586587	-0.596714	binding;complement binding;protein binding	biological regulation;cell activation;cellular process;coagulation;immune system process;multicellular organismal process;regulation of body fluid levels;response to stimulus;response to stress;signal transduction	cell part;cell surface;extracellular organelle;extracellular region;extracellular space;membrane;organelle;plasma membrane;vesicle	Complement and coagulation cascades;Hematopoietic cell lineage	LU	2	2	2	18.5	18.5	18.5	11.985	0	4.7533	332440000	5	1	0	1	1	0	0	0	0	0	1	1	E9PNW4;A0A2U3TZL5;E9PR17;P13987	E9PNW4;A0A2U3TZL5;E9PR17;P13987	CD59 glycoprotein	CD59	1	108;120;130;128
0.0140572	-0.110529	0	0.199608	0.163471	-0.308186	-0.078167	0.0711517	-0.188459	-0.162577	adenyl nucleotide binding;adenyl ribonucleotide binding;ATP binding;binding;nucleotide binding;purine nucleotide binding;purine ribonucleoside triphosphate binding;purine ribonucleotide binding;ribonucleotide binding	cellular process;response to abiotic stimulus;response to heat;response to stimulus;response to stress	cell part;intracellular membrane-bounded organelle;intracellular organelle;mitochondrion;organelle		AAA;ANK;ClpB_D2-small	19	19	7	31.6	31.6	10.3	76.852	0	59.87	1249100000	82	9	9	10	10	3	6	5	4	5	9	12	A0A2U3TZY2;Q9H078;H0YGM0;A0A2R8Y6R5;F5H392;A0A2R8Y7E8	A0A2U3TZY2;Q9H078;H0YGM0	Caseinolytic peptidase B protein homolog	CLPB		692;707;712;327;149;122
-0.0240269	-0.0408859	0.264503	0	-1.19253	-2.20109	0.00483513	0.0248604	-0.757386	-0.414136	adenyl nucleotide binding;adenyl ribonucleotide binding;ATP binding;binding;catalytic activity;FAT10 activating enzyme activity;nucleotide binding;purine nucleotide binding;purine ribonucleoside triphosphate binding;purine ribonucleotide binding;ribonucleotide binding;small protein activating enzyme activity	catabolic process;cellular metabolic process;cellular process;macromolecule metabolic process;macromolecule modification;metabolic process;primary metabolic process;protein metabolic process;protein modification by small protein conjugation or removal;protein modification process;proteolysis;proteolysis involved in cellular protein catabolic process	cell part;cytoplasm;cytosol	Ubiquitin mediated proteolysis	UBA_e1_C	5	5	5	6.6	6.6	6.6	117.97	0	10.191	87502000	11	2	3	2	1	0	1	1	0	0	1	0	A0AVT1;H0Y8S8	A0AVT1	Ubiquitin-like modifier-activating enzyme 6	UBA6		1052;271
-0.308838	-0.35729	0.0539722	-0.742846	-0.927261	-2.32295	-0.0585632	-0.925711	-0.772304	0.200478		biological regulation;locomotion;response to chemical stimulus;response to external stimulus;response to stimulus	cell part;site of polarized growth			3	3	3	7	7	7	71.639	0	13.882	46806000	12	0	2	1	1	0	2	1	0	1	2	2	A0MZ66	A0MZ66	Shootin-1	KIAA1598		631
0	-0.408039	-0.278414	-0.0578194	-0.221436	-0.406065	0.141052	0.254107	0.155554	0.263063	binding;catalytic activity;cation binding;coenzyme binding;cofactor binding;ion binding;magnesium ion binding;metal ion binding;thiamine pyrophosphate binding;transferase activity;vitamin binding		cell part;membrane			22	22	22	52.4	52.4	52.4	67.867	0	142.19	1508400000	112	11	12	11	17	1	6	8	4	10	15	17	A1L0T0;M0R026;E9PJS0;M0R1B5;M0QZX5;E9PL44;E9PNL1	A1L0T0;M0R026	Acetolactate synthase-like protein	ILVBL		632;525;262;165;229;166;52
1.27557	0.658625	-0.326193	-0.934994	-2.74404	-2.56061	1.68607	1.44928	0.229586	-0.229586	3 iron, 4 sulfur cluster binding;4 iron, 4 sulfur cluster binding;aconitate hydratase activity;binding;carbon-oxygen lyase activity;catalytic activity;cation binding;hydro-lyase activity;ion binding;iron ion binding;iron-sulfur cluster binding;lyase activity;metal cluster binding;metal ion binding;transition metal ion binding	catabolic process;cellular ketone metabolic process;cellular metabolic process;cellular process;cofactor metabolic process;generation of precursor metabolites and energy;metabolic process;organic acid metabolic process;small molecule metabolic process	cell part;intracellular membrane-bounded organelle;intracellular organelle;mitochondrion;nucleus;organelle	Carbon fixation pathways in prokaryotes;Citrate cycle (TCA cycle);Glyoxylate and dicarboxylate metabolism		15	15	15	26.2	26.2	26.2	87.819	0	53.274	550190000	53	8	4	4	0	0	13	6	5	2	2	9	A2A274;Q99798	A2A274;Q99798	Aconitate hydratase, mitochondrial	ACO2		805;780
0	0.439331	-0.160461	-0.0745621	-0.551769	-0.678532	0.0181828	0.0202827	0.845821	0.337681	binding;cytoskeletal protein binding;molecular transducer activity;protein binding;signal transducer activity;tubulin binding	anatomical structure development;anatomical structure morphogenesis;biological regulation;cellular component disassembly;cellular component morphogenesis;cellular component organization;cellular process;cytoskeleton organization;developmental process;multi-organism process;organelle organization;protein depolymerization;regulation of organelle organization;response to biotic stimulus;response to …	cell part;cell projection;cytoplasm;cytosol;extracellular organelle;intracellular;macromolecular complex;membrane;neuron projection;organelle;protein complex;vesicle	MAPK signaling pathway		5	5	4	62.4	62.4	51.8	9.7931	0	10.832	422470000	26	3	2	4	2	0	1	2	1	1	4	6	A2A2D0;P16949	A2A2D0;P16949	Stathmin	STMN1		85;149
0.0297766	-0.0297766	-0.577704	0.083951	-0.114072	-2.22372	-0.564503	-0.63747	-0.571834	-0.556271						2	2	2	7.8	7.8	7.8	45.034	0	4.6784	42306000	7	1	1	1	2	0	0	0	0	0	1	1	A2A2Q9;Q9Y312	A2A2Q9;Q9Y312	Protein AAR2 homolog	AAR2		398;384
-0.0762634	-0.102001	-0.614945	0.0180302	0.0994606	-2.51992	0.589441	-1.06638	-0.0483856	-0.0180302	binding;cation binding;copper ion binding;cytoskeletal protein binding;identical protein binding;ion binding;metal ion binding;microtubule binding;protein binding;transition metal ion binding;tubulin binding	behavior;biological regulation;cellular component assembly;cellular component organization;cellular homeostasis;cellular ion homeostasis;cellular process;homeostatic process;locomotion;macromolecular complex assembly;metabolic process;multicellular organismal process;neurological system process;protein complex assembly;regulation of cell cycle;regulation of protein modification process;response t…	cell part;cell surface;cytoplasm;endoplasmic reticulum;extracellular organelle;Golgi apparatus;intracellular membrane-bounded organelle;intracellular organelle;membrane;nucleus;organelle;plasma membrane;vesicle	Prion diseases	PRP	2	2	2	9.6	9.6	9.6	27.278	0	5.3066	66502000	4	0	0	0	0	0	2	0	1	0	1	0	A2A2V1;P04156;X6RKS3	A2A2V1;P04156;X6RKS3	Major prion protein	PRNP	1	249;253;217
-0.744047	-0.552261	-0.574046	-0.558774	-0.864072	-2.43553	-0.0411186	0.133034	0.0411186	-0.610012	antigen binding;binding;peptide antigen binding;peptide binding	biological regulation;cellular process;immune system process;response to chemical stimulus;response to stimulus;signal transduction;viral reproduction	cell part;cell surface;endoplasmic reticulum;extracellular organelle;Golgi apparatus;intracellular membrane-bounded organelle;intracellular organelle;macromolecular complex;membrane;MHC protein complex;organelle;plasma membrane;protein complex;vesicle	Allograft rejection;Antigen processing and presentation;Autoimmune thyroid disease;Cell adhesion molecules (CAMs);Endocytosis;Graft-versus-host disease;Natural killer cell mediated cytotoxicity;Phagosome;Type I diabetes mellitus;Viral myocarditis	IGc1	14	3	1	45.4	14.5	4.3	41.301	0	9.6135	98507000	5	0	0	0	0	0	1	1	1	1	1	0	A2AEA2;P10321;O19617;A0A140T921;A0A140T9H5;A0A140T9U8;A0A1W2PRU9	A2AEA2;P10321;O19617;A0A140T921;A0A140T9H5;A0A140T9U8;A0A1W2PRU9	HLA class I histocompatibility antigen, Cw-7 alpha chain	HLA-C	1	372;366;366;368;372;397;244
-0.743908	-0.610077	0.229014	-0.229014	0.363397	-2.16214	-0.738785	-0.815203	-0.908173	-0.375344		biological regulation;catabolic process;cellular metabolic process;cellular nitrogen compound metabolic process;cellular process;establishment of localization;Golgi vesicle transport;macromolecule metabolic process;metabolic process;mRNA metabolic process;nitrogen compound metabolic process;nucleobase-containing compound metabolic process;primary metabolic process;RNA catabolic process;RNA metabo…	cell part;cytoplasm;Golgi apparatus;intracellular membrane-bounded organelle;intracellular non-membrane-bounded organelle;intracellular organelle;membrane;nucleolus;organelle			4	4	4	2.7	2.7	2.7	268.57	0	6.1331	17595000	6	0	1	1	2	0	1	0	0	0	1	0	A2RRP1;H0Y5G7	A2RRP1;H0Y5G7	Neuroblastoma-amplified sequence	NBAS		2371;1419
0.13678	-0.193903	-0.0875206	0.0103073	-0.0214653	0.635431	0.595243	-0.118341	0	0.488279	adenyl nucleotide binding;adenyl ribonucleotide binding;ATP binding;ATPase activity;binding;catalytic activity;hydrolase activity;hydrolase activity, acting on acid anhydrides;hydrolase activity, acting on acid anhydrides, in phosphorus-containing anhydrides;nucleoside-triphosphatase activity;nucleotide binding;purine nucleotide binding;purine ribonucleoside triphosphate binding;purine ribonucleo…		cell part;extracellular region;intracellular membrane-bounded organelle;intracellular organelle;mitochondrion;organelle		AAA;VWA	15	15	15	11.3	11.3	11.3	214.82	0	38.125	413160000	47	3	3	3	2	5	9	4	1	6	5	6	A3KMH1	A3KMH1	von Willebrand factor A domain-containing protein 8	VWA8		1905
-0.199389	-0.406067	0.370926	0.0856209	-0.302078	0.496326	0.367125	0	-0.346931	0.0457954	armadillo repeat domain binding;binding;estrogen receptor binding;hormone receptor binding;nuclear hormone receptor binding;protein binding;protein complex scaffold;protein domain specific binding;receptor binding;retinoic acid receptor binding;steroid hormone receptor binding;structural molecule activity;transcription factor binding	biological regulation;biosynthetic process;catabolic process;cellular metabolic process;cellular nitrogen compound metabolic process;cellular process;developmental process;gene silencing;macromolecule metabolic process;metabolic process;mRNA metabolic process;mRNA processing;multicellular organismal development;multicellular organismal process;nitrogen compound metabolic process;nucleobase-contai…	cell part;cytosol;extracellular space;intracellular membrane-bounded organelle;intracellular non-membrane-bounded organelle;intracellular organelle;macromolecular complex;membrane;microbody;nucleoplasm;organelle;protein complex;ribonucleoprotein complex;transcription factor complex	RNA degradation		12	12	12	5.7	5.7	5.7	266.94	0	21.84	362900000	28	2	5	4	3	1	6	0	0	1	2	4	A5YKK6;H3BMZ2;H3BR89;H3BMH0	A5YKK6	CCR4-NOT transcription complex subunit 1	CNOT1		2376;439;193;277
0	0.251656	0.373234	0.400789	0.517559	-2.80177	-0.642622	-0.589384	-0.627834	-0.471212	structural constituent of ribosome;structural molecule activity	biosynthetic process;cellular component disassembly;cellular component organization;cellular metabolic process;cellular process;macromolecule metabolic process;metabolic process;mitochondrial translation;mitochondrion organization;organelle organization;primary metabolic process;protein metabolic process;translation;translational elongation;translational initiation	cell part;cytoplasm;intracellular membrane-bounded organelle;intracellular non-membrane-bounded organelle;intracellular organelle;macromolecular complex;membrane;mitochondrion;organelle;ribonucleoprotein complex;ribosome;small ribosomal subunit			3	3	3	39.4	39.4	39.4	11.15	0	8.5869	313310000	11	2	2	2	2	0	1	1	0	0	0	1	A6ND22;Q9Y3D3	A6ND22;Q9Y3D3	28S ribosomal protein S16, mitochondrial	MRPS16		99;137
-0.704951	-0.437238	-0.585862	-0.557736	-0.860068	-2.27561	0.159791	0.0558119	-0.0742483	-0.0558119	binding;catalytic activity;cation binding;hydrolase activity;hydrolase activity, acting on ester bonds;ion binding;magnesium ion binding;metal ion binding;phosphatase activity;phosphoglycolate phosphatase activity;phosphoprotein phosphatase activity;phosphoric ester hydrolase activity;protein tyrosine phosphatase activity	carbohydrate metabolic process;cellular metabolic process;cellular process;macromolecule metabolic process;macromolecule modification;metabolic process;phosphorus metabolic process;primary metabolic process;protein dephosphorylation;protein metabolic process;protein modification process		Glyoxylate and dicarboxylate metabolism		3	3	3	11.2	11.2	11.2	34.006	0	32.67	68043000	10	1	0	0	0	0	2	3	2	2	0	0	A6NDG6	A6NDG6	Phosphoglycolate phosphatase	PGP		321
-0.806072	0.00889111	-0.710953	-0.656723	-0.00889111	-2.84386	0.509812	0.203652	-0.655643	-0.103528	catalytic activity;cysteine-type endopeptidase activity;cysteine-type peptidase activity;endopeptidase activity;GPI-anchor transamidase activity;hydrolase activity;intramolecular oxidoreductase activity;intramolecular oxidoreductase activity, interconverting keto- and enol-groups;intramolecular oxidoreductase activity, transposing S-S bonds;isomerase activity;peptidase activity;peptidase activity…	cellular metabolic process;cellular process;macromolecule metabolic process;macromolecule modification;metabolic process;primary metabolic process;protein folding;protein lipidation;protein metabolic process;protein modification process	cell part;macromolecular complex;membrane;protein complex	Glycosylphosphatidylinositol(GPI)-anchor biosynthesis		2	2	2	6.9	6.9	6.9	37.785	0	6.8819	75565000	10	1	1	1	1	0	2	1	0	1	1	1	A6NEM5;Q92643;B1AK81	A6NEM5;Q92643;B1AK81	GPI-anchor transamidase	PIGK		332;395;301
0.258331	-0.131918	-0.726055	-0.624049	-0.809773	-2.53508	0.244991	-0.663102	-0.20627	0	adenyl nucleotide binding;adenyl ribonucleotide binding;ATP binding;binding;catalytic activity;enzyme binding;enzyme regulator activity;histone deacetylase binding;histone deacetylase regulator activity;JUN kinase activity;kinase activity;MAP kinase activity;molecular transducer activity;nucleotide binding;phosphotransferase activity, alcohol group as acceptor;protein binding;protein kinase activ…	biological regulation;cell death;cellular metabolic process;cellular process;death;immune system process;macromolecule metabolic process;macromolecule modification;metabolic process;multicellular organismal process;peptidyl-amino acid modification;phosphorus metabolic process;primary metabolic process;protein metabolic process;protein modification process;protein phosphorylation;regulation of org…	cell part;cytosol;intracellular membrane-bounded organelle;intracellular organelle;mitochondrion;nucleoplasm;nucleus;organelle	Adipocytokine signaling pathway;Chagas disease (American trypanosomiasis);Colorectal cancer;Epithelial cell signaling in Helicobacter pylori infection;ErbB signaling pathway;Fc epsilon RI signaling pathway;Focal adhesion;GnRH signaling pathway;Hepatitis C;Insulin signaling pathway;ko05152;MAPK signaling pathway;Neurotrophin signaling pathway;NOD-like receptor signaling pathway;Osteoclast differen…	S_TKc	2	2	2	22.5	22.5	22.5	16.447	0	6.8347	38372000	9	2	1	1	0	0	1	1	0	2	0	1	C9J762;A6NF29;P45983	C9J762;A6NF29;P45983	Mitogen-activated protein kinase 8	MAPK8		142;218;427
-0.18249	-0.232522	0.0509043	0.10637	-0.0464487	-2.02333	-0.391932	0.288135	0.0464487	-0.430737	ADP-ribose diphosphatase activity;ADP-sugar diphosphatase activity;binding;catalytic activity;cation binding;hydrolase activity;hydrolase activity, acting on acid anhydrides;hydrolase activity, acting on acid anhydrides, in phosphorus-containing anhydrides;ion binding;magnesium ion binding;metal ion binding;nucleic acid binding;nucleoside-diphosphatase activity;pyrophosphatase activity;RNA bindin…	alcohol metabolic process;carbohydrate metabolic process;catabolic process;cellular metabolic process;cellular nitrogen compound metabolic process;cellular process;heterocycle metabolic process;metabolic process;nitrogen compound metabolic process;nucleobase-containing compound catabolic process;nucleobase-containing compound metabolic process;nucleobase-containing small molecule metabolic proces…	cell part;cytosol;extracellular organelle;intracellular;intracellular membrane-bounded organelle;intracellular organelle;nucleus;organelle;vesicle	Purine metabolism		6	6	6	28	28	28	25.895	0	14.259	664750000	25	1	3	5	3	0	3	2	1	1	3	3	A6NFX8;Q9UKK9;H0YEY4;A6NCQ0;A6NJU6	A6NFX8;Q9UKK9	ADP-sugar pyrophosphatase	NUDT5		232;219;137;180;186
-0.393066	-0.565856	0.150288	-0.675715	0	-2.34129	-0.877982	-0.527148	-0.518072	-0.550626	binding;catalytic activity;cation binding;coenzyme binding;cofactor binding;ion binding;metal ion binding;NADP binding;NADPH:quinone reductase activity;nucleotide binding;oxidoreductase activity;oxidoreductase activity, acting on NADH or NADPH;oxidoreductase activity, acting on NADH or NADPH, quinone or similar compound as acceptor;transition metal ion binding;zinc ion binding		cell part;cytosol			2	2	2	32.7	32.7	32.7	11.677	0	4.4215	24162000	5	1	2	0	1	0	0	0	0	0	1	0	C9JQD0;C9K0F7;C9JAL0;A6NND8;A6NHJ8;O95825;A0A0C4DG14;F8WF64;C9JZK8;H7C3I5;A6NMA8	C9JQD0;C9K0F7;C9JAL0;A6NND8;A6NHJ8;O95825;A0A0C4DG14;F8WF64;C9JZK8;H7C3I5;A6NMA8	Quinone oxidoreductase-like protein 1	CRYZL1		107;158;181;322;325;349;113;183;197;241;334
0.0219059	0.269262	0.30373	0.0156498	0.631498	-0.663616	-0.895979	-0.828536	-0.750786	-0.641939	binding;catalytic activity;cysteine-type endopeptidase activity;cysteine-type peptidase activity;endopeptidase activity;endopeptidase inhibitor activity;endopeptidase regulator activity;enzyme inhibitor activity;enzyme regulator activity;guanylyltransferase activity;hydrolase activity;nucleotidyltransferase activity;peptidase activity;peptidase activity, acting on L-amino acid peptides;peptidase …	biological regulation;catabolic process;cell communication;cell-cell signaling;cellular metabolic process;cellular process;macromolecule metabolic process;macromolecule modification;metabolic process;primary metabolic process;protein metabolic process;protein modification by small protein conjugation or removal;protein modification process;proteolysis;proteolysis involved in cellular protein cata…	cell part;cell surface;cytoplasm;cytoplasmic membrane-bounded vesicle;extracellular organelle;intracellular membrane-bounded organelle;intracellular organelle;macromolecular complex;membrane;nucleus;organelle;plasma membrane;proteasome complex;protein complex;synapse;vesicle		UBQ	7	7	7	28.1	28.1	28.1	51.086	0	40.35	312650000	25	3	3	3	3	0	3	0	2	1	2	5	A6NJA2;P54578;J3QQT6;J3KS55	A6NJA2;P54578	Ubiquitin carboxyl-terminal hydrolase;Ubiquitin carboxyl-terminal hydrolase 14	USP14		448;494;20;28
0	0.00512695	0.0416546	-0.372828	-0.0219898	-2.17972	-0.10025	-0.453829	-0.639975	-0.650266	aminopeptidase activity;binding;catalytic activity;cation binding;epoxide hydrolase activity;ether hydrolase activity;exopeptidase activity;hydrolase activity;hydrolase activity, acting on ether bonds;ion binding;metal ion binding;metalloexopeptidase activity;metallopeptidase activity;peptidase activity;peptidase activity, acting on L-amino acid peptides;transition metal ion binding;zinc ion bind…	biosynthetic process;cellular alkene metabolic process;cellular ketone metabolic process;cellular lipid metabolic process;cellular metabolic process;cellular process;lipid metabolic process;macromolecule metabolic process;metabolic process;organic acid metabolic process;primary metabolic process;protein metabolic process;proteolysis;small molecule metabolic process	cell part;extracellular organelle;extracellular region;extracellular space;membrane;organelle;plasma membrane;vesicle			7	7	7	24.1	24.1	24.1	68.168	0	23.564	124030000	18	3	5	2	1	0	1	1	1	0	2	2	A6NKB8;Q9H4A4;C9JMZ3;A0A087WUS4;A0A087WU27;H7C2T3	A6NKB8;Q9H4A4;C9JMZ3	Aminopeptidase B	RNPEP		611;650;344;151;171;168
0.443488	0.257714	-0.0668097	0.130149	-0.0375624	-2.49173	-0.206532	0.0375624	-0.0902586	-0.507705	antigen binding;binding;MHC class II protein complex binding;MHC protein complex binding	biological regulation;biosynthetic process;cell proliferation;cellular lipid metabolic process;cellular metabolic process;cellular process;interspecies interaction between organisms;lipid metabolic process;localization;locomotion;macromolecule metabolic process;macromolecule modification;metabolic process;multi-organism process;phosphorus metabolic process;primary metabolic process;protein metabo…	cell part;extracellular organelle;membrane;organelle;plasma membrane;vesicle	B cell receptor signaling pathway;Hepatitis C;Malaria		5	5	5	42.4	42.4	42.4	17.963	0	156.8	557730000	43	6	4	4	5	0	4	4	4	3	4	5	E9PJK1;E9PRJ8;H0YDL9;H0YDJ9;E9PIF1;A6NMH8;P60033;E9PM31;H0YEE2	E9PJK1;E9PRJ8;H0YDL9;H0YDJ9;E9PIF1;A6NMH8;P60033	Tetraspanin;CD81 antigen	CD81		165;209;221;225;242;274;236;92;148
-0.919075	-0.508118	0.207253	0.0503817	-0.148446	-1.76804	-0.546632	-0.59037	-0.765876	-0.523768	binding;binding, bridging;cytoskeletal adaptor activity;cytoskeletal protein binding;protein binding;protein binding, bridging	anatomical structure formation involved in morphogenesis;biological regulation;cellular component assembly;cellular component organization;cellular localization;cellular process;cytoskeleton organization;developmental process;Golgi organization;localization;organelle organization;regulation of cell cycle;regulation of mitotic cell cycle;regulation of organelle organization	cell part;centrosome;cytoplasm;Golgi apparatus;intracellular membrane-bounded organelle;intracellular non-membrane-bounded organelle;intracellular organelle;microtubule organizing center;organelle		FN3;IG;IGc2	3	3	3	10.3	10.3	10.3	68.12	0	21.567	16877000	12	1	1	2	5	0	0	0	0	1	1	1	A8MSZ8;A6NN50;O75147	A8MSZ8;A6NN50;O75147	Obscurin-like protein 1	OBSL1		612;1804;1896
-0.028698	0	-0.0319519	0.00728035	0.0537548	0.210104	0.158096	-0.0293617	0.219553	-0.151649						5	5	2	38.9	38.9	23	13.171	0	8.2376	208470000	14	2	2	2	2	1	1	0	0	0	1	3	A6ZKI3;Q17RB0	A6ZKI3;Q17RB0	Protein FAM127A;Protein FAM127C	FAM127A;FAM127C		113;113
-0.327159	-0.1072	0.1072	-0.603168	0.658357	-3.47851	-0.972269	-0.725722	-0.745125	-0.510381						3	3	3	9.9	9.9	9.9	63.512	0	9.4711	21326000	6	2	2	0	2	0	0	0	0	0	0	0	A8DPD7;Q9C0D3	A8DPD7;Q9C0D3	Protein zyg-11 homolog B	ZYG11B		566;744
0.031436	0.362733	-0.14808	-0.323049	-1.06737	-2.29378	-0.031436	0.193439	0.515063	-0.237657		biological regulation;circulatory system process;multicellular organismal process;response to chemical stimulus;response to stimulus;response to stress	cell part;endoplasmic reticulum;extracellular space;intracellular membrane-bounded organelle;intracellular organelle;nucleus;organelle			5	5	5	27.6	27.6	27.6	21.143	0	13.897	203340000	18	5	2	2	3	0	1	0	1	1	2	1	A8K878;P55145;H7C2D6	A8K878;P55145;H7C2D6	Mesencephalic astrocyte-derived neurotrophic factor	MANF		185;182;71
0.162804	-0.0732346	0.587891	0.318378	0.19171	-0.00526047	-0.302162	-0.738695	-0.1665	0	binding;enzyme binding;GTPase binding;protein binding;protein C-terminus binding;Ras GTPase binding;small GTPase binding	biological adhesion;biological regulation;cell adhesion;cell communication;cell junction organization;cell-cell signaling;cellular component assembly;cellular component organization;cellular process;response to stimulus;signal transduction;signaling	apical part of cell;cell part;cytoplasm;cytosol;membrane;nucleoplasm;plasma membrane	Adherens junction;Leukocyte transendothelial migration;Tight junction	FHA;PDZ;RA	21	21	21	19.9	19.9	19.9	201.8	0	160.89	673640000	83	9	10	14	10	2	5	2	3	7	11	10	A8MQ02;J3KN01;P55196;Q5TIG5;H0Y7R8;H0Y8L4;H0YA98;F8W9I4;E9PFY5;H0Y9I0;H0Y948	A8MQ02;J3KN01;P55196;Q5TIG5	Afadin	MLLT4		1781;1831;1824;1665;389;313;167;247;250;129;191
0	-0.0025177	0.48628	0.300831	0.26207	0.264717	0.113377	-0.68038	-0.981194	-0.141829	binding;mRNA binding;nucleic acid binding;RNA binding	anatomical structure development;biological regulation;developmental process;establishment of localization;nucleobase-containing compound transport;regulation of translation;transport	cell body;cell part;cell projection;cytoplasm;intracellular non-membrane-bounded organelle;intracellular organelle;macromolecular complex;membrane;neuron projection;nucleolus;nucleoplasm;organelle;polysome;protein complex;ribonucleoprotein complex;synapse		KH	6	5	5	14	12.5	12.5	61.515	0	37.479	158040000	24	2	5	4	4	1	0	0	1	0	2	5	R9WNI0;A8MQB8;G3V0J0;Q06787;A0A087WXI3;Q8IXW7;A0A087WWR6;A0A087WY29	R9WNI0;A8MQB8;G3V0J0;Q06787;A0A087WXI3;Q8IXW7	Fragile X mental retardation protein 1	FMR1		544;582;592;632;419;297;102;252
-0.578116	-0.462088	-0.134811	0.032402	0.129564	-3.3463	-0.586379	-0.858465	-0.780083	-0.667403	protein transporter activity;substrate-specific transporter activity;transporter activity	establishment of localization;protein transport;transport	cell part;endosome;intracellular membrane-bounded organelle;intracellular organelle;nucleus;organelle			4	4	4	30.5	30.5	30.5	27.958	0	14.577	53568000	10	1	2	2	2	0	0	0	0	0	2	1	A8MTY9;O14972;A8MY26	A8MTY9;O14972;A8MY26	Down syndrome critical region protein 3	DSCR3		249;297;172
-0.742319	0.54418	-0.122078	0.506153	1.06381	-1.98853	-0.0174007	-0.401911	0	-0.197617			cell part			7	7	6	17.2	17.2	16.1	87.434	0	26.376	130440000	17	1	1	4	6	0	1	0	0	0	2	2	A8MVW0;K7EMG4	A8MVW0	Protein FAM171A2	FAM171A2	1	826;159
0.0498276	-0.014286	0.588636	0.64019	1.08544	0	-0.269869	-1.08777	-0.900894	-0.303703	binding;nucleic acid binding;RNA binding	biosynthetic process;cellular component assembly;cellular component organization;cellular macromolecular complex assembly;cellular metabolic process;cellular nitrogen compound metabolic process;cellular process;macromolecular complex assembly;macromolecule metabolic process;metabolic process;mRNA metabolic process;mRNA processing;nitrogen compound metabolic process;nucleobase-containing compound …	cell part;cytosol;macromolecular complex;nucleoplasm;protein complex;ribonucleoprotein complex;small nuclear ribonucleoprotein complex;small nucleolar ribonucleoprotein complex;spliceosomal complex	Spliceosome	Sm	3	3	3	36.8	36.8	36.8	8.496	0	5.7811	845780000	17	1	3	2	2	1	1	1	1	1	2	2	P62308;A8MWD9;Q49AN9;F5H013;C9JVQ0	P62308;A8MWD9;Q49AN9;F5H013;C9JVQ0	Small nuclear ribonucleoprotein G;Putative small nuclear ribonucleoprotein G-like protein 15	SNRPG;SNRPGP15		76;76;64;68;96
-0.345934	-0.293043	0	-0.360546	0.191118	-2.59841	-0.700262	-0.764676	0.0229759	-0.622693	4 iron, 4 sulfur cluster binding;5'-3' DNA helicase activity;adenyl nucleotide binding;adenyl ribonucleotide binding;ATP binding;ATPase activity;ATPase activity, coupled;ATP-dependent DNA helicase activity;ATP-dependent helicase activity;binding;catalytic activity;cation binding;DNA binding;DNA helicase activity;DNA-dependent ATPase activity;helicase activity;hydrolase activity;hydrolase activity…	aging;anatomical structure development;anatomical structure formation involved in morphogenesis;biological regulation;biosynthetic process;catabolic process;cell death;cell differentiation;cell division;cell maturation;cell proliferation;cellular component assembly;cellular component organization;cellular metabolic process;cellular nitrogen compound metabolic process;cellular process;chromosome s…	cell part;cytoplasm;intracellular membrane-bounded organelle;intracellular non-membrane-bounded organelle;intracellular organelle;macromolecular complex;nucleoplasm;nucleus;organelle;protein complex;transcription factor complex	Basal transcription factors;Nucleotide excision repair	DEXDc2;HELICc2	4	4	4	11	11	11	80.511	0	39.758	86834000	15	1	1	1	3	1	1	1	2	1	3	0	A8MX75;P18074;K7EKF3;E7EVE9;K7EIT8	A8MX75;P18074;K7EKF3;E7EVE9	TFIIH basal transcription factor complex helicase XPD subunit	ERCC2		706;760;202;682;292
-0.365576	0.0583763	0.0833454	0	-0.0638599	0.212502	-0.23489	0.293797	0.00808525	-0.162859		biological regulation;carbohydrate metabolic process;cell cycle;cellular component organization;cellular metabolic process;cellular process;establishment of localization;Golgi vesicle transport;immune system process;macromolecule metabolic process;macromolecule modification;membrane organization;metabolic process;mitotic cell cycle;nucleobase-containing compound transport;organelle organization;p…	cell part;cytosol;extracellular organelle;macromolecular complex;membrane;nuclear envelope;organelle;protein complex;vesicle	Protein processing in endoplasmic reticulum;RNA transport	WD40	4	4	4	21.8	21.8	21.8	31.595	0	37.826	255580000	27	4	3	4	3	2	1	2	2	2	2	2	A8MXL6;P55735;E7ERC8	A8MXL6;P55735	Protein SEC13 homolog	SEC13		284;322;86
0	0.0223713	-0.480047	-0.724075	-1.18862	-1.60054	0.511667	0.602896	0.210468	0.632929	binding;catalytic activity;cation binding;hydrolase activity;ion binding;metal ion binding;protein binding;receptor binding		cell part;intracellular membrane-bounded organelle;intracellular organelle;microbody;mitochondrion;organelle;peroxisome	Peroxisome		13	13	13	57.6	57.6	57.6	42.233	0	51.543	1271700000	63	8	6	5	6	0	6	4	5	9	5	9	A8MXV4	A8MXV4	Nucleoside diphosphate-linked moiety X motif 19, mitochondrial	NUDT19		375
0.384626	0.508112	0.0808945	-0.0748367	-0.471062	-2.56696	-0.0425549	-0.306625	-0.355337	0.113901	binding;GTP binding;guanyl nucleotide binding;guanyl ribonucleotide binding;nucleotide binding;purine nucleotide binding;purine ribonucleoside triphosphate binding;purine ribonucleotide binding;ribonucleotide binding	biological regulation;cellular process;response to stimulus;signal transduction	cell part;cytoplasm;intracellular membrane-bounded organelle;intracellular organelle;membrane;mitochondrion;organelle			3	3	3	18	18	18	26.624	0	10.131	113480000	17	2	2	3	1	0	2	0	0	1	2	4	J3QKW7;A8MZF9;P55039;J3QR71;J3QRI9;J3QL90;J3KRL5;J3QKV7	J3QKW7;A8MZF9;P55039;J3QR71;J3QRI9	Developmentally-regulated GTP-binding protein 2	DRG2		244;343;364;158;172;112;113;161
0.0342979	-0.0342979	0.5709	0.40589	0.253929	-2.59894	-0.85957	-0.655256	-0.838244	-0.311388	binding;DNA binding;nucleic acid binding	biosynthetic process;cellular metabolic process;cellular nitrogen compound metabolic process;cellular process;establishment of localization;macromolecule metabolic process;metabolic process;mRNA metabolic process;mRNA processing;nitrogen compound metabolic process;nuclear transport;nucleobase-containing compound metabolic process;nucleobase-containing compound transport;nucleocytoplasmic transpor…	cell part;cytosol;intracellular membrane-bounded organelle;intracellular organelle;macromolecular complex;nucleoplasm;nucleus;organelle;ribonucleoprotein complex;spliceosomal complex	mRNA surveillance pathway;RNA transport	PWI	3	3	3	5.8	5.8	5.8	103.39	0	42.111	110590000	14	1	4	2	2	0	0	1	0	1	1	2	A9Z1X7;Q8IYB3;M0R1E7;E9PCT1;M0QXG5;M0R088	A9Z1X7;Q8IYB3;M0R1E7;E9PCT1	Serine/arginine repetitive matrix protein 1	SRRM1		913;904;79;820;101;681
-0.395338	-0.263523	0	0.238688	0.652681	1.24107	-0.014534	0.153151	0.195852	-0.663486	binding;nucleic acid binding;RNA binding;translation factor activity, nucleic acid binding;translation initiation factor activity	biological regulation;cellular component assembly;cellular component organization;cellular macromolecular complex assembly;cellular process;macromolecular complex assembly;regulation of translation;ribonucleoprotein complex assembly;translational initiation	cell part;macromolecular complex;membrane;nucleoplasm;protein complex;ribonucleoprotein complex			27	27	27	44.6	44.6	44.6	70.901	0	295.81	2669600000	162	9	16	20	22	13	18	9	12	11	16	16	B0QY89;Q9Y262;B0QY90;C9JHP4;C9K0Q7;H7C3A0;H0Y7E6	B0QY89;Q9Y262;B0QY90	Eukaryotic translation initiation factor 3 subunit L	EIF3L		607;564;466;150;183;127;109
0.106058	0	0.380129	0.629055	0.742582	0.531706	-0.696636	-0.348948	-0.285664	-0.367134	binding;cation binding;identical protein binding;ion binding;metal ion binding;nucleic acid binding;nucleotide binding;protein binding;RNA binding;transition metal ion binding;zinc ion binding	biological regulation;biosynthetic process;cellular metabolic process;cellular nitrogen compound metabolic process;cellular process;macromolecule metabolic process;metabolic process;nitrogen compound metabolic process;nucleobase-containing compound metabolic process;primary metabolic process;RNA metabolic process	cell part;cytoplasm;intracellular membrane-bounded organelle;intracellular non-membrane-bounded organelle;intracellular organelle;membrane;nucleolus;nucleoplasm;nucleus;organelle;plasma membrane		RRM;ZnF_RBZ	4	4	4	11.7	11.7	11.7	64.929	0	43.643	1509200000	46	4	5	6	7	1	4	2	1	2	6	8	B0QYK0;Q01844;A0A0D9SFL3;C9JGE3;H7BY36	B0QYK0;Q01844;A0A0D9SFL3;C9JGE3;H7BY36	RNA-binding protein EWS	EWSR1		618;656;584;620;308
0	0.0448437	-0.375122	-0.678928	-0.965328	-1.68247	0.274927	0.577812	0.649719	0.539333	binding;calcium ion binding;calcium-dependent phospholipid binding;catalytic activity;cation binding;endopeptidase activity;hydrolase activity;identical protein binding;ion binding;lipid binding;metal ion binding;NF-kappaB binding;peptidase activity;peptidase activity, acting on L-amino acid peptides;phosphatidylserine binding;phospholipid binding;protein binding;protein dimerization activity;pro…	biological regulation;biosynthetic process;cellular lipid metabolic process;cellular metabolic process;cellular process;establishment of localization;lipid metabolic process;macromolecule metabolic process;metabolic process;primary metabolic process;protein metabolic process;proteolysis;response to chemical stimulus;response to stimulus;small molecule metabolic process;transport;vesicle-mediated …	cell part;cytoplasm;cytosol;extracellular organelle;intracellular membrane-bounded organelle;intracellular organelle;membrane;nucleus;organelle;plasma membrane;vesicle		C2;VWA	14	14	14	30.4	30.4	30.4	59.717	0	57.065	1048900000	70	6	4	6	6	1	6	5	9	10	7	10	B0QZ18;Q99829;F2Z2V0;A6PVH9;E7ENH5;Q5JX45;Q5JX56;Q5JX58;Q5JX59;Q5JX60;Q5JX44;Q5JX61;Q5JX52;Q5JX54;Q5JX57;E7EV27;Q5JX55;H0Y524;Q5JX53	B0QZ18;Q99829;F2Z2V0;A6PVH9;E7ENH5;Q5JX45;Q5JX56;Q5JX58;Q5JX59;Q5JX60;Q5JX44	Copine-1	CPNE1		542;537;533;481;427;386;174;201;209;231;304;213;305;136;137;138;152;208;66
0.404805	0.622247	-0.023942	-0.0579824	-0.21325	-2.97458	0.0533743	0.023942	-0.08319	0.334632	binding;protein binding;SNAP receptor activity;SNARE binding	biological regulation;cellular component organization;cellular membrane organization;cellular process;establishment of localization;lipid transport;membrane docking;membrane fusion;membrane organization;organelle fusion;organelle organization;protein transport;regulation of protein stability;transport;vesicle organization;vesicle-mediated transport	cell part;cytoplasmic membrane-bounded vesicle;endomembrane system;extracellular organelle;intracellular membrane-bounded organelle;intracellular organelle;macromolecular complex;membrane;organelle;protein complex;vesicle	Phagosome	SynN;t_SNARE	5	5	5	34.9	34.9	34.9	24.576	0	49.217	532570000	24	2	2	3	3	0	3	0	0	1	4	6	B1AJQ6;Q86Y82	B1AJQ6;Q86Y82	Syntaxin-12	STX12		215;276
-0.202251	0.0739975	-0.453705	-0.063591	-0.584467	-2.99063	0.101681	0.433651	0.575123	0.241497		anatomical structure development;biological regulation;cell development;cellular component assembly;cellular component organization;cellular process;cytoskeleton organization;developmental process;organelle organization;regulation of organelle organization	cell part;cell projection;cytoplasm;cytoplasmic membrane-bounded vesicle;cytoskeleton;F-actin capping protein complex;intracellular membrane-bounded organelle;intracellular non-membrane-bounded organelle;intracellular organelle;macromolecular complex;membrane;organelle;protein complex;vesicle			19	19	3	73.1	73.1	9.2	29.295	0	124.35	3352100000	103	8	7	11	11	0	12	8	8	12	11	15	B1AK87;B1AK88	B1AK87;B1AK88		CAPZB		260;301
0.240593	0.286591	-0.000429153	-0.0945301	0.141462	-2.49248	-0.00658226	-0.115414	0.000429153	-0.0347614	adenyl nucleotide binding;adenyl ribonucleotide binding;ATP binding;axon guidance receptor activity;binding;catalytic activity;cation binding;ephrin receptor activity;GPI-linked ephrin receptor activity;identical protein binding;ion binding;kinase activity;lipid binding;metal ion binding;molecular transducer activity;non-membrane spanning protein tyrosine kinase activity;nucleotide binding;phosph…	amine transport;anatomical structure development;anatomical structure formation involved in morphogenesis;anatomical structure morphogenesis;behavior;biological adhesion;biological regulation;biosynthetic process;cell activation;cell adhesion;cell differentiation;cell maturation;cell motility;cell proliferation;cell recognition;cellular component morphogenesis;cellular component movement;cellular…	cell body;cell part;cell projection;cytoplasm;cytosol;extracellular organelle;extracellular region;intracellular membrane-bounded organelle;intracellular organelle;lysosome;membrane;neuron projection;neuronal cell body;nucleus;organelle;plasma membrane;vacuole;vesicle	Axon guidance;B cell receptor signaling pathway;Fc epsilon RI signaling pathway;Osteoclast differentiation;Primary immunodeficiency	BTK;EPH_lbd;FN3;PH;SAM;SH2;SH3;TyrKc	15	12	12	21.4	18.3	18.3	105.56	0	62.501	342730000	47	4	3	5	7	0	5	5	2	3	6	7	B1AKC9;P29323;Q6NVW1;P54762;Q5JY90;U3NG26;Q06187;P29322	B1AKC9;P29323	Receptor protein-tyrosine kinase;Ephrin type-B receptor 2	EPHB2	1;1	946;1055;482;984;483;568;659;1005
0.108049	-0.0956078	0.495062	0.0316391	0.0363407	-1.83912	-0.237381	0.151361	-0.570251	-0.0316391	binding;catalytic activity;cation binding;endopeptidase activity;epidermal growth factor binding;growth factor binding;hormone binding;hydrolase activity;ion binding;metal ion binding;metalloendopeptidase activity;metallopeptidase activity;peptidase activity;peptidase activity, acting on L-amino acid peptides;protein binding	biological regulation;cell motility;cell proliferation;cellular component movement;cellular component organization;cellular process;locomotion;macromolecule metabolic process;metabolic process;primary metabolic process;protein metabolic process;proteolysis	cell part;cell surface;cytosol;intracellular membrane-bounded organelle;intracellular organelle;mitochondrion;organelle			10	10	10	11.2	11.2	11.2	125.12	0	17.717	246480000	26	4	6	3	5	0	1	1	0	0	4	2	G3V1R5;B1AKJ5;O43847;F5H7V1;H0Y5G9	G3V1R5;B1AKJ5;O43847;F5H7V1	Nardilysin	NRD1		1087;1219;1150;949;538
0.0425682	0.741005	0.414276	0.488733	0.759611	-2.9622	-0.285513	-0.584084	-0.0425682	-0.0947151	structural constituent of ribosome;structural molecule activity	biosynthetic process;cellular component disassembly;cellular component organization;cellular metabolic process;cellular process;macromolecule metabolic process;metabolic process;mitochondrial translation;mitochondrion organization;organelle organization;primary metabolic process;protein metabolic process;translation;translational elongation;translational initiation	cell part;intracellular non-membrane-bounded organelle;intracellular organelle;macromolecular complex;membrane;organelle;ribonucleoprotein complex;ribosome		L51_S25_CI-B8	2	2	2	13.6	13.6	13.6	18.657	0	22.179	153040000	9	2	1	1	1	1	1	0	0	1	0	1	H0Y6Y8;B1AL05;Q8N983;M0R051;H0YBU8	H0Y6Y8;B1AL05;Q8N983;M0R051;H0YBU8	39S ribosomal protein L43, mitochondrial	MRPL43		169;184;215;44;148
-0.320862	-0.156883	-0.090414	-0.0633736	0.254496	-2.03354	0.0640602	-0.0392971	0.15283	0.0392971	binding;carbohydrate binding;G-protein coupled receptor activity;latrotoxin receptor activity;molecular transducer activity;receptor activity;signal transducer activity;signaling receptor activity;transmembrane signaling receptor activity	biological regulation;cellular process;response to stimulus;signal transduction	cell part;membrane;plasma membrane		GPS;HormR;OLF	16	16	16	18.5	18.5	18.5	160.51	0	95.903	466080000	89	9	9	15	12	0	8	2	4	7	9	14	B1ALU3;O95490;B1ALU1;H0Y5C0;H0Y3V3	B1ALU3;O95490;B1ALU1;H0Y5C0	Latrophilin-2	ADGRL2;LPHN2	1	1431;1459;1384;1351;471
-0.889262	-0.528966	-0.644255	-0.417316	0.090107	0.155708	-0.755803	-0.0101986	-0.716089	0.0101986	binding;nucleic acid binding;RNA binding	catabolic process;cellular metabolic process;cellular nitrogen compound metabolic process;cellular process;macromolecule metabolic process;metabolic process;mRNA metabolic process;nitrogen compound metabolic process;nucleobase-containing compound metabolic process;primary metabolic process;RNA catabolic process;RNA metabolic process;RNA processing;rRNA processing	cell part;cytoplasm;cytosol;exosome (RNase complex);intracellular membrane-bounded organelle;intracellular non-membrane-bounded organelle;intracellular organelle;macromolecular complex;nucleolus;nucleoplasm;nucleus;organelle;protein complex	RNA degradation	S1	3	3	3	24.8	24.8	24.8	17.789	0	11.227	79949000	7	1	0	0	4	1	0	1	0	0	0	0	B1AMU7;Q9Y3B2;R4GNH9;R4GMQ7;B1AMU3;B1AMU4	B1AMU7;Q9Y3B2;R4GNH9;R4GMQ7;B1AMU3;B1AMU4	Exosome complex component CSL4	EXOSC1		165;195;139;143;170;178
-0.2106	0	-0.634937	0.112602	-0.864429	0.078764	-0.769611	-0.493383	-0.648893	-0.703371	acid-amino acid ligase activity;binding;catalytic activity;cation binding;CD40 receptor binding;cytokine receptor binding;enzyme binding;identical protein binding;ion binding;kinase binding;ligase activity;ligase activity, forming carbon-nitrogen bonds;lipid binding;metal ion binding;molecular transducer activity;phosphatase binding;protein binding;protein kinase binding;protein phosphatase bindi…	biological regulation;catabolic process;cell death;cellular component assembly;cellular component organization;cellular macromolecular complex assembly;cellular metabolic process;cellular process;death;immune system process;macromolecular complex assembly;macromolecule metabolic process;macromolecule modification;metabolic process;primary metabolic process;protein catabolic process;protein comple…	cell cortex;cell part;cytoplasm;cytosol;macromolecular complex;membrane;protein complex;receptor complex;ubiquitin ligase complex	Adipocytokine signaling pathway;Apoptosis;Hepatitis C;MAPK signaling pathway;Osteoclast differentiation;Pathways in cancer;Protein processing in endoplasmic reticulum;RIG-I-like receptor signaling pathway;Small cell lung cancer	MATH;RING	3	3	3	38.8	38.8	38.8	12.963	0	9.9753	32247000	9	2	1	3	0	0	0	0	0	0	1	2	B1AMY1;B1AMX7;B1AMX8;Q12933	B1AMY1;B1AMX7;B1AMX8;Q12933	TNF receptor-associated factor 2	TRAF2		121;171;193;501
-0.0383797	-0.074667	0.366461	0.420727	0.637823	0.70936	0	-0.274988	-0.405407	-0.236937	binding;mRNA binding;nucleic acid binding;nucleotide binding;poly(A) RNA binding;poly(U) RNA binding;poly-purine tract binding;poly-pyrimidine tract binding;RNA binding;single-stranded RNA binding	biological regulation;biosynthetic process;catabolic process;cellular metabolic process;cellular nitrogen compound metabolic process;cellular process;coagulation;macromolecule metabolic process;metabolic process;multicellular organismal process;nitrogen compound metabolic process;nucleobase-containing compound metabolic process;primary metabolic process;protein metabolic process;regulation of bod…	cell part;cytoplasm;intracellular membrane-bounded organelle;intracellular non-membrane-bounded organelle;intracellular organelle;macromolecular complex;nucleus;organelle;ribonucleoprotein complex	mRNA surveillance pathway;RNA degradation;RNA transport	PolyA;RRM	27	15	1	48.6	31.5	1.8	67.97	0	51.056	3468600000	80	8	10	13	12	3	4	2	3	6	8	11	B1ANR0;Q13310;B1ANR1;H0YEQ8;H0YCC8;H0YER0;P0CB38	B1ANR0;Q13310	Polyadenylate-binding protein;Polyadenylate-binding protein 4	PABPC4		615;644;129;112;197;68;370
-0.201262	0.0906878	-0.473826	-0.19456	0.0222597	-2.16686	-0.0222597	0.188964	0.0356264	-0.181623	binding;enzyme inhibitor activity;enzyme regulator activity;lipid binding;receptor activity;viral receptor activity	biological regulation;cellular homeostasis;cellular ion homeostasis;cellular process;cytokine production;homeostatic process;immune system process;interspecies interaction between organisms;locomotion;macromolecule metabolic process;metabolic process;multicellular organismal process;multi-organism process;primary metabolic process;protein metabolic process;response to chemical stimulus;response t…	cell part;cell surface;extracellular organelle;extracellular region;membrane;organelle;plasma membrane;vesicle	Complement and coagulation cascades;Hematopoietic cell lineage;Viral myocarditis	CCP	9	9	5	49.7	49.7	19.3	35.695	0	34.226	446780000	41	4	3	4	6	0	2	3	2	2	9	6	H3BLV0;B1AP13;H7BY55;P08174;B1AP15	H3BLV0;B1AP13;H7BY55;P08174;B1AP15	Complement decay-accelerating factor	CD55	1	326;444;550;381;317
-0.0241213	-0.246722	-0.55969	-0.359384	0.158675	-2.5617	0.276784	0.0241213	-0.133424	0.176383	adenyl nucleotide binding;adenyl ribonucleotide binding;ATP binding;binding;catalytic activity;kinase activity;molecular transducer activity;nucleotide binding;phosphotransferase activity, alcohol group as acceptor;protein binding;protein kinase activity;protein tyrosine kinase activity;purine nucleotide binding;purine ribonucleoside triphosphate binding;purine ribonucleotide binding;receptor act…	anatomical structure formation involved in morphogenesis;anatomical structure morphogenesis;biological adhesion;biological regulation;cell adhesion;cell differentiation;cellular metabolic process;cellular process;developmental process;macromolecule metabolic process;macromolecule modification;metabolic process;multicellular organismal development;multicellular organismal process;peptidyl-amino ac…	cell part;membrane;plasma membrane		IGc2;KR;TyrKc	4	4	4	6.7	6.7	6.7	79.27	0	13.441	212430000	24	3	3	3	2	0	1	1	2	2	3	4	B1APY4;Q01974	B1APY4;Q01974	Tyrosine-protein kinase transmembrane receptor ROR2	ROR2	1	704;943
0.11453	0.0448809	0.104566	-0.0460463	0.353061	-1.89196	-0.515635	-0.0448809	-0.565026	-0.379653	binding;calcium ion binding;cation binding;ion binding;metal ion binding;polyubiquitin binding;protein binding;small conjugating protein binding;ubiquitin binding	biological regulation;cell proliferation;cellular component assembly;cellular component organization;cellular macromolecular complex assembly;cellular membrane organization;cellular process;endocytosis;endosome transport;establishment of localization;Golgi vesicle transport;interspecies interaction between organisms;locomotion;macromolecular complex assembly;membrane invagination;membrane organiz…	AP-type membrane coat adaptor complex;cell part;cytoplasm;cytosol;intracellular membrane-bounded organelle;intracellular organelle;macromolecular complex;membrane;organelle;plasma membrane;protein complex	Endocytosis	EFh;EH;UIM	8	8	8	21	21	21	83.653	0	74.773	200070000	27	3	3	5	3	1	2	2	1	0	3	4	B1AUU8;P42566;S4R3U1	B1AUU8;P42566	Epidermal growth factor receptor substrate 15	EPS15		762;896;90
-0.00191689	0.0429077	0.00191689	0.011858	-0.584538	-2.49279	-0.162098	0.0788269	0.202629	-0.0540199	adenyl nucleotide binding;adenyl ribonucleotide binding;ATP binding;binding;caspase inhibitor activity;caspase regulator activity;catalytic activity;cation binding;cysteine-type endopeptidase inhibitor activity;endopeptidase inhibitor activity;endopeptidase regulator activity;enzyme inhibitor activity;enzyme regulator activity;ion binding;kinase activity;magnesium ion binding;metal ion binding;nu…	anatomical structure development;biological regulation;cell communication;cell cycle;cell death;cell maturation;cell-cell signaling;cellular metabolic process;cellular process;circulatory system process;death;developmental maturation;developmental process;endocrine process;immune system process;locomotion;macromolecule metabolic process;macromolecule modification;metabolic process;multicellular o…	cell part;cytoplasm;cytosol;intracellular membrane-bounded organelle;intracellular non-membrane-bounded organelle;intracellular organelle;macromolecular complex;membrane;mitochondrion;nucleolus;nucleoplasm;nucleus;organelle;ribonucleoprotein complex;ribosome	Long-term potentiation;MAPK signaling pathway;mTOR signaling pathway;Neurotrophin signaling pathway;Oocyte meiosis;Progesterone-mediated oocyte maturation	S_TK_X;S_TKc	10	10	9	18.3	18.3	17	80.583	0	23.816	305010000	30	3	2	4	3	1	2	2	2	3	2	6	B4DG22;B1AXG1;B7ZB17;P51812;A0A2R8Y603;A0A2R8Y7S9;Q9UK32;D6RHW7;D6R910;D6RA62;D6RE03;B7Z3B5;F2Z2J1;Q15349	B4DG22;B1AXG1;B7ZB17;P51812;A0A2R8Y603	Ribosomal protein S6 kinase alpha-3	RPS6KA3		711;711;712;740;282;144;745;96;125;141;171;644;758;733
-0.955624	-0.79726	-0.410341	0.00163841	0.362642	0.250107	0	0.16618	0.179153	-0.0725899	binding;identical protein binding;nucleic acid binding;nucleotide binding;protein binding;RNA binding		cell part;intracellular membrane-bounded organelle;intracellular organelle;macromolecular complex;nucleoplasm;nucleus;organelle;ribonucleoprotein complex		RRM	24	24	2	61.1	61.1	8.8	28.916	0	225.58	17362000000	157	14	14	18	16	10	14	11	14	17	15	14	G3V4W0;B4DY08;B2R5W2;G3V4C1;G3V251;G3V2D6;G3V5X6;G3V3K6;A0A0G2JNQ3;O60812;B2RXH8;B4DSU6;G3V5V7;A0A0G2JPF8;P0DMR1;B7ZW38;G3V4M8;G3V2H6;E5RG71;B3KT61;Q86SE5	G3V4W0;B4DY08;B2R5W2;G3V4C1;G3V251;G3V2D6;G3V5X6;G3V3K6;A0A0G2JNQ3;O60812;B2RXH8	Heterogeneous nuclear ribonucleoprotein C-like 1;Heterogeneous nuclear ribonucleoprotein C-like 2	HNRNPC;HNRNPCL1;HNRNPCL2		262;288;290;292;126;214;117;121;293;293;293;147;180;293;293;293;66;54;85;280;291
0.0195198	0.212671	0.41501	-0.177179	-0.14805	-2.8984	-0.808049	-0.457215	-0.846794	-0.0360832	binding;catalytic activity;cation binding;demethylase activity;histone demethylase activity;histone demethylase activity (H3-R2 specific);histone demethylase activity (H4-R3 specific);identical protein binding;ion binding;iron ion binding;metal ion binding;nucleic acid binding;oxidoreductase activity;oxidoreductase activity, acting on paired donors, with incorporation or reduction of molecular ox…	anatomical structure development;anatomical structure formation involved in morphogenesis;biological regulation;biosynthetic process;cell activation;cell development;cell differentiation;cell recognition;cellular component organization;cellular metabolic process;cellular nitrogen compound metabolic process;cellular process;chromatin modification;chromatin organization;chromosome organization;deve…	cell part;intracellular membrane-bounded organelle;intracellular non-membrane-bounded organelle;intracellular organelle;membrane;nucleolus;nucleoplasm;nucleus;organelle;plasma membrane		JmjC	4	4	4	15.2	15.2	15.2	39.241	0	10.815	66084000	9	2	2	3	1	0	0	0	0	0	1	0	B2WTI3;B2WTI4;K7EJU9;Q6NYC1	B2WTI3;B2WTI4;K7EJU9;Q6NYC1	Bifunctional arginine demethylase and lysyl-hydroxylase JMJD6	JMJD6		335;361;395;403
-0.155359	-0.26841	0.306129	0.669048	0.807095	1.59888	0	-0.197233	0.053915	-0.272322	binding;nucleic acid binding;RNA binding;translation factor activity, nucleic acid binding;translation initiation factor activity	biological regulation;biosynthetic process;cellular component assembly;cellular component organization;cellular macromolecular complex assembly;cellular metabolic process;cellular process;macromolecular complex assembly;macromolecule metabolic process;metabolic process;primary metabolic process;protein metabolic process;regulation of translation;ribonucleoprotein complex assembly;translation;tran…	cell part;cytosol;extracellular organelle;macromolecular complex;membrane;organelle;protein complex;ribonucleoprotein complex;vesicle	Measles;RNA transport	JAB_MPN	11	11	11	44	44	44	41.581	0	47.421	514260000	44	4	6	8	9	2	1	2	3	2	3	4	B3KS98;O15372;A0A087WZK9;E5RJT0;E5RGU4;E5RFW7;E5RFH0;E5RHC7;E5RH59	B3KS98;O15372;A0A087WZK9	Eukaryotic translation initiation factor 3 subunit H	EIF3H		366;352;349;244;235;97;170;46;56
0.100919	-0.187757	-0.648857	-0.775546	-1.01438	-2.25965	0.645181	-0.0259638	-0.312692	0.0259638	branched-chain-amino-acid transaminase activity;catalytic activity;L-isoleucine transaminase activity;L-leucine transaminase activity;L-valine transaminase activity;transaminase activity;transferase activity;transferase activity, transferring nitrogenous groups	amine metabolic process;biological regulation;biosynthetic process;catabolic process;cellular amino acid metabolic process;cellular ketone metabolic process;cellular metabolic process;cellular nitrogen compound metabolic process;cellular process;metabolic process;nitrogen compound metabolic process;organic acid metabolic process;primary metabolic process;small molecule metabolic process	cell part;intracellular membrane-bounded organelle;intracellular organelle;mitochondrion;organelle	Pantothenate and CoA biosynthesis;Valine, leucine and isoleucine biosynthesis;Valine, leucine and isoleucine degradation		3	3	3	16	16	16	34.897	0	7.2687	54284000	8	1	0	0	0	0	2	1	1	1	0	2	M0QZP4;B3KSI3;M0QZ10;M0QXF9;O15382	M0QZP4;B3KSI3;M0QZ10;M0QXF9;O15382	Branched-chain-amino-acid aminotransferase;Branched-chain-amino-acid aminotransferase, mitochondrial	BCAT2		313;352;405;445;392
0.117818	-0.0364046	-0.131839	-0.0789671	0.299813	-2.68826	-0.657265	-0.884223	-0.611911	-0.476464	acetylcholine receptor regulator activity;alpha-tubulin binding;binding;CAAX-protein geranylgeranyltransferase activity;catalytic activity;cytoskeletal protein binding;microtubule binding;prenyltransferase activity;protein binding;protein farnesyltransferase activity;protein geranylgeranyltransferase activity;protein prenyltransferase activity;Rab geranylgeranyltransferase activity;receptor regul…	biological regulation;cell death;cellular component disassembly;cellular component organization;cellular metabolic process;cellular process;death;detection of stimulus;macromolecule metabolic process;macromolecule modification;metabolic process;primary metabolic process;protein metabolic process;protein modification process;regulation of protein modification process;response to abiotic stimulus;r…	cell part;cytoplasm;cytosol;macromolecular complex;protein complex			2	2	2	12.3	12.3	12.3	27.443	0	4.0833	25376000	7	2	2	1	1	0	0	0	0	0	1	0	B3KVN2;P49354;E9PPM9;H0YCW1;E9PQP6	B3KVN2;P49354;E9PPM9;H0YCW1;E9PQP6	Protein farnesyltransferase/geranylgeranyltransferase type-1 subunit alpha	FNTA		228;379;60;196;249
0.346791	-0.0789022	-0.468063	0.136329	-0.278279	-2.86218	0.239156	0.0789022	-0.718683	-0.248515	active transmembrane transporter activity;anion transmembrane transporter activity;anion:cation symporter activity;binding;cation transmembrane transporter activity;cation:chloride symporter activity;chloride transmembrane transporter activity;enzyme binding;inorganic anion transmembrane transporter activity;inorganic cation transmembrane transporter activity;ion transmembrane transporter activit…	anatomical structure formation involved in morphogenesis;cellular process;developmental process;establishment of localization;ion transport;response to abiotic stimulus;response to osmotic stress;response to stimulus;response to stress;transmembrane transport;transport	cell part;membrane;plasma membrane			3	3	1	2.9	2.9	1.1	103.82	0	4.2423	51532000	7	0	0	1	1	0	1	0	0	0	1	3	H0YKQ8;B3KXX3;Q9UHW9;H0YMQ9;J3QSF2	H0YKQ8;B3KXX3;Q9UHW9;H0YMQ9	Solute carrier family 12 member 6	SLC12A6	1	942;962;1150;906;90
-0.461442	-0.304189	0.0308714	-0.0234041	0.0234041	-2.31776	0.124875	-0.590627	0.280047	-0.42097	active transmembrane transporter activity;macromolecule transmembrane transporter activity;P-P-bond-hydrolysis-driven protein transmembrane transporter activity;P-P-bond-hydrolysis-driven transmembrane transporter activity;primary active transmembrane transporter activity;protein transmembrane transporter activity;protein transporter activity;substrate-specific transmembrane transporter activity;…	cellular metabolic process;cellular process;establishment of localization;macromolecule metabolic process;metabolic process;primary metabolic process;protein metabolic process;protein targeting;protein transport;transport	cell part;intracellular membrane-bounded organelle;intracellular organelle;macromolecular complex;membrane;mitochondrial inner membrane presequence translocase complex;mitochondrion;organelle;protein complex			1	1	1	12.1	12.1	12.1	14.6	0	8.3543	82882000	10	2	1	1	1	0	1	1	1	0	1	1	B4DDK6;O14925;Q5SRD1	B4DDK6;O14925;Q5SRD1	Mitochondrial import inner membrane translocase subunit Tim23;Putative mitochondrial import inner membrane translocase subunit Tim23B	TIMM23B;TIMM23		140;209;257
0	-0.469124	-0.429838	-0.568062	-0.94033	0.231644	0.503796	0.538139	-0.175585	0.0961189	2 iron, 2 sulfur cluster binding;4 iron, 4 sulfur cluster binding;binding;catalytic activity;cation binding;electron carrier activity;ion binding;iron-sulfur cluster binding;metal cluster binding;metal ion binding;NADH dehydrogenase (quinone) activity;NADH dehydrogenase (ubiquinone) activity;NADH dehydrogenase activity;oxidoreductase activity;oxidoreductase activity, acting on NADH or NADPH;oxido…	biological regulation;cellular component organization;cellular homeostasis;cellular ion homeostasis;cellular metabolic process;cellular nitrogen compound metabolic process;cellular process;cellular respiration;generation of precursor metabolites and energy;heterocycle metabolic process;homeostatic process;metabolic process;mitochondrion organization;nitrogen compound metabolic process;nucleobase-…	cell part;intracellular membrane-bounded organelle;intracellular organelle;macromolecular complex;membrane;mitochondrion;NADH dehydrogenase complex;organelle;protein complex	Alzheimer's disease;Huntington's disease;Oxidative phosphorylation;Parkinson's disease	NADH-G_4Fe-4S_3	4	4	4	11	11	11	66.921	0	13.939	78102000	27	2	1	3	0	1	4	3	3	4	2	4	B4DJ81;P28331	B4DJ81;P28331	NADH-ubiquinone oxidoreductase 75 kDa subunit, mitochondrial	NDUFS1		611;727
0.392502	0.268305	0	-0.0411148	-0.352089	-2.26718	0.358025	-0.896188	-0.104771	-0.0104675			cell part;cytoplasm		VWA	5	5	5	15.6	15.6	15.6	51.583	0	8.5153	96827000	10	2	0	1	2	0	0	0	0	0	2	3	H3BRY6;B4DVT3;B4DJL6;Q96SY0	H3BRY6;B4DVT3;B4DJL6;Q96SY0	von Willebrand factor A domain-containing protein 9	VWA9		468;482;554;518
0	0.126419	-0.633041	-0.536327	-0.726547	-0.628002	0.232435	0.62628	0.753262	0.37225	catalytic activity;citrate (Si)-synthase activity;transferase activity;transferase activity, transferring acyl groups;transferase activity, transferring acyl groups, acyl groups converted into alkyl on transfer	carbohydrate metabolic process;catabolic process;cellular metabolic process;cellular process;cofactor metabolic process;metabolic process;primary metabolic process;small molecule metabolic process	cell part;extracellular organelle;intracellular membrane-bounded organelle;intracellular organelle;mitochondrion;nucleus;organelle;vesicle	Citrate cycle (TCA cycle);Glyoxylate and dicarboxylate metabolism		21	21	19	56.5	56.5	53.6	50.431	0	140.74	10277000000	96	9	6	12	5	6	7	8	11	8	8	16	B4DJV2;O75390;A0A0C4DGI3;F8VRI6;F8VPA1;F8VPF9;F8W1S4;F8W4S1;H0YH82;F8VRP1;F8VX68;H0YIC4;F8VZK9;F8VX07;F8VWQ5;F8VR34;F8VTT8;F8W642;F8W0J2;F8VU34	B4DJV2;O75390;A0A0C4DGI3	Citrate synthase;Citrate synthase, mitochondrial	CS		453;466;400;140;144;140;157;178;190;117;120;123;80;114;132;146;149;66;75;142
-0.439856	-0.203585	-0.176088	0	0.094944	0.122812	0.0226269	0.368914	-0.268929	0.199823	binding;carboxylic acid transmembrane transporter activity;dicarboxylic acid transmembrane transporter activity;nucleic acid binding;organic acid transmembrane transporter activity;RNA binding;structural constituent of ribosome;structural molecule activity;substrate-specific transmembrane transporter activity;substrate-specific transporter activity;transmembrane transporter activity;transporter a…	alcohol metabolic process;amine metabolic process;biological regulation;biosynthetic process;carbohydrate metabolic process;catabolic process;cellular amino acid metabolic process;cellular component disassembly;cellular component organization;cellular ketone metabolic process;cellular metabolic process;cellular nitrogen compound metabolic process;cellular process;establishment of localization;ion…	cell part;intracellular membrane-bounded organelle;intracellular non-membrane-bounded organelle;intracellular organelle;macromolecular complex;membrane;mitochondrion;nucleus;organelle;ribonucleoprotein complex;ribosome	Proximal tubule bicarbonate reclamation		10	10	10	28.3	28.3	28.3	48.099	0	25.845	483900000	32	5	3	6	4	0	3	1	1	4	1	4	B4DLN1;Q9UBX3;F6RGN5;I3L1E8;P52815	B4DLN1;Q9UBX3	Mitochondrial dicarboxylate carrier	SLC25A10		442;287;406;113;198
0.0716619	0.62114	-0.328122	-0.407617	-0.0716619	-2.64811	-0.759263	-0.635462	-0.990556	-0.474489	binding;ribonucleoprotein binding;ribosome binding	biological regulation;cell growth;cellular component organization;cellular metabolic process;cellular process;endoplasmic reticulum organization;establishment of localization;growth;immune system process;macromolecule metabolic process;metabolic process;organelle organization;primary metabolic process;protein metabolic process;protein targeting;protein transport;response to chemical stimulus;resp…	cell part;cytosol;endoplasmic reticulum;intracellular membrane-bounded organelle;intracellular organelle;membrane;organelle	Phagosome;Protein export;Protein processing in endoplasmic reticulum;Vibrio cholerae infection		3	3	3	12.7	12.7	12.7	52.949	0	11.598	29373000	8	2	1	3	0	0	0	0	0	0	0	2	B4DR61;P61619	B4DR61;P61619	Protein transport protein Sec61 subunit alpha isoform 1	SEC61A1		482;476
-0.338911	0.0582809	0.0617237	-0.122295	0.703419	-2.42806	-0.715941	-0.703881	-0.632697	-0.512426	adenyl nucleotide binding;adenyl ribonucleotide binding;ATP binding;binding;catalytic activity;cation binding;ion binding;kinase activity;metal ion binding;nucleotide binding;phosphotransferase activity, alcohol group as acceptor;protein kinase activity;protein serine/threonine kinase activity;purine nucleotide binding;purine ribonucleoside triphosphate binding;purine ribonucleotide binding;ribon…	biological regulation;cell death;cellular component disassembly;cellular component organization;cellular metabolic process;cellular process;death;macromolecule metabolic process;macromolecule modification;metabolic process;phosphorus metabolic process;primary metabolic process;protein metabolic process;protein modification process;protein phosphorylation;regulation of cell cycle;regulation of mit…	cell part;cytoplasm;cytosol;extracellular organelle;intracellular membrane-bounded organelle;intracellular non-membrane-bounded organelle;intracellular organelle;membrane;nucleolus;nucleoplasm;nucleus;organelle;vesicle		S_TKc	6	2	2	15.7	8.1	8.1	40.781	0	6.0526	28348000	6	0	2	1	2	0	0	0	0	0	1	0	H0Y630;B4DR80;Q9Y6E0;Q5JV98;Q5JV99	H0Y630;B4DR80;Q9Y6E0;Q5JV98;Q5JV99	Serine/threonine-protein kinase 24;Serine/threonine-protein kinase 24 36 kDa subunit;Serine/threonine-protein kinase 24 12 kDa subunit	STK24		369;412;443;209;142
0.203919	0.487803	0.204856	-0.329875	-0.581109	-2.57035	-0.18756	0.262111	0.0686941	-0.0799112	catalytic activity;phosphorylase activity;purine-nucleoside phosphorylase activity;S-methyl-5-thioadenosine phosphorylase activity;transferase activity;transferase activity, transferring glycosyl groups;transferase activity, transferring hexosyl groups;transferase activity, transferring pentosyl groups	amine metabolic process;biosynthetic process;cellular amino acid metabolic process;cellular ketone metabolic process;cellular metabolic compound salvage;cellular metabolic process;cellular nitrogen compound metabolic process;cellular process;heterocycle metabolic process;metabolic process;nitrogen compound metabolic process;nucleobase-containing compound metabolic process;nucleobase-containing sm…	cell part;cytoplasm;cytosol;extracellular organelle;intracellular membrane-bounded organelle;intracellular organelle;nucleus;organelle;vesicle	Cysteine and methionine metabolism		6	6	6	32.3	32.3	32.3	33.186	0	30.384	326960000	21	3	4	2	1	0	1	2	2	2	1	3	B4DUC8;Q13126;J3QSB7;F2Z2F3;F8WES2;A0A2R8Y4K0;J3KRN1	B4DUC8;Q13126;J3QSB7;F2Z2F3	S-methyl-5-thioadenosine phosphorylase;Purine nucleoside phosphorylase	MTAP		300;283;242;143;50;55;112
0.723746	0.0735044	-0.639028	-0.0735044	-0.822127	-2.86272	-0.872229	-0.659034	-0.870922	-0.53371		cellular metabolic process;cellular process;macromolecule metabolic process;metabolic process;primary metabolic process;protein folding;protein metabolic process	cell part;cytoplasm;intracellular membrane-bounded organelle;intracellular organelle;macromolecular complex;nucleus;organelle;protein complex			2	2	2	18.2	18.2	18.2	22.254	0	15.27	105990000	5	1	0	2	0	0	0	0	0	0	0	2	B4DWR3;P61758	B4DWR3;P61758	Prefoldin subunit 3	VBP1		192;197
-0.407791	0	0.275143	0.343561	0.408009	-0.828295	-0.457399	0.160099	-0.315332	-0.317608	adenyl nucleotide binding;adenyl ribonucleotide binding;ATP binding;binding;catalytic activity;DNA binding;double-stranded RNA binding;nucleic acid binding;nucleotide binding;purine nucleotide binding;purine ribonucleoside triphosphate binding;purine ribonucleotide binding;ribonucleotide binding;RNA binding;transferase activity	biological regulation;biosynthetic process;cellular metabolic process;cellular nitrogen compound metabolic process;cellular process;immune system process;macromolecule metabolic process;metabolic process;nitrogen compound metabolic process;nucleobase-containing compound metabolic process;primary metabolic process;response to stimulus;RNA metabolic process	cell part;cytoplasm;intracellular membrane-bounded organelle;intracellular non-membrane-bounded organelle;intracellular organelle;macromolecular complex;membrane;nucleolus;nucleoplasm;nucleus;organelle;ribonucleoprotein complex		DZF	21	21	21	77.6	77.6	77.6	38.91	0	266.7	6073600000	176	19	21	22	20	7	13	10	11	15	20	18	B4DY09;Q12905;X6R6Z1;A0A0A0MRL0	B4DY09;Q12905	Interleukin enhancer-binding factor 2	ILF2		352;390;115;150
0.393231	0.103209	-0.00875568	-0.291167	-0.471955	-2.38466	-0.15433	-0.872622	-0.77707	0.00875568	adenyl nucleotide binding;adenyl ribonucleotide binding;ATP binding;binding;catalytic activity;kinase activity;MAP kinase activity;MAP kinase kinase activity;molecular transducer activity;NFAT protein binding;nucleotide binding;phosphotransferase activity, alcohol group as acceptor;protein binding;protein kinase activity;protein serine/threonine kinase activity;protein serine/threonine/tyrosine k…	aging;alcohol metabolic process;anatomical structure development;anatomical structure formation involved in morphogenesis;anatomical structure morphogenesis;biological adhesion;biological regulation;biosynthetic process;carbohydrate metabolic process;cell activation;cell adhesion;cell death;cell differentiation;cell morphogenesis;cellular component morphogenesis;cellular component movement;cellul…	cell part;cytoplasm;cytosol;extracellular organelle;intracellular membrane-bounded organelle;intracellular organelle;mitochondrion;nucleoplasm;nucleus;organelle;vesicle	Amyotrophic lateral sclerosis (ALS);Chagas disease (American trypanosomiasis);Epithelial cell signaling in Helicobacter pylori infection;Fc epsilon RI signaling pathway;GnRH signaling pathway;Hepatitis C;ko05152;Leishmaniasis;Leukocyte transendothelial migration;MAPK signaling pathway;MAPK signaling pathway - yeast;Neurotrophin signaling pathway;NOD-like receptor signaling pathway;Osteoclast diff…	S_TKc	4	4	4	18	18	18	32.357	0	7.9437	82935000	9	2	0	1	1	0	0	0	0	0	1	4	B4E0K5;Q16539;E7EX54;B5TY33;H7C4E2	B4E0K5;Q16539;E7EX54;B5TY33	Mitogen-activated protein kinase 14	MAPK14		283;360;132;173;90
-0.15646	0.11014	0.21554	-0.0439491	0.320713	-2.75271	-0.412634	-0.0183983	0.0743122	0.0183983	binding;enzyme binding;GTPase binding;peptide binding;peroxisome matrix targeting signal-1 binding;peroxisome targeting sequence binding;protein binding;protein C-terminus binding;protein N-terminus binding;signal sequence binding;small GTPase binding	anatomical structure development;biological regulation;catabolic process;cell development;cell differentiation;cell motility;cellular component assembly;cellular component movement;cellular component organization;cellular ketone metabolic process;cellular lipid metabolic process;cellular macromolecular complex assembly;cellular membrane organization;cellular metabolic process;cellular process;dev…	cell part;cytoplasm;cytosol;Golgi apparatus;intracellular;intracellular membrane-bounded organelle;intracellular organelle;macromolecular complex;membrane;microbody;mitochondrion;organelle;peroxisome;protein complex	Peroxisome	TPR	7	7	7	16.1	16.1	16.1	73.182	0	22.575	296850000	26	3	3	3	4	0	1	1	2	1	4	4	B4E0T2;P50542;J3KPV0;F5H3X7	B4E0T2;P50542	Peroxisomal targeting signal 1 receptor	PEX5		660;639;410;248
-0.0581608	0.113012	0.180956	-0.00439262	-0.148081	0.472582	0	0.105785	0.299028	-0.0151138	adenyl nucleotide binding;adenyl ribonucleotide binding;ATP binding;binding;catalytic activity;cation binding;identical protein binding;ion binding;kinase activity;magnesium ion binding;metal ion binding;nucleotide binding;phosphotransferase activity, alcohol group as acceptor;protein binding;protein dimerization activity;protein homodimerization activity;protein kinase activity;protein serine/th…	biological regulation;cell death;cellular component assembly;cellular component disassembly;cellular component organization;cellular metabolic process;cellular process;death;macromolecule metabolic process;macromolecule modification;metabolic process;phosphorus metabolic process;primary metabolic process;protein metabolic process;protein modification process;protein phosphorylation;regulation of …	cell part;centrosome;cytoplasm;cytoplasmic membrane-bounded vesicle;cytosol;extracellular organelle;Golgi apparatus;intracellular membrane-bounded organelle;intracellular non-membrane-bounded organelle;intracellular organelle;membrane;microtubule organizing center;nucleoplasm;nucleus;organelle;vesicle		S_TKc	13	13	7	45.4	45.4	31.1	43.867	0	66.316	1141800000	56	3	7	8	6	2	4	3	2	4	6	11	Q8NBY1;B4E0Y9;Q9P289	Q8NBY1;B4E0Y9;Q9P289	Serine/threonine-protein kinase 26	STK26		392;438;416
0.0681782	0.225466	-0.453133	-0.621496	0.442492	-3.4719	-0.173067	-0.619248	-0.79866	-0.502817	binding;catalytic activity;cation binding;cupric reductase activity;ion binding;metal ion binding;oxidoreductase activity;oxidoreductase activity, oxidizing metal ions;oxidoreductase activity, oxidizing metal ions, NAD or NADP as acceptor;transporter activity	biological regulation;cellular component organization;cellular membrane organization;cellular process;endocytosis;establishment of localization;exocytosis;Golgi vesicle transport;homeostatic process;ion transport;membrane invagination;membrane organization;metabolic process;response to chemical stimulus;response to endogenous stimulus;response to stimulus;secretion;transmembrane transport;transpo…	cell part;cytoplasmic membrane-bounded vesicle;cytosol;endosome;intracellular membrane-bounded organelle;intracellular organelle;membrane;organelle;plasma membrane;vesicle	Mineral absorption		3	3	3	12.7	12.7	12.7	45.983	0	8.1051	18909000	15	3	1	1	4	0	2	0	0	1	1	2	B5MC02;Q8NFT2;C9JLP2	B5MC02;Q8NFT2;C9JLP2	Metalloreductase STEAP2	STEAP2		403;490;181
0	0.293125	-0.566316	-0.792685	-0.483761	-2.29773	-0.745093	-0.62152	-0.707441	0.104042		cell death;cellular component organization;cellular process;death;establishment of localization;mitochondrion organization;organelle fission;organelle organization;transport	cell part;membrane			3	3	3	29.4	29.4	29.4	15.556	0	8.6065	64169000	9	2	1	2	0	0	0	0	0	0	1	3	B5MC22;Q9UDX5;F8WEN7;H7C417	B5MC22;Q9UDX5;F8WEN7	Mitochondrial fission process protein 1	MTFP1		143;166;74;338
-0.29637	-0.152348	-0.460257	-0.569868	-0.312479	-1.80051	0.152348	0.41683	0.826973	0.296192	binding;protein binding;protein complex binding	anatomical structure development;biological regulation;cell differentiation;cellular process;developmental process;response to stimulus;signal transduction	cell part;cell surface;extracellular organelle;membrane;organelle;plasma membrane;vesicle		TY	7	7	7	24.9	24.9	24.9	37.893	0	73.077	958700000	58	6	3	7	5	0	6	7	3	7	8	6	B5MCA4;P16422;C9JKY3	B5MCA4;P16422	Epithelial cell adhesion molecule	EPCAM	1	342;314;199
-0.0740051	0	0.197226	0.37586	0.360462	-0.263729	-0.281609	-0.233984	-0.266066	0.0819435	binding;ribonucleoprotein binding	biological regulation;cell proliferation;cellular component organization;cellular localization;cellular metabolic process;cellular nitrogen compound metabolic process;cellular process;localization;macromolecule metabolic process;metabolic process;nitrogen compound metabolic process;nucleobase-containing compound metabolic process;nucleus organization;organelle organization;primary metabolic proce…	cell part;chromosome;cytoplasm;intracellular membrane-bounded organelle;intracellular non-membrane-bounded organelle;intracellular organelle;macromolecular complex;membrane;nucleolus;nucleoplasm;nucleus;organelle;preribosome;protein complex;ribonucleoprotein complex		BRCT	14	14	14	29.2	29.2	29.2	66.077	0	83.397	973910000	70	8	8	11	6	3	7	4	5	8	4	6	B5MCF9;O00541;B3KXD6;H7C267	B5MCF9;O00541;B3KXD6	Pescadillo homolog	PES1		571;588;449;194
-0.0298862	-0.502078	-0.597723	-0.107746	0.0298862	-2.53437	0.354061	-0.782566	-0.698786	-0.625125	lipid transporter activity;substrate-specific transporter activity;transporter activity	biological regulation;biosynthetic process;carbohydrate metabolic process;carbohydrate transport;cellular component organization;cellular membrane organization;cellular metabolic process;cellular process;establishment of localization;lipid transport;macromolecule metabolic process;macromolecule modification;membrane organization;metabolic process;oligosaccharide metabolic process;peptidyl-amino a…	cell part;membrane	N-Glycan biosynthesis		3	3	3	6.6	6.6	6.6	55.835	0	4.3689	63130000	5	0	0	1	1	0	1	0	0	0	0	2	B5MDE0;Q96AA3;C9JP01	B5MDE0;Q96AA3;C9JP01	Protein RFT1 homolog	RFT1		502;541;291
-0.347927	0.253202	-0.974583	-0.406294	-0.984294	-2.30684	-0.0254192	0.413591	0.520214	0.0446358						5	5	5	17.8	17.8	17.8	42.668	0	7.8792	108280000	19	3	1	3	1	0	1	1	1	1	3	4	B5MDU6;Q9H6V9;C9JHU6;C9JUM0;B5MCU4;A0A0A0MSH6;B4DRG3;B5MCE2;D3YTH1	B5MDU6;Q9H6V9;C9JHU6;C9JUM0;B5MCU4;A0A0A0MSH6	UPF0554 protein C2orf43	LDAH;C2orf43		370;325;130;159;240;283;166;146;156
-0.0908585	0.157232	0	-0.121767	0.63269	-1.95306	-0.122274	-0.861613	-0.135447	0.419268	protein transporter activity;substrate-specific transporter activity;transporter activity	biosynthetic process;carbohydrate metabolic process;cellular component organization;cellular metabolic process;cellular process;establishment of localization;Golgi organization;Golgi vesicle transport;macromolecule metabolic process;macromolecule modification;metabolic process;oligosaccharide metabolic process;organelle organization;primary metabolic process;protein glycosylation;protein metaboli…	cell part;cytosol;macromolecular complex;membrane;protein complex			4	4	4	11.9	11.9	11.9	76.078	0	14.838	168030000	16	2	1	1	3	0	1	0	0	3	3	2	B7Z2Y2;Q14746	B7Z2Y2;Q14746	Conserved oligomeric Golgi complex subunit 2	COG2		679;738
0	0.128696	0.332008	0.111694	-0.135012	-0.0402756	-0.264257	0.0836105	-0.749882	-0.597902	activating transcription factor binding;beta-catenin binding;bHLH transcription factor binding;binding;cation binding;chromatin binding;chromatin DNA binding;core promoter proximal region DNA binding;core promoter proximal region sequence-specific DNA binding;co-SMAD binding;cytokine receptor binding;DNA binding;double-stranded DNA binding;enhancer binding;enzyme binding;identical protein binding…	anatomical structure development;anatomical structure formation involved in morphogenesis;anatomical structure morphogenesis;biological regulation;biosynthetic process;cell activation;cell development;cell differentiation;cell junction organization;cellular component assembly;cellular component organization;cellular macromolecular complex assembly;cellular metabolic process;cellular nitrogen comp…	cell part;cytoplasm;cytosol;intracellular;intracellular membrane-bounded organelle;intracellular organelle;macromolecular complex;membrane;nucleoplasm;nucleus;organelle;plasma membrane;protein complex;receptor complex;transcription factor complex	Adherens junction;Cell cycle;Chagas disease (American trypanosomiasis);Colorectal cancer;Endocytosis;Pancreatic cancer;Pathways in cancer;TGF-beta signaling pathway;Wnt signaling pathway	DWA;DWB	3	3	3	17.1	17.1	17.1	24.494	0	8.3124	112020000	17	2	2	4	2	0	1	1	0	1	2	2	K7EJX0;B7Z5N5;Q15796;H0YMP2;H0YL71;K7ESI8;K7EL92;H3BP09;K7ERC7;H3BVD1;P84022;O15198	K7EJX0;B7Z5N5;Q15796	Mothers against decapentaplegic homolog;Mothers against decapentaplegic homolog 2	SMAD2		217;431;467;63;92;108;109;114;137;213;425;467
-0.0215521	-0.0705423	0.415364	0.0215521	0.739129	1.54704	-0.316209	0.492188	-0.0713663	-0.576192	adenyl nucleotide binding;adenyl ribonucleotide binding;ATP binding;ATPase activity;ATPase activity, coupled;ATP-dependent helicase activity;ATP-dependent RNA helicase activity;binding;catalytic activity;helicase activity;hydrolase activity;hydrolase activity, acting on acid anhydrides;hydrolase activity, acting on acid anhydrides, in phosphorus-containing anhydrides;nucleic acid binding;nucleosi…	cellular metabolic process;cellular nitrogen compound metabolic process;cellular process;macromolecule metabolic process;metabolic process;nitrogen compound metabolic process;nucleobase-containing compound metabolic process;primary metabolic process;RNA metabolic process	cell part;cytoplasm;intracellular non-membrane-bounded organelle;intracellular organelle;nucleolus;organelle		DEXDc;HELICc	5	5	5	7.8	7.8	7.8	86.604	0	10.205	124150000	18	2	2	2	3	1	1	2	1	0	1	3	B7Z6D5;Q96GQ7;A0A087X059;A0A087WYH5	B7Z6D5;Q96GQ7	Probable ATP-dependent RNA helicase DDX27	DDX27		765;796;275;169
0.0951099	0.511265	0	-0.182896	-0.610145	-2.38302	0.173237	-0.0459194	-0.627714	-0.576721	binding;enzyme binding;GTPase binding;protein binding;Ran GTPase binding;Ras GTPase binding;R-SMAD binding;SMAD binding;small GTPase binding	establishment of localization;protein transport;transport	cell part;cytoplasm;intracellular membrane-bounded organelle;intracellular organelle;nucleoplasm;nucleus;organelle		RanBD	2	2	2	6.9	6.9	6.9	52.894	0	6.415	92603000	7	2	1	1	0	0	1	0	0	0	1	1	B7Z7F3;Q9H6Z4;K7ENJ2;K7EID7;K7ENB9;K7EPW1;K7EN31	B7Z7F3;Q9H6Z4;K7ENJ2;K7EID7;K7ENB9;K7EPW1;K7EN31	Ran-binding protein 3	RANBP3		494;567;62;73;74;108;171
0	0.0802097	-0.0274258	-0.683565	-0.807192	-0.170479	0.240376	0.600723	0.655334	0.0123844	acyl-CoA dehydrogenase activity;binding;catalytic activity;coenzyme binding;cofactor binding;flavin adenine dinucleotide binding;identical protein binding;medium-chain-acyl-CoA dehydrogenase activity;oxidoreductase activity;oxidoreductase activity, acting on the CH-CH group of donors;protein binding	amine metabolic process;anatomical structure development;biological regulation;biosynthetic process;carbohydrate metabolic process;catabolic process;cell differentiation;cellular amino acid metabolic process;cellular ketone metabolic process;cellular lipid metabolic process;cellular metabolic process;cellular nitrogen compound metabolic process;cellular process;developmental process;energy reserv…	cell part;cell projection;extracellular organelle;intracellular membrane-bounded organelle;intracellular organelle;mitochondrion;neuron projection;nucleus;organelle;vesicle	beta-Alanine metabolism;Fatty acid metabolism;PPAR signaling pathway;Propanoate metabolism;Valine, leucine and isoleucine degradation		14	14	14	42.6	42.6	42.6	42.426	0	140.66	1591700000	85	9	8	7	4	5	9	10	8	9	8	8	B7Z9I1;Q5T4U5;P11310;E9PJM9;H0YDT5;E9PRX4	B7Z9I1;Q5T4U5;P11310	Medium-chain specific acyl-CoA dehydrogenase, mitochondrial	ACADM		385;454;421;104;67;76
-0.0899334	0.0361156	0.0791397	-0.0361156	-0.490833	-3.15088	-0.180737	0.426571	0.186571	-0.0515785			cell part;cytoplasm;intracellular membrane-bounded organelle;intracellular organelle;nucleoplasm;nucleus;organelle	Endocytosis	BAR;SH3	7	7	6	26.2	26.2	24.2	44.361	0	72.276	163740000	34	5	3	8	3	0	2	1	1	3	3	5	B7ZC38;Q9NR46;B7ZC39;F8WFB9;G5E9J1	B7ZC38;Q9NR46;B7ZC39	Endophilin-B2	SH3GLB2		400;395;374;127;24
-0.0323277	0.0860443	-0.194263	-0.164934	0.0496635	-2.25656	-0.223001	0.160925	0.0323277	-0.215017	1-phosphatidylinositol binding;apolipoprotein A-I binding;apolipoprotein binding;binding;cargo receptor activity;high-density lipoprotein particle binding;high-density lipoprotein particle receptor activity;lipid binding;lipopolysaccharide binding;lipopolysaccharide receptor activity;lipoprotein particle binding;lipoprotein particle receptor activity;low-density lipoprotein particle binding;molec…	alcohol metabolic process;biological adhesion;biological regulation;biosynthetic process;carbohydrate transport;catabolic process;cell adhesion;cell motility;cell proliferation;cell recognition;cellular component movement;cellular component organization;cellular membrane organization;cellular metabolic process;cellular process;detection of stimulus;endocytosis;establishment of localization;homeos…	cell part;cell surface;extracellular organelle;membrane;organelle;plasma membrane;vesicle	Bile secretion;Fat digestion and absorption;Hepatitis C;Phagosome;Vitamin digestion and absorption		7	7	7	15.2	15.2	15.2	53.847	0	17.806	1242100000	36	3	4	4	3	0	3	3	4	3	6	3	B7ZKQ9;F5H4X0;Q8WTV0;F5H5E8	B7ZKQ9;F5H4X0;Q8WTV0	Scavenger receptor class B member 1	SCARB1	1	481;499;552;146
0.0104332	0	0.274746	-0.0727501	-0.172668	-2.23159	-0.163095	0.30554	0.242332	-0.437283		cellular component assembly;cellular component organization;macromolecular complex assembly;protein complex assembly	cell part;extracellular organelle;membrane;organelle;plasma membrane;vesicle		GuKc;L27;PDZ;SH3	23	23	19	55.6	55.6	50.7	48.757	0	69.772	2245500000	85	9	11	10	6	0	8	6	8	6	7	14	B8ZZG1;Q9NZW5;C9J4Q3;C9JGI8;REV__Q8N884	B8ZZG1;Q9NZW5;C9J4Q3	MAGUK p55 subfamily member 6	MPP6		428;540;307;217;522
-0.216737	-0.169772	-0.223262	-0.0903349	-0.923118	-0.278543	0.0903349	0.192098	0.208539	0.341039	acid-amino acid ligase activity;binding;catalytic activity;enzyme binding;ligase activity;ligase activity, forming carbon-nitrogen bonds;protein binding;small conjugating protein ligase activity;SUMO ligase activity;transcription factor binding;ubiquitin protein ligase binding	anatomical structure development;biological regulation;cellular component organization;cellular localization;cellular metabolic process;cellular nitrogen compound metabolic process;cellular process;developmental process;DNA metabolic process;DNA repair;localization;macromolecule metabolic process;macromolecule modification;metabolic process;nitrogen compound metabolic process;nucleobase-containin…	cell part;cell projection;cytoplasm;intracellular membrane-bounded organelle;intracellular non-membrane-bounded organelle;intracellular organelle;macromolecular complex;membrane;neuron projection;nuclear pore;nucleolus;nucleoplasm;nucleus;organelle;protein complex;synapse	RNA transport	UBQ	3	3	3	18.5	18.5	18.5	16.645	0	6.1177	590890000	13	1	1	2	1	0	1	1	1	1	3	1	B8ZZN6;P63165;B8ZZJ0;B8ZZ67;B9A032	B8ZZN6;P63165;B8ZZJ0;B8ZZ67;B9A032	Small ubiquitin-related modifier 1	SUMO1		146;101;58;62;77
-0.0786839	-0.121523	-0.0821991	0	-0.0773773	0.190018	0.234859	0.814754	0.726507	0.508978	binding;enzyme binding;nucleic acid binding;protein binding;RNA binding;translation elongation factor activity;translation factor activity, nucleic acid binding;ubiquitin protein ligase binding	biological regulation;biosynthetic process;cellular component assembly;cellular component organization;cellular metabolic process;cellular nitrogen compound metabolic process;cellular process;macromolecular complex assembly;macromolecule metabolic process;macromolecule modification;metabolic process;nitrogen compound metabolic process;nucleobase-containing compound metabolic process;primary metab…	cell part;cytosol;extracellular organelle;macromolecular complex;nucleoplasm;organelle;protein complex;transcription elongation factor complex;ubiquitin ligase complex;vesicle	Pathways in cancer;Renal cell carcinoma;Ubiquitin mediated proteolysis	UBQ	4	4	4	43.4	43.4	43.4	12.527	0	11.921	263990000	23	3	1	3	3	2	2	2	2	2	2	1	B8ZZU8;I3L0M9;Q15370;A0A0B4J296	B8ZZU8;I3L0M9;Q15370;A0A0B4J296	Transcription elongation factor B polypeptide 2	TCEB2		113;140;118;66
0.560932	0.331367	-0.564449	-0.701317	-1.05898	-2.47039	0.250443	0.114365	-0.851612	-0.114365	3-hydroxyisobutyryl-CoA hydrolase activity;catalytic activity;CoA hydrolase activity;hydrolase activity;hydrolase activity, acting on ester bonds;thiolester hydrolase activity	amine metabolic process;catabolic process;cellular amino acid metabolic process;cellular ketone metabolic process;cellular metabolic process;cellular nitrogen compound metabolic process;cellular process;metabolic process;nitrogen compound metabolic process;organic acid metabolic process;primary metabolic process;small molecule metabolic process	cell part;extracellular organelle;organelle;vesicle	beta-Alanine metabolism;Propanoate metabolism;Valine, leucine and isoleucine degradation		3	3	3	11.7	11.7	11.7	30.053	0	4.5371	54619000	5	2	0	1	0	0	0	0	0	0	0	2	B8ZZZ0;Q6NVY1;H7C400;H7BYI7	B8ZZZ0;Q6NVY1	3-hydroxyisobutyryl-CoA hydrolase, mitochondrial	HIBCH		273;386;52;69
-0.616948	-0.189081	-0.565241	-0.568161	-0.894632	0.421745	-0.932765	-0.724497	0.189081	0.346794		biological regulation;cellular homeostasis;cellular ion homeostasis;cellular process;homeostatic process;response to abiotic stimulus;response to stimulus;response to stress	cell part;intracellular membrane-bounded organelle;intracellular organelle;membrane;mitochondrion;organelle			5	5	5	12.4	12.4	12.4	78.973	0	11.195	62717000	12	2	3	1	2	1	2	1	0	0	0	0	B9A067;Q16891;H7C463;C9J406;A0A087WYS0;D6RAW4	B9A067;Q16891;H7C463;C9J406	MICOS complex subunit MIC60	IMMT		711;758;613;659;372;147
0.434265	0.542988	0.431759	0.471691	0.311892	-0.418991	-0.422897	-1.05368	-0.668499	-0.617746	binding;nucleic acid binding;nucleotide binding				RRM	4	4	4	6	6	6	102.7	0	9.6191	150180000	15	2	3	3	3	0	0	0	0	1	1	2	B9ZVT1;Q8IXT5;E5RJW8;E5RHG1;E5RJ83;E5RJV8	B9ZVT1;Q8IXT5	RNA-binding protein 12B	RBM12B		881;1001;82;122;143;149
-0.760501	-0.455814	-0.534809	-0.475838	-0.80868	-1.5954	0.154829	-0.723524	-0.536064	0.32547	binding;catalytic activity;cation binding;DNA binding;endonuclease activity;endoribonuclease activity;hydrolase activity;hydrolase activity, acting on ester bonds;ion binding;metal ion binding;nuclease activity;nucleic acid binding;protein transporter activity;ribonuclease activity;sequence-specific DNA binding;single-stranded DNA binding;structure-specific DNA binding;substrate-specific transpor…	cell differentiation;cellular process;developmental process;establishment of localization;macromolecule metabolic process;metabolic process;multicellular organismal development;multicellular organismal process;protein transport;transport	cell part;cytoplasm;cytosol;Golgi apparatus;intracellular membrane-bounded organelle;intracellular organelle;nucleus;organelle			3	3	3	27.4	27.4	27.4	21.427	0	11.291	127110000	9	0	1	2	1	0	2	0	0	1	1	1	C4P0D6;C4P0D8;Q99598;C4P0D4;Q5VVQ1	C4P0D6;C4P0D8;Q99598;C4P0D4;Q5VVQ1	Translin-associated protein X	DISC1;TSNAX		186;188;290;138;163
-0.384039	-0.251423	0.255692	0.171139	0.550804	-2.30084	-0.888542	-0.643114	-0.772584	-0.572869	binding;mRNA binding;nucleic acid binding;nucleotide binding;RNA binding	biological regulation;cellular metabolic process;cellular nitrogen compound metabolic process;cellular process;macromolecule metabolic process;metabolic process;mRNA metabolic process;mRNA processing;nitrogen compound metabolic process;nucleobase-containing compound metabolic process;primary metabolic process;RNA metabolic process;RNA processing	cell part;intracellular membrane-bounded organelle;intracellular organelle;macromolecular complex;membrane;nucleus;organelle;ribonucleoprotein complex		RRM	8	7	7	24	22.7	22.7	59.663	0	21.698	110860000	21	2	4	5	5	0	0	0	0	0	2	3	C9IYN3;D6W592;Q8WVV9;B7WPG3;H7C464;H7BXH8;C9JJZ7	C9IYN3;D6W592;Q8WVV9;B7WPG3	Heterogeneous nuclear ribonucleoprotein L-like	HNRNPLL;HNRPLL		537;542;542;508;133;217;149
-0.701523	0.0151501	0.00801468	-0.0442543	-0.00801468	-3.12105	-0.670988	-0.794588	-0.830586	-0.594626	binding;cation binding;enzyme binding;ion binding;kinase binding;metal ion binding;protein binding;protein kinase binding;transition metal ion binding;zinc ion binding	cell division;cellular component organization;cellular metabolic process;cellular process;macromolecule metabolic process;macromolecule modification;metabolic process;mitosis;nuclear division;organelle fission;organelle organization;primary metabolic process;protein metabolic process;protein modification by small protein conjugation or removal;protein modification process	cell part;intracellular membrane-bounded organelle;intracellular organelle;membrane;nucleus;organelle			5	5	5	18.1	18.1	18.1	50.562	0	15.834	57546000	15	2	2	2	1	0	2	2	1	1	1	1	C9J0I9;Q86WB0;F8WAU5	C9J0I9;Q86WB0	Nuclear-interacting partner of ALK	ZC3HC1		459;502;95
-0.0414333	-0.0338516	0.409895	0.427448	0.329447	0.686831	-0.0486069	-0.229343	0	0.0769901	binding;catalytic activity;cation binding;chromatin binding;DNA binding;DNA-directed RNA polymerase activity;ion binding;metal ion binding;nucleic acid binding;nucleoside binding;nucleotidyltransferase activity;ribonucleoside binding;RNA polymerase activity;transferase activity;transferase activity, transferring phosphorus-containing groups	biological regulation;biosynthetic process;cellular metabolic process;cellular nitrogen compound metabolic process;cellular process;developmental process;DNA metabolic process;DNA repair;macromolecule metabolic process;metabolic process;mRNA metabolic process;mRNA processing;nitrogen compound metabolic process;nucleobase-containing compound metabolic process;primary metabolic process;response to …	cell part;intracellular membrane-bounded organelle;intracellular organelle;macromolecular complex;membrane;nucleoplasm;nucleus;organelle;protein complex;RNA polymerase complex	Huntington's disease;Purine metabolism;Pyrimidine metabolism;RNA polymerase		23	23	23	27.8	27.8	27.8	133.06	0	106.21	765030000	89	8	11	13	11	5	7	4	5	5	11	9	C9J2Y9;P30876;A0A1W2PPT5;C9J4M6	C9J2Y9;P30876;A0A1W2PPT5;C9J4M6	DNA-directed RNA polymerase;DNA-directed RNA polymerase II subunit RPB2	POLR2B		1167;1174;1099;1067
-0.121908	0.121908	-0.198759	-0.381773	-0.176588	-2.1928	0.412865	0.348267	-0.518393	0.150238	binding;carnitine O-acyltransferase activity;carnitine O-octanoyltransferase activity;catalytic activity;O-acyltransferase activity;octanoyltransferase activity;O-octanoyltransferase activity;protein binding;receptor binding;transferase activity;transferase activity, transferring acyl groups;transferase activity, transferring acyl groups other than amino-acyl groups	amine metabolic process;catabolic process;cellular amino acid metabolic process;cellular ketone metabolic process;cellular lipid metabolic process;cellular metabolic process;cellular nitrogen compound metabolic process;cellular process;cofactor metabolic process;establishment of localization;generation of precursor metabolites and energy;heterocycle metabolic process;lipid metabolic process;lipid…	cell part;intracellular membrane-bounded organelle;intracellular organelle;microbody;mitochondrion;organelle;peroxisome	Peroxisome		5	5	5	13.1	13.1	13.1	65.883	0	20.259	113930000	27	4	3	5	2	0	2	1	0	1	6	3	C9J3D7;Q9UKG9	C9J3D7;Q9UKG9	Peroxisomal carnitine O-octanoyltransferase	CROT		574;612
0	0.600777	0.630886	0.616049	0.399139	-0.23185	-0.480091	-0.528545	-0.283831	-0.036396	binding;catalytic activity;cation binding;ion binding;ligase activity;metal ion binding;transition metal ion binding;zinc ion binding	cellular metabolic process;cellular process;macromolecule metabolic process;macromolecule modification;metabolic process;primary metabolic process;protein metabolic process;protein modification by small protein conjugation or removal;protein modification process	cell part;intracellular		RING;ZnF_C3H1	7	7	7	26.3	26.3	26.3	46.68	0	25.767	294670000	30	5	5	6	3	0	0	0	1	1	5	4	C9J494;Q9H000	C9J494;Q9H000	Probable E3 ubiquitin-protein ligase makorin-2	MKRN2		414;416
-1.12342	-0.822706	-1.02532	-0.539629	0	1.30607	0.39484	0.547123	0.572868	0.448267	binding;cation binding;ion binding;metal ion binding;structural constituent of ribosome;structural molecule activity	biosynthetic process;catabolic process;cellular component disassembly;cellular component organization;cellular metabolic process;cellular nitrogen compound metabolic process;cellular process;establishment of localization;macromolecule metabolic process;metabolic process;mRNA metabolic process;nitrogen compound metabolic process;nucleobase-containing compound metabolic process;primary metabolic pr…	cell part;cytosol;extracellular organelle;intracellular membrane-bounded organelle;intracellular non-membrane-bounded organelle;intracellular organelle;macromolecular complex;nucleus;organelle;ribonucleoprotein complex;ribosome;vesicle	Ribosome		3	3	3	51.5	51.5	51.5	7.624	0	54.244	342550000	24	1	2	3	2	3	2	3	2	2	3	1	C9J4Z3;P61513;G5E9R3;M0R0A1;Q6P4E4;E9PEL3;M0R2L6;A6NKH3	C9J4Z3;P61513;G5E9R3;M0R0A1;Q6P4E4;E9PEL3;M0R2L6	60S ribosomal protein L37a	RPL37A	3	68;92;58;60;72;75;88;93
0.663143	0.68837	0.260859	-0.497448	-0.83592	-2.62633	-0.129139	-0.393343	-0.861078	0.129139		biological regulation	cell part;intracellular membrane-bounded organelle;intracellular organelle;membrane;mitochondrion;organelle			2	2	2	14	14	14	20.87	0	8.1559	91135000	9	1	1	1	0	0	2	0	1	1	0	2	H7BXQ8;C9J5N7;Q8N2F6;A0A0J9YY38;A0A0J9YXV5;A0A0J9YWR7;H7C2M7;A0A0J9YXE4	H7BXQ8;C9J5N7;Q8N2F6;A0A0J9YY38;A0A0J9YXV5;A0A0J9YWR7;H7C2M7;A0A0J9YXE4	Armadillo repeat-containing protein 10	ARMC10		193;233;343;62;91;153;185;212
-0.431602	-0.412966	-0.0636044	-0.13662	0.24502	-2.62663	-0.190266	0.47278	0.251299	0.0636044	adenyl nucleotide binding;adenyl ribonucleotide binding;ATP binding;binding;catalytic activity;enzyme binding;growth factor binding;hormone binding;identical protein binding;insulin binding;insulin receptor binding;insulin receptor substrate binding;insulin-like growth factor binding;insulin-like growth factor I binding;insulin-like growth factor-activated receptor activity;kinase activity;kinase…	anatomical structure development;anatomical structure morphogenesis;biological regulation;cellular component assembly;cellular component morphogenesis;cellular component organization;cellular metabolic process;cellular process;cytoskeleton organization;developmental process;establishment or maintenance of cell polarity;immune system process;macromolecular complex assembly;macromolecule metabolic …	cell part;cell projection;intracellular membrane-bounded organelle;intracellular organelle;macromolecular complex;membrane;neuron projection;organelle;plasma membrane;protein complex;receptor complex	Adherens junction;Endocytosis;Focal adhesion;Glioma;Long-term depression;Melanoma;Oocyte meiosis;Pathways in cancer;Progesterone-mediated oocyte maturation;Prostate cancer;Regulation of actin cytoskeleton	FN3;FU;TyrKc	21	21	20	21.2	21.2	20.5	154.79	0	67.142	1079200000	81	7	3	13	9	0	8	6	6	6	13	10	C9J5X1;P08069;H0YMJ5;H0YNR0;H3BSZ8;P14616	C9J5X1;P08069	Tyrosine-protein kinase receptor;Insulin-like growth factor 1 receptor;Insulin-like growth factor 1 receptor alpha chain;Insulin-like growth factor 1 receptor beta chain	IGF1R	1	1366;1367;190;212;90;1297
-0.0342922	0.481136	0.0342922	-1.04183	-0.628778	-3.38613	-0.0700359	0.158995	0.692348	0.361715	actin binding;actin monomer binding;adenyl nucleotide binding;adenyl-nucleotide exchange factor activity;ATPase regulator activity;binding;cytoskeletal protein binding;enzyme regulator activity;lipid binding;nucleoside-triphosphatase regulator activity;nucleotide binding;phosphatidylinositol binding;phosphatidylinositol-4,5-bisphosphate binding;phospholipid binding;protein binding;purine nucleoti…	biological regulation;cellular component organization;cellular process;cytoskeleton organization;organelle organization;regulation of organelle organization;regulation of protein modification process;regulation of transport	cell part;cytoplasm;cytoskeleton;extracellular organelle;intracellular non-membrane-bounded organelle;intracellular organelle;organelle;vesicle	Regulation of actin cytoskeleton;Shigellosis	PROF	5	5	5	56	56	56	9.7982	0	25.329	325120000	18	3	2	2	0	0	1	1	3	1	1	4	C9J712;P35080;C9J0J7;C9JQ45;G5E9Q6;C9J2N0	C9J712;P35080;C9J0J7;C9JQ45;G5E9Q6;C9J2N0	Profilin-2;Profilin	PFN2		91;140;91;110;188;125
-0.510054	-0.125226	-0.511641	-0.776698	-0.787008	-1.85132	1.22961	-0.549064	-0.695889	0.125226	catalytic activity;transferase activity;transferase activity, transferring glycosyl groups		cell part;membrane			2	2	2	19	19	19	19.42	0.0045382	2.3714	22407000	6	0	1	1	0	0	2	0	0	1	0	1	C9J880;Q68CQ7;C9JNB0;C9JY96;C9JPK4	C9J880;Q68CQ7;C9JNB0;C9JY96;C9JPK4	Glycosyltransferase 8 domain-containing protein 1	GLT8D1	3	174;371;62;63;89
-0.0307865	0.288256	0.0307865	-0.636629	-1.20651	-0.674055	1.23854	0.789886	0.882408	-0.343943	aldehyde dehydrogenase (NAD) activity;binding;catalytic activity;identical protein binding;oxidoreductase activity;oxidoreductase activity, acting on the aldehyde or oxo group of donors;oxidoreductase activity, acting on the aldehyde or oxo group of donors, NAD or NADP as acceptor;protein binding;protein dimerization activity;protein homodimerization activity;succinate-semialdehyde dehydrogenase …	alcohol metabolic process;amine metabolic process;anatomical structure development;biological regulation;carbohydrate metabolic process;catabolic process;cell communication;cell-cell signaling;cellular amino acid metabolic process;cellular component assembly;cellular component organization;cellular ketone metabolic process;cellular lipid metabolic process;cellular metabolic process;cellular nitro…	cell part;intracellular membrane-bounded organelle;intracellular organelle;mitochondrion;organelle	Alanine, aspartate and glutamate metabolism;Butanoate metabolism		7	7	7	21.3	21.3	21.3	53.867	0	24.145	465390000	30	4	3	2	1	1	6	2	3	1	2	5	C9J8Q5;P51649	C9J8Q5;P51649	Succinate-semialdehyde dehydrogenase, mitochondrial	ALDH5A1		507;535
-0.0159435	0.222401	-0.334677	-0.727916	-0.360567	-2.51495	0.0159435	-0.542654	-0.6667	0.0167446						4	1	1	21.2	7.2	7.2	32.136	0	4.5333	52860000	11	4	1	1	2	0	0	0	0	0	1	2	C9JA93	C9JA93		TBC1D15		278
-0.762951	-0.487608	-0.822909	-0.475767	0.124531	0.853497	0	-0.0380878	0.527443	-0.542741					ARM	3	3	3	24.7	24.7	24.7	21.957	0	9.9107	29516000	12	1	0	3	2	0	1	1	0	1	2	1	C9JAA7;G5E9V6;Q8IUR7;C9J8P8;C9JBY2;G5E9V7;H7C5H2;C9J2I1;B7Z637	C9JAA7;G5E9V6;Q8IUR7;C9J8P8;C9JBY2;G5E9V7	Armadillo repeat-containing protein 8	ARMC8		198;399;673;130;227;357;117;352;600
-0.426834	0.214956	-0.735561	0.0568962	0.395544	0.860249	-0.760151	-0.0907345	0.021019	-0.100126		biological regulation;metabolic process	cell part;macromolecular complex;membrane;protein complex			4	4	4	53	53	53	8.8131	0	48.452	254340000	29	3	4	3	3	2	2	0	1	5	3	3	C9JAW5;C9JNU6;Q9Y241	C9JAW5;C9JNU6;Q9Y241	HIG1 domain family member 1A, mitochondrial	HIGD1A		83;96;93
-0.134613	0.149071	0	0.326921	0.260498	-1.28004	-0.0493279	0.0328388	-0.080555	-0.382359	enzyme inhibitor activity;enzyme regulator activity;GTPase inhibitor activity;GTPase regulator activity;nucleoside-triphosphatase regulator activity	biological regulation;cell cycle;cellular metabolic process;cellular process;macromolecule metabolic process;macromolecule modification;metabolic process;primary metabolic process;protein metabolic process;protein modification by small protein conjugation or removal;protein modification process;regulation of protein modification process;response to stimulus;response to stress;signal transduction	cell part;cytoplasm;intracellular membrane-bounded organelle;intracellular organelle;macromolecular complex;nucleus;organelle;protein complex		PINT	13	13	13	34.2	34.2	34.2	53.371	0	54.876	1109500000	50	7	7	7	6	0	3	2	1	4	6	7	C9JFE4;Q13098;A0A096LP07;A0A096LPJ3;A8K070;J3KSA5;J3QLT0;J3KRJ4;J3QQX0;J3QS88;J3KTB0;J3QS84;J3QLE8;J3QL53;J3KRE8	C9JFE4;Q13098;A0A096LP07;A0A096LPJ3;A8K070	COP9 signalosome complex subunit 1	GPS1		471;491;486;490;526;210;168;253;79;134;139;101;166;168;186
0	0.155519	-0.281769	-0.299517	-0.69347	-1.72978	0.229805	0.165108	0.201981	0.201408	binding;cation binding;electron carrier activity;electron transporter, transferring electrons from CoQH2-cytochrome c reductase complex and cytochrome c oxidase complex activity;heme binding;ion binding;iron ion binding;metal ion binding;tetrapyrrole binding;transition metal ion binding	biological regulation;biosynthetic process;catabolic process;cell death;cellular component organization;cellular metabolic process;cellular nitrogen compound metabolic process;cellular process;cellular respiration;death;DNA metabolic process;generation of precursor metabolites and energy;macromolecule metabolic process;metabolic process;mitochondrion organization;nitrogen compound metabolic proce…	cell part;cytosol;intracellular membrane-bounded organelle;intracellular organelle;macromolecular complex;membrane;mitochondrion;nucleus;organelle;protein complex;protein serine/threonine phosphatase complex	Alzheimer's disease;Amyotrophic lateral sclerosis (ALS);Apoptosis;Colorectal cancer;Huntington's disease;ko05152;p53 signaling pathway;Parkinson's disease;Pathways in cancer;Small cell lung cancer;Toxoplasmosis;Viral myocarditis		4	4	3	33.7	33.7	22.8	11.333	0	8.7813	812760000	21	1	3	1	2	0	4	2	1	3	2	2	C9JFR7;P99999	C9JFR7;P99999	Cytochrome c	CYCS		101;105
-0.238724	0	0.311836	0.630535	0.597872	-1.55964	-0.862583	-0.189531	0.0220318	-0.401377		biosynthetic process;cellular component disassembly;cellular component organization;cellular metabolic process;cellular process;macromolecule metabolic process;metabolic process;mitochondrial translation;mitochondrion organization;organelle organization;primary metabolic process;protein metabolic process;translation;translational elongation;translational initiation	cell part;intracellular membrane-bounded organelle;intracellular non-membrane-bounded organelle;intracellular organelle;macromolecular complex;membrane;mitochondrion;organelle;ribonucleoprotein complex;ribosome			8	8	8	39.6	39.6	39.6	26.332	0	72.089	883430000	44	9	6	6	7	0	2	2	3	2	3	4	C9JJ19;P82930	C9JJ19;P82930	28S ribosomal protein S34, mitochondrial	MRPS34		225;218
-0.699633	0.343795	-0.444847	-0.235831	-0.26924	-2.61696	-0.743882	-0.600649	0.235831	-0.546302	molecular transducer activity;signal transducer activity	biological regulation;cellular process;response to stimulus;signal transduction	cell part;cytoplasm;extracellular organelle;organelle;vesicle	Pathways in cancer;Thyroid cancer	PB1	3	3	3	40.8	40.8	40.8	17.731	0	10.378	132900000	15	2	1	2	3	1	0	1	1	1	2	1	C9JUE0;C9JJP5;Q92734;C9JTY3	C9JUE0;C9JJP5;Q92734;C9JTY3	Protein TFG	TFG		157;181;400;128
0.211784	-0.0937271	0.0937271	-0.263086	0.469683	-2.3888	-0.759978	-0.723958	-0.69984	-0.507347		biological adhesion;cell adhesion;cellular process;developmental process;multicellular organismal development;multicellular organismal process	cell part;cytoplasm;intracellular;membrane;nucleoplasm;plasma membrane		ARM	7	7	7	12.9	12.9	12.9	96.827	0	33.012	65453000	20	3	4	3	5	0	1	0	0	0	2	2	C9JJX6;E9PDC3;O00192	C9JJX6;E9PDC3;O00192	Armadillo repeat protein deleted in velo-cardio-facial syndrome	ARVCF		893;956;962
-0.123245	-0.432045	-0.603681	-0.714994	-0.977846	-2.36561	-0.124081	0.268917	0.125725	0.123245		alcohol metabolic process;amine metabolic process;anatomical structure development;anatomical structure morphogenesis;biological regulation;cell differentiation;cell growth;cellular aromatic compound metabolic process;cellular metabolic process;cellular nitrogen compound metabolic process;cellular process;developmental process;growth;metabolic process;nitrogen compound metabolic process;regulatio…	cell part;cell projection;cytosol;extracellular organelle;F-actin capping protein complex;intracellular membrane-bounded organelle;intracellular organelle;macromolecular complex;neuron projection;nucleus;organelle;protein complex;vesicle		ANK	2	2	2	38.5	38.5	38.5	5.7044	0	14.117	124260000	10	2	1	1	1	0	0	1	1	1	1	1	C9JL85;P58546	C9JL85;P58546	Myotrophin	MTPN		52;118
-0.32185	0.696384	0.372963	0.587412	0.874336	-2.78382	-0.619365	-2.35275	-1.33234	-0.785887	binding;catalytic activity;DNA binding;DNA-directed RNA polymerase activity;nucleic acid binding;nucleotidyltransferase activity;RNA polymerase activity;transferase activity;transferase activity, transferring phosphorus-containing groups	biological regulation;biosynthetic process;cellular metabolic process;cellular nitrogen compound metabolic process;cellular process;developmental process;DNA metabolic process;DNA repair;immune system process;macromolecule metabolic process;metabolic process;mRNA metabolic process;mRNA processing;nitrogen compound metabolic process;nucleobase-containing compound metabolic process;primary metaboli…	cell part;cytosol;intracellular membrane-bounded organelle;intracellular organelle;macromolecular complex;nucleoplasm;nucleus;organelle;protein complex;RNA polymerase complex	Cytosolic DNA-sensing pathway;Huntington's disease;Purine metabolism;Pyrimidine metabolism;RNA polymerase	RPOL8c	4	4	4	38.5	38.5	38.5	16.925	0	28.65	136860000	21	4	2	6	3	0	0	0	1	1	2	2	C9JLU1;P52434	C9JLU1;P52434	DNA-directed RNA polymerases I, II, and III subunit RPABC3	POLR2H		148;150
-0.715137	-0.0167236	0.41123	-0.186649	-0.212811	-2.72753	0.0167236	-0.526831	-0.681544	-0.688792	binding;catalytic activity;cis-trans isomerase activity;cyclosporin A binding;drug binding;isomerase activity;peptide binding;peptidyl-prolyl cis-trans isomerase activity	cellular metabolic process;cellular nitrogen compound metabolic process;cellular process;macromolecule metabolic process;macromolecule modification;metabolic process;nitrogen compound metabolic process;nucleobase-containing compound metabolic process;peptidyl-amino acid modification;primary metabolic process;protein folding;protein metabolic process;protein modification process;RNA metabolic proc…	cell part;cytoplasm;intracellular membrane-bounded organelle;intracellular organelle;nucleoplasm;nucleus;organelle			2	2	2	12.2	12.2	12.2	27.409	0	7.1957	39468000	9	1	1	1	2	0	1	0	0	1	1	1	C9JN15;Q13427;C9JT64;C9J679;C9JM79;E9PG73	C9JN15;Q13427;C9JT64;C9J679;C9JM79;E9PG73	Peptidyl-prolyl cis-trans isomerase;Peptidyl-prolyl cis-trans isomerase G	PPIG		246;754;59;104;487;739
-0.83485	-0.492865	-0.604456	-0.11982	0.0675259	0.733688	0.287216	0	0.0458241	0.243734	binding;nucleic acid binding;RNA binding;structural constituent of ribosome;structural molecule activity	anatomical structure development;biological regulation;biosynthetic process;catabolic process;cellular component assembly;cellular component disassembly;cellular component organization;cellular macromolecular complex assembly;cellular metabolic process;cellular nitrogen compound metabolic process;cellular process;developmental process;establishment of localization;locomotion;macromolecular comple…	cell part;cytosol;extracellular organelle;intracellular non-membrane-bounded organelle;intracellular organelle;macromolecular complex;membrane;organelle;ribonucleoprotein complex;ribosome;vesicle	Ribosome	TRASH	6	6	6	43	43	43	14.369	0	20.925	1035400000	22	1	1	2	3	4	5	1	1	1	1	2	C9JXB8;C9JNW5;P83731	C9JXB8;C9JNW5;P83731	60S ribosomal protein L24	RPL24		121;150;157
-0.253672	0.230129	0.0916882	-0.663139	-0.137554	-2.14465	0	-0.870458	0.128616	-0.491327		behavior;behavioral interaction between organisms;biological regulation;cellular process;multi-organism process;response to stimulus;signal transduction	cell part;cytoplasm		WD40	3	3	2	45.2	45.2	28	9.9103	0	7.3385	54897000	10	1	1	1	1	0	1	0	1	1	1	2	C9JPQ6;Q9BYB4	C9JPQ6;Q9BYB4	Guanine nucleotide-binding protein subunit beta-like protein 1	GNB1L		93;327
-0.12669	0	0.66651	0.720911	1.29191	4.55833	-0.219519	-0.137625	-0.182669	-0.11388	acetyl-CoA carboxylase activity;adenyl nucleotide binding;adenyl ribonucleotide binding;ATP binding;binding;catalytic activity;CoA carboxylase activity;ligase activity;ligase activity, forming carbon-carbon bonds;nucleotide binding;propionyl-CoA carboxylase activity;purine nucleotide binding;purine ribonucleoside triphosphate binding;purine ribonucleotide binding;ribonucleotide binding	biosynthetic process;catabolic process;cellular amide metabolic process;cellular ketone metabolic process;cellular lipid metabolic process;cellular metabolic process;cellular nitrogen compound metabolic process;cellular process;cofactor metabolic process;heterocycle metabolic process;lipid metabolic process;metabolic process;nitrogen compound metabolic process;organic acid metabolic process;prima…	acetyl-CoA carboxylase complex;cell part;cytosol;intracellular membrane-bounded organelle;intracellular organelle;macromolecular complex;mitochondrion;organelle;protein complex	Carbon fixation pathways in prokaryotes;Glyoxylate and dicarboxylate metabolism;Propanoate metabolism;Valine, leucine and isoleucine degradation		28	28	28	59.1	59.1	59.1	59.403	0	319.54	3003500000	117	6	8	15	16	30	7	1	1	7	17	9	E9PDR0;C9JQS9;P05166;E7EUY3;E7EX59;E7ETT1;E7ETT4;E9PEC3;F8WBI9;E7ENC1;H7C5C9;C9JVY9;C9JVW9;C9JAW3	E9PDR0;C9JQS9;P05166;E7EUY3;E7EX59;E7ETT1;E7ETT4;E9PEC3;F8WBI9	Propionyl-CoA carboxylase beta chain, mitochondrial	PCCB		550;559;539;516;570;520;482;423;405;303;163;191;133;84
0	-0.525817	0.0972366	0.347841	-0.605376	-2.72935	-0.639218	-0.597878	-0.722044	-0.0784683	binding;catalytic activity;endonuclease activity;endonuclease activity, active with either ribo- or deoxyribonucleic acids and producing 5'-phosphomonoesters;endoribonuclease activity;endoribonuclease activity, producing 5'-phosphomonoesters;hydrolase activity;hydrolase activity, acting on ester bonds;nuclease activity;nucleic acid binding;ribonuclease activity;ribonuclease P activity;tRNA-specif…	cellular metabolic process;cellular nitrogen compound metabolic process;cellular process;macromolecule metabolic process;metabolic process;nitrogen compound metabolic process;nucleobase-containing compound metabolic process;primary metabolic process;RNA metabolic process;RNA processing;tRNA metabolic process;tRNA processing	cell part;intracellular membrane-bounded organelle;intracellular organelle;macromolecular complex;nucleus;organelle;ribonuclease P complex;ribonucleoprotein complex	Ribosome biogenesis in eukaryotes;RNA transport		2	2	2	11.7	11.7	11.7	15.324	0	4.4973	145380000	8	1	1	1	0	0	1	1	0	1	1	1	C9JYM0;O75817	C9JYM0;O75817	Ribonuclease P protein subunit p20	POP7		137;140
-0.0316439	-0.00606251	-0.224933	-0.207261	0.345307	-1.9038	-0.120183	0.00606251	0.150695	0.29563	ankyrin binding;binding;cytoskeletal protein binding;protein binding	anatomical structure development;anatomical structure formation involved in morphogenesis;anatomical structure morphogenesis;biological adhesion;biological regulation;cell adhesion;cell motility;cell recognition;cellular component assembly;cellular component morphogenesis;cellular component movement;cellular component organization;cellular membrane organization;cellular process;developmental proc…	cell part;cell projection;membrane;neuron projection;plasma membrane;synapse	Cell adhesion molecules (CAMs)	FN3;IG;IGc2	20	20	20	28.3	28.3	28.3	133.81	0	102	1674500000	107	9	11	14	13	0	9	4	7	10	18	12	C9JYY6;Q92823;F8W775;A0A087X2B3;C9JH43;C9J8B6;C9JF43	C9JYY6;Q92823;F8W775;A0A087X2B3;C9JH43	Neuronal cell adhesion molecule	NRCAM	1	1211;1304;1299;771;431;106;118
0	-0.0457935	0.13912	0.323502	0.443251	0.261374	-0.117651	-0.0557442	-0.0571766	-0.00461388	binding;cadherin binding;cell adhesion molecule binding;protein binding;receptor binding	anatomical structure development;biological adhesion;biological regulation;biosynthetic process;cell adhesion;cell junction organization;cellular component assembly;cellular component organization;cellular metabolic process;cellular nitrogen compound metabolic process;cellular process;developmental process;macromolecule metabolic process;metabolic process;nitrogen compound metabolic process;nucle…	cell part;cell projection;cytoplasm;cytosol;extracellular organelle;intracellular membrane-bounded organelle;intracellular organelle;membrane;midbody;neuron projection;nucleus;organelle;plasma membrane;site of polarized growth;synapse;vesicle	Adherens junction;Leukocyte transendothelial migration	ARM	24	24	24	36.2	36.2	36.2	104.85	0	260.26	2200100000	128	10	17	20	18	3	10	4	5	8	14	19	C9JZR2;O60716;E9PRE2;H0YC95;E9PKY0;E9PKL1	C9JZR2;O60716	Catenin delta-1	CTNND1		938;968;261;123;126;128
-0.859867	-0.439943	-0.642988	-0.513285	0	2.58889	1.08994	1.66823	2.14172	0.911848	binding;nucleic acid binding;RNA binding;structural constituent of ribosome;structural molecule activity;tRNA binding	biosynthetic process;catabolic process;cellular component disassembly;cellular component organization;cellular metabolic process;cellular nitrogen compound metabolic process;cellular process;establishment of localization;macromolecule metabolic process;metabolic process;mRNA metabolic process;nitrogen compound metabolic process;nucleobase-containing compound metabolic process;primary metabolic pr…	cell part;cytosol;extracellular organelle;intracellular membrane-bounded organelle;intracellular non-membrane-bounded organelle;intracellular organelle;macromolecular complex;membrane;mitochondrion;organelle;ribonucleoprotein complex;ribosome;vesicle	Ribosome		8	8	8	46.8	46.8	46.8	10.645	0	15.65	837390000	32	0	2	1	4	4	6	4	4	2	3	2	C9K025;P18077;F8WBS5;F8WB72	C9K025;P18077;F8WBS5;F8WB72	60S ribosomal protein L35a	RPL35A	3	94;110;55;57
0.096221	0.438357	-0.096221	-0.688064	-0.789744	-2.99298	-0.87744	-0.740248	-0.766664	-0.47726	adenyl nucleotide binding;adenyl ribonucleotide binding;adenylate kinase activity;ATP binding;binding;catalytic activity;GTP binding;guanyl nucleotide binding;guanyl ribonucleotide binding;kinase activity;nucleobase-containing compound kinase activity;nucleoside diphosphate kinase activity;nucleoside triphosphate adenylate kinase activity;nucleotide binding;nucleotide kinase activity;phosphotrans…	anatomical structure development;biosynthetic process;cellular metabolic process;cellular nitrogen compound metabolic process;cellular process;developmental process;heterocycle metabolic process;metabolic process;nitrogen compound metabolic process;nucleobase-containing compound metabolic process;nucleobase-containing small molecule metabolic process;nucleotide metabolic process;phosphorus metabo…	cell part;extracellular organelle;intracellular membrane-bounded organelle;intracellular organelle;mitochondrion;organelle;vesicle	Purine metabolism		2	2	2	13.5	13.5	13.5	19.78	0	5.5104	125390000	7	2	1	0	0	0	0	1	1	1	0	1	D3DQ64;P27144	D3DQ64;P27144	Adenylate kinase 4, mitochondrial	AK4		171;223
-0.430534	-0.53311	0.0320816	0.106853	0.507021	1.96279	0	0.160236	-0.00675774	-0.108578	binding;nucleic acid binding;RNA binding;translation factor activity, nucleic acid binding;translation initiation factor activity	biological regulation;cell death;cellular process;death;regulation of cell cycle;regulation of translation;response to chemical stimulus;response to stimulus;signal transduction	cell part;cytoplasm;cytosol;macromolecular complex;membrane;protein complex	RNA transport;Viral myocarditis	eIF5C;MA3;MIF4G	15	15	15	20.5	20.5	20.5	102.33	0	49.884	690300000	85	6	11	11	10	6	8	5	4	8	7	9	D3DQV9;P78344;H0Y3P2;H0YCH5;H0YD77;H0YEC5;E9PKF8;H0YE22;H0YE44;H0YCF8	D3DQV9;P78344;H0Y3P2;H0YCH5	Eukaryotic translation initiation factor 4 gamma 2	EIF4G2		907;907;869;444;282;244;185;234;88;129
0.188655	0.107049	-0.0324564	-0.0298567	0.0298567	-2.77947	-0.0510435	-0.201425	-0.153159	0.153378	binding;enzyme binding;enzyme inhibitor activity;enzyme regulator activity;phosphatase binding;phosphatase inhibitor activity;phosphatase regulator activity;protein binding;protein phosphatase 1 binding;protein phosphatase binding;protein phosphatase inhibitor activity;protein phosphatase regulator activity	anatomical structure development;biological regulation;cell differentiation;cell motility;cellular component assembly;cellular component movement;cellular component organization;cellular metabolic process;cellular nitrogen compound metabolic process;cellular process;cytoskeleton organization;developmental process;locomotion;macromolecule metabolic process;metabolic process;nitrogen compound metab…	cell part;cell projection;cytoplasm;cytoskeleton;filopodium;intracellular non-membrane-bounded organelle;intracellular organelle;macromolecular complex;membrane;neuron projection;nucleoplasm;organelle;plasma membrane;protein complex;protein serine/threonine phosphatase complex;synapse		PDZ	6	6	6	16.9	16.9	16.9	89.333	0	50.364	218620000	19	2	1	6	1	0	1	1	0	2	4	1	D3DTX6;Q96SB3	D3DTX6;Q96SB3	Neurabin-2	PPP1R9B		817;815
0.031847	-0.403856	0	-0.392496	-0.226662	1.41004	0.149662	-0.036602	0.252453	0.115854	acid-amino acid ligase activity;adenyl nucleotide binding;adenyl ribonucleotide binding;ATP binding;binding;catalytic activity;identical protein binding;kinase activity;ligase activity;ligase activity, forming carbon-nitrogen bonds;molecular transducer activity;NF-kappaB-inducing kinase activity;nucleotide binding;phosphotransferase activity, alcohol group as acceptor;protein binding;protein dime…	aging;biological regulation;cellular component assembly;cellular component organization;cellular metabolic process;cellular process;developmental process;immune system process;macromolecular complex assembly;macromolecule metabolic process;macromolecule modification;metabolic process;phosphorus metabolic process;primary metabolic process;protein complex assembly;protein metabolic process;protein …	cell part;cytoplasm;cytosol;intracellular membrane-bounded organelle;intracellular organelle;lipid particle;macromolecular complex;membrane;nucleus;organelle;plasma membrane;protein complex;receptor complex	Apoptosis;Chagas disease (American trypanosomiasis);ko05152;Leishmaniasis;Measles;Neurotrophin signaling pathway;Toll-like receptor signaling pathway;Toxoplasmosis		11	11	11	27.7	27.7	27.7	76.059	0	86.457	315890000	58	6	8	6	6	3	6	2	4	6	5	6	D3YTB5;P51617;H7C2I6;H7C224;H7C3C1;H7C1F0;F8WAB6;H7C3G8	D3YTB5;P51617;H7C2I6;H7C224	Interleukin-1 receptor-associated kinase 1	IRAK1		708;712;276;392;218;234;339;212
-0.063118	0.288008	0.512325	0.847996	1.00983	-0.727676	-0.767296	-0.150707	0	-0.484222	binding;mRNA binding;nucleic acid binding;nucleotide binding;RNA binding	anatomical structure morphogenesis;biological regulation;cell morphogenesis;cellular component morphogenesis;cellular component organization;cellular process;developmental process	cell part;cytoplasm;intracellular membrane-bounded organelle;intracellular organelle;macromolecular complex;nucleoplasm;nucleus;organelle;ribonucleoprotein complex		RRM	17	17	17	38.6	38.6	38.6	30.302	0	157.64	7837200000	94	8	14	15	17	4	4	3	2	3	12	12	D6R9P3;D6RD18;D6RBZ0;Q99729	D6R9P3;D6RD18;D6RBZ0;Q99729	Heterogeneous nuclear ribonucleoprotein A/B	HNRNPAB		280;283;327;332
0.0940809	0.500503	-0.220666	0.0629301	-0.513961	-2.2908	-0.0629644	-0.667596	0.240167	-0.0629301	catalytic activity;deaminase activity;glucosamine-6-phosphate deaminase activity;hydrolase activity;intramolecular oxidoreductase activity;intramolecular oxidoreductase activity, interconverting aldoses and ketoses;isomerase activity	alcohol metabolic process;carbohydrate metabolic process;catabolic process;cellular metabolic process;cellular process;generation of precursor metabolites and energy;metabolic process;primary metabolic process;small molecule metabolic process	cell part;cytoplasm;extracellular organelle;intracellular membrane-bounded organelle;intracellular organelle;nucleus;organelle;vesicle	Amino sugar and nucleotide sugar metabolism		5	5	5	35	35	35	26.987	0	28.262	237730000	20	2	2	4	2	0	1	0	2	1	3	3	D6RAY7;D6R9P4;P46926;D6RFF8;D6RB13;D6R917;Q8TDQ7	D6RAY7;D6R9P4;P46926;D6RFF8;D6RB13	Glucosamine-6-phosphate isomerase;Glucosamine-6-phosphate isomerase 1	GNPDA1		237;274;289;290;160;138;276
-0.19083	-0.397001	0.070097	-0.353176	0.0282879	-2.68989	-0.209869	0.159763	-0.0282879	0.375389	binding;cation binding;enzyme binding;glycoprotein binding;ion binding;metal ion binding;protease binding;protein binding;protein dimerization activity;protein heterodimerization activity	anatomical structure development;behavior;biological adhesion;biological regulation;cell adhesion;cell differentiation;cell motility;cellular component movement;cellular component organization;cellular process;coagulation;developmental process;extracellular matrix organization;extracellular structure organization;immune system process;locomotion;multicellular organismal process;neurological syste…	cell part;cell surface;extracellular organelle;macromolecular complex;membrane;organelle;plasma membrane;protein complex;receptor complex;site of polarized growth;synapse;vesicle	Arrhythmogenic right ventricular cardiomyopathy (ARVC);Dilated cardiomyopathy;ECM-receptor interaction;Focal adhesion;Hematopoietic cell lineage;Hypertrophic cardiomyopathy (HCM);Pathways in cancer;Regulation of actin cytoskeleton;Small cell lung cancer	Int_alpha	2	2	2	18.3	18.3	18.3	15.229	0	5.1675	116190000	12	2	1	1	2	0	1	1	0	1	2	1	D6R9X8;P26006	D6R9X8;P26006	Integrin alpha-3;Integrin alpha-3 heavy chain;Integrin alpha-3 light chain	ITGA3	1	142;1051
-0.797314	-0.478032	0.124784	0.0900049	-0.0900049	-2.99763	-0.657563	-0.606422	-0.619391	-0.617262	structural constituent of ribosome;structural molecule activity	biosynthetic process;cellular component disassembly;cellular component organization;cellular metabolic process;cellular process;macromolecule metabolic process;metabolic process;mitochondrial translation;mitochondrion organization;organelle organization;primary metabolic process;protein metabolic process;translation;translational elongation;translational initiation	cell part;intracellular non-membrane-bounded organelle;intracellular organelle;macromolecular complex;membrane;organelle;ribonucleoprotein complex;ribosome			3	3	3	30.1	30.1	30.1	10.474	0	6.148	106300000	6	1	1	1	1	0	0	0	0	1	1	0	D6RAN8;H7C5U8;Q9P0M9	D6RAN8;H7C5U8;Q9P0M9	39S ribosomal protein L27, mitochondrial	MRPL27		93;136;148
0.321829	0.344934	-0.456865	-0.220093	-0.32135	-2.03948	-0.104256	0.14781	0.102358	-0.102358	enzyme activator activity;enzyme regulator activity;GTPase activator activity;GTPase regulator activity;nucleoside-triphosphatase regulator activity	biological regulation;cellular component organization;cellular membrane organization;cellular process;endocytosis;establishment of localization;immune system process;membrane invagination;membrane organization;multi-organism process;response to biotic stimulus;response to stimulus;response to stress;transport;vesicle-mediated transport	cell part;cytoskeleton;intracellular non-membrane-bounded organelle;intracellular organelle;membrane;organelle			5	5	5	34.7	34.7	34.7	20.147	0	13.587	445490000	14	3	0	1	0	0	1	1	1	1	3	3	D6RBS5;Q8IZ81;D6RHX2;V9GY58	D6RBS5;Q8IZ81;D6RHX2	ELMO domain-containing protein 2	ELMOD2		167;293;96;59
0.305439	0.503838	-0.00388527	-0.490112	-0.562822	-2.5714	0.017664	0.110889	0.00388527	-0.349298	binding;carbohydrate binding;cation binding;glycoprotein binding;heat shock protein binding;ion binding;mannose binding;metal ion binding;monosaccharide binding;protein binding;sugar binding	biological regulation;cellular process;establishment of localization;Golgi vesicle transport;protein transport;regulation of transport;transport;vesicle-mediated transport	cell part;cell surface;extracellular organelle;extracellular space;Golgi apparatus;intracellular membrane-bounded organelle;intracellular organelle;membrane;organelle;vesicle	Protein processing in endoplasmic reticulum		8	8	8	40.8	40.8	40.8	21.86	0	55.12	701130000	49	7	5	5	5	0	7	4	2	3	4	7	D6RIU4;D6RBV2;Q12907;D6RDX1;D6RBH1	D6RIU4;D6RBV2;Q12907;D6RDX1	Vesicular integral-membrane protein VIP36	LMAN2	1	191;325;356;288;203
-0.82886	-0.484966	-0.596595	-0.388219	-0.222157	-1.87651	0.685893	0.584517	0.469018	0.030612	catalytic activity;estradiol 17-beta-dehydrogenase activity;oxidoreductase activity;oxidoreductase activity, acting on CH-OH group of donors;oxidoreductase activity, acting on the CH-OH group of donors, NAD or NADP as acceptor;steroid dehydrogenase activity;steroid dehydrogenase activity, acting on the CH-OH group of donors, NAD or NADP as acceptor	biological regulation;biosynthetic process;catabolic process;cellular metabolic process;cellular process;hormone metabolic process;lipid metabolic process;metabolic process;primary metabolic process	cell part;cytoplasm;extracellular region;lipid particle			4	4	4	21.9	21.9	21.9	28.102	0	12.3	78666000	12	0	0	2	1	0	1	2	3	0	1	2	D6RCD0;Q8NBQ5	D6RCD0;Q8NBQ5	Estradiol 17-beta-dehydrogenase 11	HSD17B11		256;300
0.470637	0.156535	0.396455	-0.977113	-0.61793	-2.88571	-0.461075	-0.710578	-0.854195	-0.537687		biological regulation	cell part;cell projection;filopodium;site of polarized growth		RUN	3	3	3	27.7	27.7	27.7	17.317	0	6.6565	59148000	5	2	1	2	0	0	0	0	0	0	0	0	D6REM9;D6RCQ1;Q7L099	D6REM9;D6RCQ1;Q7L099	Protein RUFY3	RUFY3		155;201;469
0.0892563	0.0673599	-0.409382	-0.799751	-1.14476	-2.45163	-0.0638065	-0.535763	0.0638065	-0.544428	adenyl nucleotide binding;adenyl ribonucleotide binding;ATP binding;binding;carbon-nitrogen ligase activity, with glutamine as amido-N-donor;catalytic activity;glutaminyl-tRNA synthase (glutamine-hydrolyzing) activity;ligase activity;ligase activity, forming carbon-nitrogen bonds;nucleic acid binding;nucleotide binding;purine nucleotide binding;purine ribonucleoside triphosphate binding;purine ri…	amine metabolic process;biosynthetic process;cellular amino acid metabolic process;cellular component organization;cellular ketone metabolic process;cellular metabolic process;cellular nitrogen compound metabolic process;cellular process;macromolecule metabolic process;metabolic process;mitochondrial translation;mitochondrion organization;nitrogen compound metabolic process;nucleobase-containing …	cell part;intracellular membrane-bounded organelle;intracellular organelle;macromolecular complex;mitochondrion;organelle;protein complex		GatB_Yqey	5	5	5	16.5	16.5	16.5	57.653	0	65.258	53702000	20	3	3	1	1	0	2	1	1	1	1	6	D6REA0;O75879;D6RDU9;H0Y8G7;H0Y9F2;B4E0P2	D6REA0;O75879;D6RDU9	Glutamyl-tRNA(Gln) amidotransferase subunit B, mitochondrial	PET112;GATB		516;557;357;136;141;146
0.50137	0.686185	-0.0600271	-0.601613	-0.854365	-2.56753	0.68607	0.453189	-0.0333204	0.0333204	binding;protein binding;unfolded protein binding	cellular metabolic process;cellular process;establishment of localization;macromolecule metabolic process;metabolic process;primary metabolic process;protein folding;protein metabolic process;protein transport;transport	cell part;endoplasmic reticulum;extracellular space;intracellular membrane-bounded organelle;intracellular organelle;organelle	Protein processing in endoplasmic reticulum		6	6	6	15.2	15.2	15.2	52.748	0	17.981	127410000	14	2	1	1	0	0	3	1	1	2	1	2	D6REA1;Q9H173;A0RZB6;D6RIU8	D6REA1;Q9H173	Nucleotide exchange factor SIL1	SIL1	3	468;461;83;163
-0.134052	0.690222	0.414093	0.0747757	-0.104082	-2.18443	-0.150808	0.0842533	-0.0747757	-0.12225	binding;nucleic acid binding;RNA binding;translation activator activity;translation regulator activity;translation regulator activity, nucleic acid binding	biological regulation;catabolic process;cellular metabolic process;cellular nitrogen compound metabolic process;cellular process;macromolecule metabolic process;metabolic process;mRNA metabolic process;mRNA processing;nitrogen compound metabolic process;nucleobase-containing compound metabolic process;primary metabolic process;regulation of translation;RNA catabolic process;RNA metabolic process;…	cell part;cytoplasm;cytosol	RNA transport	MIF4G	4	4	4	15.1	15.1	15.1	39.908	0	12.825	157710000	15	3	2	2	1	0	1	0	2	1	1	2	D6REB4;Q9H074;D6RJF2;D6RJ02;D6R9H8	D6REB4;Q9H074;D6RJF2	Polyadenylate-binding protein-interacting protein 1	PAIP1		351;479;200;168;266
-0.150513	0.127439	0.262335	-0.114914	0.0884438	1.00579	0	-0.190001	-0.00974464	-0.0782013	binding;GTP binding;guanyl nucleotide binding;guanyl ribonucleotide binding;nucleotide binding;purine nucleotide binding;purine ribonucleoside triphosphate binding;purine ribonucleotide binding;ribonucleotide binding	cell cycle;cell division;cellular component assembly;cellular component organization;cellular process;macromolecular complex assembly;protein complex assembly	cell part;cell projection;cytoplasm;extracellular organelle;neuron projection;organelle;synapse;vesicle			6	6	5	23.8	23.8	19.3	49.005	0	19.859	326620000	33	3	5	4	5	2	1	1	1	1	6	4	D6RGI3;D6RER5;Q9NVA2;D6RDU5;D6RDP1;D6R9Y6;H0Y9G8;H0Y961	D6RGI3;D6RER5;Q9NVA2;D6RDU5;D6RDP1;D6R9Y6	Septin-11	2020-09-11		425;432;429;372;126;136;82;160
0.0781898	0.00838661	0.157948	-0.153589	-0.0903378	0.94418	-0.279709	-0.148062	-0.144876	0.272072	binding;calcium-dependent protein binding;protein binding	biological regulation;carbohydrate metabolic process;cellular component organization;cellular metabolic process;cellular process;establishment of localization;Golgi vesicle transport;immune system process;macromolecule metabolic process;macromolecule modification;membrane organization;metabolic process;organelle organization;peptidyl-amino acid modification;primary metabolic process;protein glyco…	cell part;cytoplasm;cytoplasmic membrane-bounded vesicle;cytosol;endoplasmic reticulum;intracellular membrane-bounded organelle;intracellular organelle;macromolecular complex;membrane;organelle;protein complex;vesicle	Protein processing in endoplasmic reticulum	WD40	8	8	8	10.8	10.8	10.8	136.22	0	26.971	256860000	31	3	5	2	2	3	1	3	2	3	2	5	D6REX3;O94979;D6RHZ5;H7BXG7;H0YAB3;H0Y9T9;H0YAF5;H0Y8V7;H0Y8W8	D6REX3;O94979;D6RHZ5;H7BXG7	Protein transport protein Sec31A	SEC31A		1251;1220;877;969;443;235;181;285;383
0.432433	0.158624	0.0236406	-0.51554	0.0661364	-1.48228	-0.30111	-0.823722	-0.591559	-0.0236406	binding;protein binding;SNAP receptor activity	cellular component organization;cellular membrane organization;cellular process;establishment of localization;Golgi vesicle transport;membrane fusion;membrane organization;protein transport;transport;vesicle-mediated transport	cell part;endoplasmic reticulum;intracellular membrane-bounded organelle;intracellular organelle;macromolecular complex;membrane;organelle;protein complex	Phagosome;SNARE interactions in vesicular transport		7	7	7	26	26	26	35.42	0	16.607	149730000	10	2	2	0	2	0	0	0	0	0	2	2	D6RF48;Q9P2W9;D6RC71	D6RF48;Q9P2W9;D6RC71	Syntaxin-18	STX18		308;335;169
0.345059	0.223174	0.18666	0.12264	-0.453719	-1.50827	-0.714314	-0.755008	-1.4278	-0.53978	binding;cation binding;enzyme activator activity;enzyme regulator activity;heme binding;ion binding;iron ion binding;metal ion binding;tetrapyrrole binding;transition metal ion binding	metabolic process	cell part;membrane			4	4	4	45	45	45	14.846	0	10.973	411320000	10	1	1	1	1	0	1	0	1	0	1	3	D6RFH4;H3BUX2;J3KNF8;O43169;J3QR91	D6RFH4;H3BUX2;J3KNF8;O43169;J3QR91	Cytochrome b5 type B	CYB5B		131;140;150;146;64
-0.573751	-0.616791	-0.138466	0.170828	0.515636	0.396713	0.0746746	0.123341	0	-0.217491	3'-5' exonuclease activity;3'-5'-exoribonuclease activity;AU-rich element binding;binding;catalytic activity;exonuclease activity;exonuclease activity, active with either ribo- or deoxyribonucleic acids and producing 5'-phosphomonoesters;exoribonuclease activity;exoribonuclease activity, producing 5'-phosphomonoesters;hydrolase activity;hydrolase activity, acting on ester bonds;nuclease activity;…	biological regulation;catabolic process;cellular metabolic process;cellular nitrogen compound metabolic process;cellular process;immune system process;macromolecule metabolic process;metabolic process;mRNA metabolic process;nitrogen compound metabolic process;nucleobase-containing compound metabolic process;primary metabolic process;response to stimulus;RNA catabolic process;RNA metabolic process…	cell part;chromosome;cytoplasm;cytoskeleton;cytosol;exosome (RNase complex);extracellular organelle;intracellular membrane-bounded organelle;intracellular non-membrane-bounded organelle;intracellular organelle;macromolecular complex;nuclear chromosome;nucleolus;nucleoplasm;nucleus;organelle;protein complex;vesicle	RNA degradation		4	4	4	11.8	11.8	11.8	46.977	0	18.715	165900000	31	3	3	3	3	2	3	2	2	4	4	2	D6RIY6;Q06265;D6R905;D6RAP4;D6RA17;H0Y9L5	D6RIY6;Q06265;D6R905;D6RAP4;D6RA17	Exosome complex component RRP45	EXOSC9		423;439;226;86;242;172
0.147796	0.391669	-0.189942	-0.148629	0.0153265	-1.56498	-0.707326	-0.592608	-0.714676	-0.0153265		biosynthetic process;cell cycle;cell proliferation;cellular metabolic process;cellular nitrogen compound metabolic process;cellular process;DNA geometric change;DNA metabolic process;DNA recombination;DNA repair;DNA replication;macromolecule metabolic process;metabolic process;mitotic cell cycle;nitrogen compound metabolic process;nucleobase-containing compound metabolic process;primary metabolic…	cell part;cytoplasm;intracellular membrane-bounded organelle;intracellular organelle;macromolecular complex;nucleoplasm;nucleus;organelle;protein complex			2	2	2	17.2	17.2	17.2	22.653	0	5.1035	59221000	10	0	2	2	2	0	0	0	1	0	1	2	E5RFF9;Q9BRT9	E5RFF9;Q9BRT9	DNA replication complex GINS protein SLD5;DNA replication complex GINS protein SLD5;DNA replication complex GINS protein SLD5, N-terminally processed	GINS4		192;223
-0.443508	-0.599483	-0.882864	-0.450527	0	0.85276	0.425419	0.581224	0.525694	0.70628		catabolic process;cellular metabolic process;cellular process;macromolecule metabolic process;metabolic process;primary metabolic process;protein metabolic process;proteolysis;proteolysis involved in cellular protein catabolic process	cell part;cytoplasm;endoplasmic reticulum;extracellular organelle;intracellular membrane-bounded organelle;intracellular organelle;macromolecular complex;membrane;organelle;plasma membrane;protein complex;vesicle		PHB	7	7	7	23.7	23.7	23.7	37.725	0	42.247	536650000	28	0	1	4	3	2	4	4	4	3	1	2	E5RHW4;O94905;E5RJ09;B0QZ43;O75477	E5RHW4;O94905;E5RJ09;B0QZ43;O75477	Erlin-2;Erlin-1	ERLIN2;ERLIN1	3	338;339;197;275;346
-0.558329	-0.724375	-0.699244	-0.0892601	0	0.729563	0.11471	0.387859	0.0880184	0.0562305	binding;nucleic acid binding;RNA binding;structural constituent of ribosome;structural molecule activity	biosynthetic process;catabolic process;cellular component disassembly;cellular component organization;cellular metabolic process;cellular nitrogen compound metabolic process;cellular process;establishment of localization;macromolecule metabolic process;metabolic process;mRNA metabolic process;nitrogen compound metabolic process;nucleobase-containing compound metabolic process;primary metabolic pr…	cell part;cytoplasm;cytosol;extracellular organelle;intracellular membrane-bounded organelle;intracellular non-membrane-bounded organelle;intracellular organelle;macromolecular complex;membrane;nucleus;organelle;ribonucleoprotein complex;ribosome;vesicle	Ribosome		8	8	8	62.3	62.3	62.3	12.656	0	128.15	2506300000	57	3	4	8	5	5	5	6	5	4	7	5	E5RI99;P62888;A0A0C4DH44;A0A0B4J213;E5RJH3	E5RI99;P62888;A0A0C4DH44	60S ribosomal protein L30	RPL30		114;115;96;51;56
0.0317039	-0.0317039	0.252188	0.334257	0.577015	-1.91357	-0.43474	0.19249	-0.74526	-0.624413		cellular metabolic process;cellular process;macromolecule metabolic process;macromolecule modification;metabolic process;primary metabolic process;protein metabolic process;protein modification by small protein conjugation or removal;protein modification process;viral reproduction	cell part;cytoplasm;extracellular organelle;macromolecular complex;nucleoplasm;organelle;protein complex;vesicle		JAB_MPN	7	7	7	27.9	27.9	27.9	36.064	0	22.97	626580000	33	5	4	7	4	0	1	3	1	1	2	5	E7EM64;Q7L5N1;H7C3T0	E7EM64;Q7L5N1	COP9 signalosome complex subunit 6	COPS6		326;327;123
-0.838628	-0.304445	-0.516803	-0.25145	-0.754974	-2.65964	-0.834203	0.280487	0.57259	-0.759195		anatomical structure development;biological adhesion;biological regulation;cell adhesion;cellular component assembly;cellular component organization;cellular membrane organization;cellular process;developmental process;establishment of localization;membrane organization;regulation of protein stability	cell part;cytoplasmic membrane-bounded vesicle;endosome;extracellular organelle;intracellular membrane-bounded organelle;intracellular organelle;macromolecular complex;membrane;organelle;plasma membrane;protein complex;vesicle	Insulin signaling pathway	PHB	3	3	3	8.9	8.9	8.9	47.142	0	19.776	56375000	9	0	0	1	1	0	0	1	1	1	3	1	J3QLD9;E7EMK3;Q14254;K7EKW9	J3QLD9;E7EMK3;Q14254	Flotillin-2	FLOT2		428;483;428;249
-0.051733	0.22492	0.20574	-0.0178909	0.101412	0.557432	0.00464249	0	-0.0215302	-0.139307	actin binding;actin filament binding;binding;cytoskeletal protein binding;identical protein binding;protein binding;protein dimerization activity;protein heterodimerization activity;protein homodimerization activity;spectrin binding;structural molecule activity;transcription factor binding	anatomical structure morphogenesis;biological regulation;cell communication;cell death;cell differentiation;cell morphogenesis;cellular component assembly;cellular component disassembly;cellular component morphogenesis;cellular component organization;cellular homeostasis;cellular metabolic process;cellular process;cytoskeleton organization;death;developmental process;embryo development;establishm…	cell part;cell projection;cytoskeleton;cytosol;F-actin capping protein complex;intracellular membrane-bounded organelle;intracellular non-membrane-bounded organelle;intracellular organelle;macromolecular complex;membrane;neuron projection;nucleoplasm;nucleus;organelle;plasma membrane;protein complex		Aldolase_II	13	13	13	29.7	29.7	29.7	70.055	0	78.177	987150000	77	10	9	9	9	1	7	3	4	9	7	9	E7EV99;E7ENY0;P35611;A0A0A0MSR2;H0Y9H2;D6RF25;D6RJE2;D6RAH3;H0YFD8	E7EV99;E7ENY0;P35611;A0A0A0MSR2;H0Y9H2	Alpha-adducin	ADD1		632;663;737;400;444;142;69;137;105
-0.220896	0	0.0188293	-0.0117359	0.12653	0.879623	-0.0887203	0.00389671	-0.0228977	-0.224356	binding;GTP binding;guanyl nucleotide binding;guanyl ribonucleotide binding;identical protein binding;nucleotide binding;protein binding;purine nucleotide binding;purine ribonucleoside triphosphate binding;purine ribonucleotide binding;ribonucleotide binding;structural molecule activity	anatomical structure morphogenesis;biological regulation;cell cycle;cell division;cellular component assembly;cellular component morphogenesis;cellular component organization;cellular process;cytokinesis;developmental process;macromolecular complex assembly;mitosis;nuclear division;organelle fission;organelle organization;protein complex assembly	cell part;cytoplasm;cytoskeleton;extracellular organelle;intracellular membrane-bounded organelle;intracellular non-membrane-bounded organelle;intracellular organelle;kinetochore;macromolecular complex;membrane;midbody;nucleolus;nucleus;organelle;plasma membrane;protein complex;septin complex;synapse;vesicle			7	7	7	24.2	24.2	24.2	48.715	0	41.447	519840000	55	5	7	6	9	2	4	4	4	4	7	3	E7ES33;E7EPK1;Q16181;G3V1Q4;A0A0U1RRE1;A0A0U1RRD1;A0A0U1RRH9;Q6ZU15	E7ES33;E7EPK1;Q16181;G3V1Q4	Septin-7	2020-09-07		417;437;437;401;157;77;147;432
0	0.230883	0.0380249	0.133156	-0.174301	0.25989	-0.251375	-0.370647	-0.231407	0.0761585	acetyltransferase activity;catalytic activity;H4 histone acetyltransferase activity;histone acetyltransferase activity;lysine N-acetyltransferase activity;N-acetyltransferase activity;N-acyltransferase activity;peptide alpha-N-acetyltransferase activity;peptide N-acetyltransferase activity;transferase activity;transferase activity, transferring acyl groups;transferase activity, transferring acyl …	cellular component organization;cellular metabolic process;cellular process;chromatin modification;chromatin organization;chromosome organization;histone modification;macromolecule metabolic process;macromolecule modification;metabolic process;organelle organization;peptidyl-amino acid modification;primary metabolic process;protein acylation;protein metabolic process;protein modification process	cell part;cytoplasm;extracellular organelle;organelle;vesicle			6	6	6	30.4	30.4	30.4	19.311	0	23.121	334640000	20	3	2	4	2	0	1	0	1	1	3	3	E7EQ69;Q9GZZ1;A0A087WWJ2;C9J5D1;B0AZT5;F8WCK0;C9JZU6;C9J5J3;A0A0D9SF32	E7EQ69;Q9GZZ1;A0A087WWJ2;C9J5D1;B0AZT5	N-alpha-acetyltransferase 50	NAA50		168;169;81;129;95;48;57;58;58
0	-0.121683	-0.0761871	-0.236507	-0.875427	-0.112906	0.682159	1.04993	0.848066	0.0567532	adenyl nucleotide binding;adenyl ribonucleotide binding;ATP binding;binding;catalytic activity;cation binding;coenzyme binding;cofactor binding;ion binding;isocitrate dehydrogenase (NAD+) activity;isocitrate dehydrogenase activity;magnesium ion binding;metal ion binding;NAD binding;nucleotide binding;oxidoreductase activity;oxidoreductase activity, acting on CH-OH group of donors;oxidoreductase a…	carbohydrate metabolic process;catabolic process;cellular ketone metabolic process;cellular metabolic process;cellular process;cofactor metabolic process;metabolic process;organic acid metabolic process;primary metabolic process;small molecule metabolic process	cell part;intracellular membrane-bounded organelle;intracellular non-membrane-bounded organelle;intracellular organelle;mitochondrion;nucleolus;nucleoplasm;organelle	Citrate cycle (TCA cycle)		6	6	6	26.1	26.1	26.1	35.43	0	23.388	376490000	27	1	3	4	1	1	5	2	1	1	2	6	G5E9Q7;E7EQB8;P51553;H7C1W2;E9PF84;H0Y5Q7	G5E9Q7;E7EQB8;P51553;H7C1W2;E9PF84;H0Y5Q7	Isocitrate dehydrogenase [NAD] subunit, mitochondrial;Isocitrate dehydrogenase [NAD] subunit gamma, mitochondrial	IDH3G		322;340;393;199;285;211
0.0256443	0.0969906	0.120806	0.10741	0	-0.571424	-0.234428	-0.432739	-0.0969944	-0.316437	actin binding;actin filament binding;binding;cell adhesion molecule binding;cytoskeletal protein binding;protein binding	anatomical structure development;biological adhesion;biological regulation;cell adhesion;cell development;cellular component assembly;cellular component organization;cellular membrane organization;cellular metabolic process;cellular process;cytoskeleton organization;developmental process;endocytosis;establishment of localization;establishment or maintenance of cell polarity;locomotion;macromolecu…	apical part of cell;brush border;cell body;cell part;cell projection;cytoplasm;cytoskeleton;cytosol;extracellular organelle;extracellular space;filopodium;intracellular non-membrane-bounded organelle;intracellular organelle;macromolecular complex;membrane;microvillus;nucleolus;organelle;plasma membrane;protein complex;vesicle	Gastric acid secretion;Leukocyte transendothelial migration;Pathogenic Escherichia coli infection;Regulation of actin cytoskeleton	B41	27	27	17	45.4	45.4	32.1	69.371	0	124.6	3701400000	141	20	19	16	13	5	11	7	6	10	18	16	E7EQR4;P15311;E9PNP4	E7EQR4;P15311	Ezrin	EZR		586;586;52
-0.540008	0.233397	-0.191762	-1.17819	-1.18968	-2.64089	0.781838	0.191762	1.10458	0.593694			cell part;cytoplasm;intracellular membrane-bounded organelle;intracellular organelle;mitochondrion;organelle			5	5	5	23.7	23.7	23.7	26.776	0	14.772	696150000	19	2	2	1	1	0	3	1	1	4	1	3	E7EQY1;Q96C01;C9JF51;C9J2Y4	E7EQY1;Q96C01	Protein FAM136A	FAM136A		245;138;163;105
-0.0105896	0.290926	0.0418911	0.0543747	-0.00348854	-2.59236	-0.180302	0.170752	-0.169752	-0.172712	binding;cation binding;chromatin binding;DNA binding;ion binding;metal ion binding;nucleic acid binding;nucleic acid binding transcription factor activity;sequence-specific DNA binding;sequence-specific DNA binding transcription factor activity;transition metal ion binding;zinc ion binding	biological regulation;cellular component organization;cellular process;chromatin organization;chromosome organization;organelle organization;regulation of cell cycle;regulation of mitotic cell cycle	cell part;chromatin remodeling complex;cohesin complex;cytoplasm;intracellular membrane-bounded organelle;intracellular organelle;macromolecular complex;nucleoplasm;nucleus;organelle;protein complex;transcriptional repressor complex		BAH;SANT;ZnF_GATA	7	5	5	18.3	12.8	12.8	58.726	0	8.4642	291980000	13	2	1	4	1	0	1	0	0	0	0	4	E7EQY4;E7EV10;Q9BTC8;D6W5A2;E9PCS8	E7EQY4;E7EV10;Q9BTC8;D6W5A2;E9PCS8	Metastasis-associated protein MTA3	MTA3		514;590;594;537;392
0	-0.368747	-0.669365	-0.220173	0.140692	1.1915	-0.496034	-0.628174	-0.300051	-0.623054						5	5	5	7.5	7.5	7.5	88.986	0	7.7861	42841000	9	1	2	0	3	2	0	0	0	0	0	1	E7ER68;Q658Y4;H0YBR6;G3V120;P0C866	E7ER68;Q658Y4	Protein FAM91A1	FAM91A1		789;838;114;218;280
-0.252754	0.117874	-0.00255203	-0.120661	0.0911331	0	-0.823562	0.0575523	-0.778001	-0.628699	binding;catalytic activity;cation binding;hydrolase activity;ion binding;metal ion binding;metallopeptidase activity;peptidase activity;peptidase activity, acting on L-amino acid peptides		cell part;membrane			6	6	6	12	12	12	93.159	0	15.306	120400000	9	1	1	2	1	1	0	1	0	0	0	2	E7ER77;Q7Z2K6;A0A0C4DGF0	E7ER77;Q7Z2K6;A0A0C4DGF0	Endoplasmic reticulum metallopeptidase 1	ERMP1	2	841;904;351
-0.302296	-0.562169	0.217905	0	0.27865	-3.20715	-0.74702	-0.537253	-0.814219	-0.687287	binding;cation binding;ion binding;metal ion binding		cell part;nucleoplasm		ZnF_C3H1	4	4	4	6.8	6.8	6.8	108.94	0	15.048	98984000	15	1	2	3	3	1	0	1	1	1	2	0	E7ERS3;Q86VM9;H3BRH3	E7ERS3;Q86VM9	Zinc finger CCCH domain-containing protein 18	ZC3H18		977;953;196
-0.156226	-0.0379114	-0.162993	0.24816	0.293843	-2.68659	-0.0479918	0.37428	0.153687	0.0379114	structural constituent of ribosome;structural molecule activity	biosynthetic process;cellular component disassembly;cellular component organization;cellular metabolic process;cellular process;macromolecule metabolic process;metabolic process;mitochondrial translation;mitochondrion organization;organelle organization;primary metabolic process;protein metabolic process;translation;translational elongation;translational initiation	cell part;intracellular membrane-bounded organelle;intracellular organelle;macromolecular complex;membrane;mitochondrion;organelle;ribonucleoprotein complex			3	3	3	17.5	17.5	17.5	24.325	0	8.7667	149970000	14	1	1	2	2	1	2	1	1	1	2	0	E7ESL0;J3KQY1;Q9NWU5	E7ESL0;J3KQY1;Q9NWU5	39S ribosomal protein L22, mitochondrial	MRPL22		212;232;206
-0.232927	0	0.0424175	-0.0852757	0.225037	0.199566	-0.278702	-0.171553	-0.0723553	0.248455	binding;cation binding;chromatin binding;core promoter binding;core promoter sequence-specific DNA binding;DNA binding;ion binding;metal ion binding;nucleic acid binding;nucleic acid binding transcription factor activity;protein binding;protein binding transcription factor activity;regulatory region DNA binding;regulatory region nucleic acid binding;repressing transcription factor binding;RNA pol…	behavior;biological regulation;biosynthetic process;catabolic process;cellular component organization;cellular metabolic process;cellular nitrogen compound metabolic process;cellular process;chromatin organization;chromosome organization;DNA metabolic process;DNA repair;macromolecule metabolic process;metabolic process;nitrogen compound metabolic process;nucleobase-containing compound metabolic p…	cell part;chromatin remodeling complex;cytoplasm;intracellular membrane-bounded organelle;intracellular organelle;macromolecular complex;nuclear envelope;nucleoplasm;nucleus;organelle;protein complex;transcriptional repressor complex		BAH;SANT;ZnF_GATA	13	13	11	24.2	24.2	20.2	79.372	0	46.371	434010000	69	8	9	10	11	2	3	3	4	5	8	6	E7ESY4;Q13330;H0Y4T7;F8W9Y9;H7C3F3;H0YIT0;E9PF88	E7ESY4;Q13330;H0Y4T7	Metastasis-associated protein MTA1	MTA1		703;715;511;255;55;57;91
0.178651	0.136979	-0.226394	-0.155215	-0.271754	-2.52568	-0.31317	-0.0401487	0.0401487	0.0749178	binding;calcium ion binding;calcium-dependent protein serine/threonine phosphatase activity;calmodulin binding;calmodulin-dependent protein phosphatase activity;catalytic activity;cation binding;drug binding;enzyme binding;hydrolase activity;hydrolase activity, acting on ester bonds;ion binding;metal ion binding;phosphatase activity;phosphatase binding;phosphoprotein phosphatase activity;phosphor…	anatomical structure development;behavior;behavioral interaction between organisms;biological regulation;cell activation;cell death;cell development;cell differentiation;cell growth;cell proliferation;cellular homeostasis;cellular ion homeostasis;cellular metabolic process;cellular process;death;developmental process;establishment of localization;exocytosis;growth;homeostatic process;immune syste…	cell part;cytoplasm;cytosol;extracellular organelle;intracellular membrane-bounded organelle;intracellular organelle;macromolecular complex;membrane;mitochondrion;nucleoplasm;organelle;plasma membrane;protein complex;protein serine/threonine phosphatase complex;vesicle	Alzheimer's disease;Amyotrophic lateral sclerosis (ALS);Apoptosis;Axon guidance;B cell receptor signaling pathway;Calcium signaling pathway;ko05152;Long-term potentiation;MAPK signaling pathway;Natural killer cell mediated cytotoxicity;Oocyte meiosis;Osteoclast differentiation;T cell receptor signaling pathway;VEGF signaling pathway;Wnt signaling pathway	PP2Ac	4	4	4	17	17	17	47.815	0	14.374	97105000	18	2	2	3	2	0	1	0	1	1	3	3	E7ETC2;Q08209;Q5F2F8;P16298;E9PPC8;E9PK68;H0YB02;G3V111;P48454	E7ETC2;Q08209;Q5F2F8;P16298;E9PPC8;E9PK68	Serine/threonine-protein phosphatase;Serine/threonine-protein phosphatase 2B catalytic subunit alpha isoform;Serine/threonine-protein phosphatase 2B catalytic subunit beta isoform	PPP3CA;PPP3CB		423;521;496;524;132;147;153;326;512
0.0366631	0.0310268	-0.119221	0.1731	0.49472	-2.46658	-0.610323	-0.17535	-0.705316	-0.0310268	binding;DNA binding;double-stranded DNA binding;mRNA 3'-UTR binding;mRNA binding;nucleic acid binding;nucleotide binding;RNA binding;single-stranded DNA binding;structure-specific DNA binding	biological regulation;biosynthetic process;cellular metabolic process;cellular nitrogen compound metabolic process;cellular process;DNA metabolic process;DNA replication;macromolecule metabolic process;metabolic process;nitrogen compound metabolic process;nucleobase-containing compound metabolic process;primary metabolic process;regulation of translation;RNA metabolic process;RNA processing	cell part;cytoplasm;intracellular membrane-bounded organelle;intracellular organelle;nucleus;organelle		RRM	2	2	2	8.1	8.1	8.1	40.147	0	6.2029	87170000	14	1	2	1	2	1	1	1	0	2	2	1	E7ETU5;F6Y5H0;P29558;E7EPF2;C9J9B2;C9JIJ9;A0A1B0GUW5;Q6XE24	E7ETU5;F6Y5H0;P29558;E7EPF2;C9J9B2;C9JIJ9;A0A1B0GUW5;Q6XE24	RNA-binding motif, single-stranded-interacting protein 1;RNA-binding motif, single-stranded-interacting protein 3	RBMS1;RBMS3		370;386;406;127;264;436;503;437
0.0474672	0.123137	0.481069	0.720939	0.723533	-2.23636	-0.240634	-0.0474672	-0.393132	-0.112851	binding;nucleic acid binding;RNA binding;structural constituent of ribosome;structural molecule activity	biosynthetic process;cellular component disassembly;cellular component organization;cellular metabolic process;cellular process;macromolecule metabolic process;metabolic process;mitochondrial translation;mitochondrion organization;organelle organization;primary metabolic process;protein metabolic process;translation;translational elongation;translational initiation	cell part;intracellular non-membrane-bounded organelle;intracellular organelle;macromolecular complex;membrane;organelle;ribonucleoprotein complex;ribosome			5	5	5	21.8	21.8	21.8	40.47	0	11.164	288120000	14	2	3	3	3	0	1	0	0	0	1	1	H0Y9G6;E7ETU7;P09001;D6RC14;E9PF06;D6RBQ5	H0Y9G6;E7ETU7;P09001;D6RC14	39S ribosomal protein L3, mitochondrial	MRPL3		363;375;348;155;176;28
0.333313	0.265497	0.0445786	-0.0816555	-0.572964	-1.30451	-0.158386	0.170053	-0.110252	0	binding;carboxylic acid binding;catalytic activity;cation binding;ion binding;iron ion binding;L-ascorbic acid binding;metal ion binding;oxidoreductase activity;oxidoreductase activity, acting on paired donors, with incorporation or reduction of molecular oxygen;oxidoreductase activity, acting on paired donors, with incorporation or reduction of molecular oxygen, 2-oxoglutarate as one donor, and …	cellular component organization;cellular metabolic process;cellular process;extracellular matrix organization;extracellular structure organization;macromolecule metabolic process;macromolecule modification;metabolic process;primary metabolic process;protein metabolic process;protein modification process;response to chemical stimulus;response to stimulus;response to stress	cell part;endoplasmic reticulum;extracellular organelle;intracellular membrane-bounded organelle;intracellular organelle;membrane;organelle;vesicle	Lysine degradation	P4Hc	14	14	14	26.7	26.7	26.7	81.169	0	45.911	847780000	67	11	6	7	6	2	6	2	2	6	8	11	E7ETU9;O00469;C9JXZ0	E7ETU9;O00469	Procollagen-lysine,2-oxoglutarate 5-dioxygenase 2	PLOD2	3	703;737;229
-0.0265694	0.100739	0.0824318	0.0477543	0.201616	-0.677509	0.0664673	-0.11764	-0.0749416	-0.263811		anatomical structure development;cell differentiation;cellular process;developmental process	cell part;membrane		eIF5C	10	9	9	28.9	27.2	27.2	46.913	0	36.925	383660000	43	6	5	9	6	0	3	1	2	2	5	4	E7ETZ4;Q9Y6E2;Q75MG1;B5MCE7;B5MCH7;E9PFD4;E9PFE3;C9JF98;F8WDX8;E7EMS9	E7ETZ4;Q9Y6E2;Q75MG1;B5MCE7;B5MCH7;E9PFD4	Basic leucine zipper and W2 domain-containing protein 2	BZW2		408;419;274;225;343;189;161;162;170;208
0.0656071	-0.280882	0.547548	0.460321	0.480904	2.70589	-0.0686264	-1.05966	-0.716948	-0.312475	structural molecule activity	cell division;cellular component movement;cellular component organization;cellular process;cytoskeleton organization;establishment of localization;organelle organization	cell part;cytoplasm;cytoskeleton;extracellular organelle;intracellular non-membrane-bounded organelle;intracellular organelle;macromolecular complex;membrane;organelle;plasma membrane;protein complex;vesicle			11	11	11	8.1	8.1	8.1	245.44	0	39.511	170580000	32	2	4	4	3	8	2	1	1	1	4	2	E7EVA0;P27816;H7C4C5;H0Y2V1;B5MEG9;F8W9U4;A0A0J9YVV8;A0A0J9YW37;H7C456	E7EVA0;P27816	Microtubule-associated protein;Microtubule-associated protein 4	MAP4		2297;1152;493;463;760;828;76;140;283
0	-0.103466	0.390484	-0.141888	-0.374407	-2.5041	0.771088	0.385033	0.0121231	-0.105185	binding;catalytic activity;coenzyme binding;cofactor binding;flavin adenine dinucleotide binding;monooxygenase activity;oxidoreductase activity;oxidoreductase activity, acting on paired donors, with incorporation or reduction of molecular oxygen;squalene monooxygenase activity	alcohol metabolic process;biosynthetic process;cellular aromatic compound metabolic process;cellular metabolic process;cellular process;lipid metabolic process;metabolic process;primary metabolic process;response to chemical stimulus;response to stimulus;small molecule metabolic process	cell part;membrane	Steroid biosynthesis		3	3	3	13.2	13.2	13.2	53.067	0	16.646	58472000	18	2	2	1	2	0	3	2	1	1	1	3	E7EVQ6;Q14534;H0YBN7	E7EVQ6;Q14534;H0YBN7	Squalene monooxygenase	SQLE		479;574;163
0.0328598	-0.105272	-0.00649261	-0.773901	-1.53116	-1.86065	0.154629	0.175409	0.267115	0.00649261	catalytic activity;oxidoreductase activity;oxidoreductase activity, acting on a sulfur group of donors;oxidoreductase activity, acting on a sulfur group of donors, oxygen as acceptor;prenylcysteine oxidase activity	amine metabolic process;catabolic process;cellular amino acid metabolic process;cellular ketone metabolic process;cellular metabolic process;cellular nitrogen compound metabolic process;cellular process;macromolecule metabolic process;metabolic process;nitrogen compound metabolic process;organic acid metabolic process;primary metabolic process;protein metabolic process;proteolysis;proteolysis inv…	cell part;extracellular region;membrane			5	5	5	22.5	22.5	22.5	45.679	0	14.834	268260000	21	3	2	3	1	0	2	3	1	1	2	3	E7EVZ5;Q8NBM8	E7EVZ5;Q8NBM8	Prenylcysteine oxidase-like	PCYOX1L		404;494
0.321854	0.260731	-3.38411	-0.0873528	-3.71267	-2.82432	-3.43261	0.775408	1.18556	0.387932	binding;cation binding;DNA binding;ion binding;metal ion binding;nucleic acid binding	anatomical structure development;biological regulation;biosynthetic process;cellular metabolic process;cellular nitrogen compound metabolic process;cellular process;developmental process;macromolecule metabolic process;metabolic process;nitrogen compound metabolic process;nucleobase-containing compound metabolic process;primary metabolic process;RNA metabolic process	cell part;chromatin remodeling complex;macromolecular complex;protein complex;transcriptional repressor complex		ZnF_C2H2	1	1	1	2.5	2.5	2.5	94.902	0.0042976	2.4351	4767400000	17	2	1	2	0	0	1	3	2	2	2	2	H0YFS7;E7EW59;Q9Y467	H0YFS7;E7EW59;Q9Y467	Sal-like protein 2	SALL2		902;906;1007
-0.286608	0.00116158	0.0321789	-0.316399	0.0591259	0.445227	-0.335922	0.229183	-0.148382	0	binding;nucleic acid binding;nucleotide binding;RNA binding	biosynthetic process;cellular metabolic process;cellular nitrogen compound metabolic process;cellular process;macromolecule metabolic process;metabolic process;mRNA metabolic process;mRNA processing;nitrogen compound metabolic process;nucleobase-containing compound metabolic process;primary metabolic process;RNA metabolic process;RNA processing;RNA splicing;transcription from RNA polymerase II pr…	cell part;intracellular membrane-bounded organelle;intracellular organelle;macromolecular complex;mRNA cleavage factor complex;nucleoplasm;nucleus;organelle;protein complex	mRNA surveillance pathway	RRM	8	8	6	28.8	28.8	23.1	46.665	0	58.617	884200000	57	6	6	5	5	5	6	4	3	6	5	6	E9PID8;E7EWR4;P33240;A0A0A0MT56	E9PID8;E7EWR4;P33240	Cleavage stimulation factor subunit 2	CSTF2		438;597;577;225
-0.420311	-0.0601101	0	-0.0149632	0.360558	1.85059	-0.332857	0.301065	0.163965	0.0806942	binding;nucleic acid binding;nucleotide binding;RNA binding;translation factor activity, nucleic acid binding;translation initiation factor activity	biological regulation;biosynthetic process;catabolic process;cellular metabolic process;cellular nitrogen compound metabolic process;cellular process;macromolecule metabolic process;metabolic process;mRNA metabolic process;mRNA processing;nitrogen compound metabolic process;nucleobase-containing compound metabolic process;primary metabolic process;protein metabolic process;regulation of translati…	cell part;cytosol;macromolecular complex;protein complex	mTOR signaling pathway;RNA transport	RRM	13	13	13	30.5	30.5	30.5	69.697	0	77.218	2139400000	59	5	6	6	8	9	5	0	5	4	6	5	E7EX17;P23588;F8VX11;F8W0K0;F8VSC7;F8VP89;F8VYE9;F8VRU1;REV__F8VX11;REV__P23588;REV__E7EX17	E7EX17;P23588;F8VX11	Eukaryotic translation initiation factor 4B	EIF4B		616;611;360;169;227;275;185;175;360;611;616
-0.643614	-0.511809	-0.735019	-0.215145	0	-2.11551	0.253988	0.141047	0.0145721	-0.706264	actin binding;binding;calmodulin binding;cytoskeletal protein binding;protein binding;tropomyosin binding	cellular component movement;cellular process;multicellular organismal process;muscle contraction	cell part;cytoskeleton;cytosol;intracellular non-membrane-bounded organelle;intracellular organelle;membrane;organelle;plasma membrane	Vascular smooth muscle contraction		5	5	5	14.2	14.2	14.2	61.705	0	16.316	115860000	12	1	1	2	2	1	2	1	0	0	1	1	E9PGZ1;E7EX44;Q05682;C9J813	E9PGZ1;E7EX44;Q05682;C9J813	Caldesmon	CALD1		536;557;793;459
-0.410835	-0.493244	-0.63311	-0.528095	0.331207	-2.79922	0	-0.776865	-0.719683	0.226849	binding;catalytic activity;DNA binding;DNA-directed RNA polymerase activity;nucleic acid binding;nucleotidyltransferase activity;RNA polymerase activity;transferase activity;transferase activity, transferring phosphorus-containing groups	biosynthetic process;cellular metabolic process;cellular nitrogen compound metabolic process;cellular process;macromolecule metabolic process;metabolic process;nitrogen compound metabolic process;nucleobase-containing compound metabolic process;primary metabolic process;RNA metabolic process	cell part;intracellular membrane-bounded organelle;intracellular non-membrane-bounded organelle;intracellular organelle;nucleolus;nucleus;organelle	Purine metabolism;Pyrimidine metabolism;RNA polymerase		3	3	1	27.7	27.7	6.4	15.862	0	10.448	96517000	9	0	1	0	1	0	1	1	0	1	2	2	E7EX70	E7EX70		POLR1E		141
0	-0.190039	0.874107	0.815235	0.868828	1.19774	-0.0206585	-0.104109	-1.09931	-0.0587444	catalytic activity;hydrolase activity;hydrolase activity, acting on acid anhydrides;hydrolase activity, acting on acid anhydrides, in phosphorus-containing anhydrides;motor activity;nucleoside-triphosphatase activity;pyrophosphatase activity	anatomical structure development;biological regulation;cell cycle;cellular component movement;cellular component organization;cellular metabolic process;cellular process;cytoskeleton-dependent intracellular transport;developmental process;endosome transport;establishment of localization;immune system process;macromolecule metabolic process;metabolic process;mitosis;mitotic cell cycle;nuclear divi…	cell leading edge;cell part;centrosome;cytoplasm;cytosol;intracellular non-membrane-bounded organelle;intracellular organelle;kinetochore;macromolecular complex;membrane;microtubule organizing center;organelle;protein complex	Huntington's disease;Vasopressin-regulated water reabsorption	CAP_GLY	18	18	18	24.5	24.5	24.5	139.09	0	150.52	775250000	74	3	16	16	14	5	3	0	0	1	8	8	E7EX90;Q14203;Q6AWB1;E7EWF7;C9JJD0;C9JKG6;E9PCY0;C9J1B7;C9JZA4;C9JTE5;C9JJN7	E7EX90;Q14203;Q6AWB1	Dynactin subunit 1	DCTN1;DKFZp686E0752		1256;1278;890;191;121;135;186;64;76;76;87
-0.208336	0.328287	-0.238621	0.0897312	0	-0.881208	-0.1255	0.0622578	0.0529118	-0.338572	binding;DNA binding;nucleic acid binding;protein binding;protein binding transcription factor activity;TBP-class protein binding;transcription coactivator activity;transcription cofactor activity;transcription factor binding;transcription factor binding transcription factor activity	anatomical structure development;anatomical structure morphogenesis;biological regulation;biosynthetic process;cellular metabolic process;cellular nitrogen compound metabolic process;cellular process;developmental process;establishment of localization;growth;macromolecule metabolic process;metabolic process;nitrogen compound metabolic process;nucleobase-containing compound metabolic process;prima…	cell part;cytoplasm;extracellular organelle;intracellular membrane-bounded organelle;intracellular organelle;macromolecular complex;nucleus;organelle;protein complex;vesicle			4	4	4	59.2	59.2	59.2	7.813	0	91.305	654290000	39	4	4	3	4	2	3	2	3	5	5	4	F8W1N5;F8VZJ2;F8VNW4;F8W0W4;H0YHX9;Q13765;E9PAV3;F8VZ58;Q9BZK3	F8W1N5;F8VZJ2;F8VNW4;F8W0W4;H0YHX9;Q13765;E9PAV3	Nascent polypeptide-associated complex subunit alpha;Nascent polypeptide-associated complex subunit alpha, muscle-specific form	NACA		71;136;148;198;213;215;2078;126;213
-0.195885	0.178535	0.196972	0.387825	0	0.0189247	-0.372105	-0.138153	-0.360336	-0.0107479	binding;nucleic acid binding;nucleotide binding	biological regulation;biosynthetic process;cell differentiation;cellular metabolic process;cellular nitrogen compound metabolic process;cellular process;developmental process;DNA metabolic process;establishment of localization;interspecies interaction between organisms;macromolecule metabolic process;metabolic process;mRNA metabolic process;mRNA processing;multi-organism process;nitrogen compound…	cell part;cytosol;extracellular organelle;intracellular membrane-bounded organelle;intracellular organelle;macromolecular complex;membrane;nucleoplasm;nucleus;organelle;protein complex;ribonucleoprotein complex;spliceosomal complex;transcription export complex;vesicle	mRNA surveillance pathway;RNA transport;Spliceosome	RRM	8	8	8	45.5	45.5	45.5	27.557	0	117.69	2966000000	79	9	9	7	9	3	6	7	5	7	6	11	E9PB61;Q86V81	E9PB61;Q86V81	THO complex subunit 4	ALYREF		264;257
0.315573	0.0895824	0	0.07584	0.0128345	0.361935	-0.228296	-0.142252	-0.473547	-0.426134	adenyl nucleotide binding;adenyl ribonucleotide binding;ATP binding;binding;carbohydrate binding;carbohydrate kinase activity;catalytic activity;fructokinase activity;glucokinase activity;glucose binding;hexokinase activity;kinase activity;mannokinase activity;monosaccharide binding;nucleotide binding;phosphotransferase activity, alcohol group as acceptor;purine nucleotide binding;purine ribonucl…	alcohol metabolic process;biological regulation;carbohydrate metabolic process;carbohydrate transport;catabolic process;cellular component organization;cellular homeostasis;cellular metabolic process;cellular process;establishment of localization;generation of precursor metabolites and energy;homeostatic process;metabolic process;mitochondrion organization;multicellular organismal process;organel…	cell part;cytosol;membrane	Amino sugar and nucleotide sugar metabolism;Butirosin and neomycin biosynthesis;Carbohydrate digestion and absorption;Fructose and mannose metabolism;Galactose metabolism;Glycolysis / Gluconeogenesis;Insulin signaling pathway;Starch and sucrose metabolism;Streptomycin biosynthesis;Type II diabetes mellitus		16	14	14	20.8	19.6	19.6	98.972	0	74.424	767860000	54	7	8	8	5	5	2	4	1	3	2	9	E9PB90;P52789	E9PB90;P52789	Hexokinase;Hexokinase-2	HK2		889;917
-0.223293	0	-0.623761	0.106207	-0.780212	-3.01795	-0.0324154	-0.778011	0.152243	-0.0900726	binding;lipid binding	anatomical structure development;biological regulation;cellular component organization;cellular membrane organization;cellular process;developmental process;embryo development;endocytosis;establishment of localization;membrane invagination;membrane organization;response to stimulus;signal transduction;transport;vesicle-mediated transport	cell part;Golgi apparatus;intracellular membrane-bounded organelle;intracellular organelle;macromolecular complex;nucleoplasm;organelle;protein complex	Endocytosis	ENTH;UIM	2	2	2	5.4	5.4	5.4	44.888	0	4.6868	41074000	5	1	0	2	0	0	0	0	0	0	1	1	F6PQP6;E9PBC1;I3L2B2;O95208;J3KSF8;J3KTF6;J3KSA6;J3KSC7;J3QLN2	F6PQP6;E9PBC1;I3L2B2;O95208;J3KSF8;J3KTF6;J3KSA6;J3KSC7;J3QLN2	Epsin-2	EPN2		409;484;577;641;32;38;62;75;95
-0.71705	-0.56792	-0.0647182	-0.118973	0.111223	0.826832	0	-0.548032	-0.713117	0.122747	binding;cation binding;ion binding;metal ion binding	establishment of localization;nuclear transport;nucleobase-containing compound transport;nucleocytoplasmic transport;transport			ZnF_C3H1	3	3	3	8.7	8.7	8.7	57.427	0	4.3026	268740000	5	0	0	2	1	1	0	0	0	0	1	0	E9PBY7;E9PQ61;O75152;A0A1W2PPR9	E9PBY7;E9PQ61;O75152	Zinc finger CCCH domain-containing protein 11A	ZC3H11A		515;652;810;301
0	0.140299	0.270592	-0.254204	-0.703273	-1.86895	-0.794701	0.405031	-0.18218	-0.570342	bHLH transcription factor binding;binding;catalytic activity;cation binding;coenzyme binding;cofactor binding;core promoter binding;core promoter sequence-specific DNA binding;deacetylase activity;DNA binding;enzyme binding;histone binding;histone deacetylase activity;histone deacetylase activity (H3-K9 specific);HLH domain binding;hydrolase activity;hydrolase activity, acting on carbon-nitrogen …	aging;anatomical structure development;anatomical structure formation involved in morphogenesis;biological regulation;biosynthetic process;catabolic process;cell communication;cell differentiation;cellular component organization;cellular homeostasis;cellular lipid metabolic process;cellular metabolic process;cellular nitrogen compound metabolic process;cellular process;chromatin modification;chro…	cell part;chromatin remodeling complex;cytoplasm;intracellular membrane-bounded organelle;intracellular non-membrane-bounded organelle;intracellular organelle;macromolecular complex;membrane;mitochondrion;nuclear envelope;nucleolus;nucleoplasm;nucleus;organelle;protein complex			4	4	4	12.8	12.8	12.8	50.496	0	11.691	93401000	10	0	1	4	2	0	0	0	1	0	0	2	E9PC49;Q96EB6;B0QZ35	E9PC49;Q96EB6;B0QZ35	NAD-dependent protein deacetylase sirtuin-1;SirtT1 75 kDa fragment	SIRT1		452;747;444
0.149422	0.471577	0.0390644	0	-0.220684	-0.842848	-0.0780735	0.264589	-0.145098	0.332148	binding;nucleic acid binding;RNA binding	biological regulation;biosynthetic process;cell proliferation;cellular component assembly;cellular component organization;cellular macromolecular complex assembly;cellular metabolic process;cellular nitrogen compound metabolic process;cellular process;chromatin modification;chromatin organization;chromosome organization;developmental process;DNA metabolic process;DNA replication;macromolecular co…	cell part;chromatin remodeling complex;histone methyltransferase complex;intracellular membrane-bounded organelle;intracellular organelle;macromolecular complex;nucleoplasm;nucleus;organelle;PcG protein complex;protein complex;transcriptional repressor complex		WD40	11	11	6	39.2	39.2	31	46.938	0	56.876	2276000000	60	7	6	7	4	2	7	5	4	5	5	8	E9PC52;Q16576;Q5JP02;Q5JP01;Q5JNZ6;C9JAJ9;C9J7L0	E9PC52;Q16576	Histone-binding protein RBBP7	RBBP7		416;425;175;285;85;37;67
-0.211792	-0.234753	0.129551	-0.426014	-0.632515	2.52295	0.68833	0.600742	0.01334	0	binding;catalytic activity;cation binding;coenzyme binding;cofactor binding;ion binding;metal ion binding;oxidoreductase activity;oxidoreductase activity, acting on the aldehyde or oxo group of donors;oxidoreductase activity, acting on the aldehyde or oxo group of donors, disulfide as acceptor;oxidoreductase activity, acting on the aldehyde or oxo group of donors, NAD or NADP as acceptor;oxogluta…	alcohol metabolic process;amine metabolic process;anatomical structure development;carbohydrate metabolic process;catabolic process;cell development;cell motility;cellular amino acid metabolic process;cellular component movement;cellular ketone metabolic process;cellular metabolic process;cellular nitrogen compound metabolic process;cellular process;cofactor metabolic process;developmental proces…	cell part;intracellular membrane-bounded organelle;intracellular organelle;macromolecular complex;membrane;mitochondrion;organelle;oxoglutarate dehydrogenase complex;protein complex	Citrate cycle (TCA cycle);Lysine degradation;Tryptophan metabolism	Transket_pyr	15	15	15	23.4	23.4	23.4	117.24	0	58.161	451270000	70	5	8	9	6	7	10	3	5	6	2	9	E9PDF2;E9PCR7;Q02218;A0A0D9SFS3;E9PFG7;C9J4G7;Q9ULD0	E9PDF2;E9PCR7;Q02218;A0A0D9SFS3;E9PFG7	2-oxoglutarate dehydrogenase, mitochondrial	OGDH		1034;1038;1023;1001;873;211;1010
-0.361351	0.0227566	-0.147993	-0.133612	0.127457	1.59313	0.285162	0.0703716	0	-0.117636	adenyl nucleotide binding;adenyl ribonucleotide binding;ATP binding;binding;nucleotide binding;protein binding;protein dimerization activity;protein heterodimerization activity;purine nucleotide binding;purine ribonucleoside triphosphate binding;purine ribonucleotide binding;ribonucleotide binding	cell cycle;cell division;cellular component organization;cellular metabolic process;cellular nitrogen compound metabolic process;cellular process;chromosome organization;chromosome segregation;DNA metabolic process;DNA packaging;macromolecule metabolic process;metabolic process;mitotic cell cycle;nitrogen compound metabolic process;nucleobase-containing compound metabolic process;organelle organi…	cell part;chromosome;condensin complex;cytoplasm;cytosol;intracellular membrane-bounded organelle;intracellular non-membrane-bounded organelle;intracellular organelle;macromolecular complex;nucleoplasm;nucleus;organelle;protein complex	Cell cycle - yeast	SMC_hinge	11	11	11	10.8	10.8	10.8	144.45	0	36.863	446470000	38	2	3	5	2	4	4	3	3	5	4	3	E9PD53;Q9NTJ3;C9JR83;C9JVD8;C9J578;C9J9E4	E9PD53;Q9NTJ3	Structural maintenance of chromosomes protein;Structural maintenance of chromosomes protein 4	SMC4		1263;1288;423;119;139;157
0	0.575989	-0.570753	-0.0308094	-0.797691	-2.97599	-0.733185	-0.683485	-0.749576	0.0282631	catalytic activity;hydrolase activity;hydrolase activity, acting on carbon-nitrogen (but not peptide) bonds	anatomical structure development;cellular component organization;cellular metabolic process;cellular nitrogen compound metabolic process;cellular process;cytoskeleton organization;developmental process;locomotion;metabolic process;nitrogen compound metabolic process;nucleobase-containing compound metabolic process;organelle organization;primary metabolic process;response to chemical stimulus;resp…	cell body;cell part;cell projection;cytoplasm;cytosol;intracellular non-membrane-bounded organelle;intracellular organelle;microtubule organizing center;neuron projection;neuronal cell body;organelle			5	2	2	10.4	4.9	4.9	62.029	0	4.4896	55008000	7	2	0	0	1	1	0	0	1	0	1	1	E9PD68;Q14194	E9PD68;Q14194	Dihydropyrimidinase-related protein 1	CRMP1		570;572
-0.165241	-0.042738	0.203279	0.0797482	0.138899	1.18822	-0.00823593	0.196642	-0.237526	0	actin binding;actin filament binding;adenyl nucleotide binding;adenyl ribonucleotide binding;ATP binding;binding;catalytic activity;cytoskeletal protein binding;hydrolase activity;hydrolase activity, acting on acid anhydrides;hydrolase activity, acting on acid anhydrides, in phosphorus-containing anhydrides;lipid binding;microfilament motor activity;motor activity;nucleoside-triphosphatase activi…	cellular component assembly;cellular component movement;cellular component organization;cellular localization;cellular process;cytoskeleton organization;establishment of localization;Golgi vesicle transport;localization;metabolic process;multicellular organismal process;neurological system process;organelle localization;organelle organization;transport;vesicle-mediated transport	brush border;cell part;cell projection;cytoplasm;cytoskeleton;endosome;extracellular organelle;filopodium;intracellular membrane-bounded organelle;intracellular non-membrane-bounded organelle;intracellular organelle;macromolecular complex;membrane;microvillus;organelle;plasma membrane;protein complex;vesicle		IQ;MYSc	17	17	17	20.8	20.8	20.8	128.48	0	60.716	677710000	70	8	10	9	8	8	5	2	0	5	5	10	E9PDF6;O43795;H7C2Y7;E7EQD9;A0A0U1RRI3;C9JUP5;C9JYW1;C9K0I9;G3V342;Q9UBC5	E9PDF6;O43795	Unconventional myosin-Ib	MYO1B		1107;1136;192;303;189;149;163;83;688;1043
0.229525	0.15399	-0.147354	-0.236885	-0.393829	-2.39333	0	0.0611038	-0.560469	-0.21171		cell differentiation;cellular component organization;cellular process;cytoskeleton organization;developmental process;organelle organization	cell part;cytoplasm;cytoskeleton;intracellular non-membrane-bounded organelle;intracellular organelle;organelle		CH	4	4	4	24.3	24.3	24.3	20.208	0	9.5221	86422000	12	3	1	0	1	0	2	1	0	0	1	3	E9PDU6;Q15417	E9PDU6;Q15417	Calponin;Calponin-3	CNN3		185;329
0.100967	-0.0970325	0.496033	0.520769	0.657915	-0.243471	0.0758705	-0.165131	-0.0182552	-0.113365	binding;nucleic acid binding;RNA binding;rRNA binding;structural constituent of ribosome;structural molecule activity	biological regulation;biosynthetic process;cellular component disassembly;cellular component organization;cellular metabolic process;cellular process;macromolecule metabolic process;metabolic process;mitochondrial translation;mitochondrion organization;organelle organization;primary metabolic process;protein metabolic process;translation;translational elongation;translational initiation	cell part;intracellular non-membrane-bounded organelle;intracellular organelle;macromolecular complex;membrane;organelle;ribonucleoprotein complex;ribosome;small ribosomal subunit		KRAB	4	4	4	51.9	51.9	51.9	14.374	0	26.752	480200000	21	0	2	3	3	0	3	1	1	1	4	3	E9PE17;I3L0E3;Q9Y2R5	E9PE17;I3L0E3;Q9Y2R5	28S ribosomal protein S17, mitochondrial	MRPS17;hCG_1984214		129;225;130
[truncated: 2,313 more rows]
